# Supplementary material for: Characterization of a new murine cell line of sarcomatoid hepatocellular carcinoma and its application for biomarker/therapy development
Source: PubMed Central journal article supplement (PMC5465177; doi:10.1038/s41598-017-03164-3), 2017-06-08
Supplement: 41598_2017_3164_MOESM1_ESM.pdf [file 41598_2017_3164_MOESM1_ESM.pdf]

# **Supplementary material**

## **Characterization of a new murine cell line of sarcomatoid hepatocellular carcinoma and its application for biomarker/therapy development**

Chia-Hung Yen, Chih-Chung Lai, Chen-Chung Liao, Sheng-Fan Wang, Yi-Jen Liao,  
Chien-Yi Tung, Jung-Hsien Hung, Shiu-Feng Huang, Yi-Ming Arthur Chen\*

### **Table of content**

#### **Supplementary Materials and Methods**

#### **Supplementary Fig 1 – Fig 6**

#### **Supplementary Table 1 – 5**

#### **Supplementary References**

## **Supplementary Materials and Methods**

### **Primary culture**

All mice were kept in a 12-hour light-dark-cycle room with water and standard mouse pellet chow. All animal experiments were performed in accordance with the Laboratory Animal Welfare Act, Guide for the Care and Use of Laboratory Animals evaluated and approved by the Institutional Animal Care and Use Committee of Kaohsiung Medical University. Liver tumor from a 22 month old *Gnmt*<sup>-/-</sup> mouse was separated and divided into several parts. One part was fixed in buffered formalin to perform hematoxylin and eosin (H&E) stain and immunohistochemical (IHC) staining (see below). Three parts were stored in liquid nitrogen for DNA, RNA, and protein analyses. The remnant tumor tissue was cut into pieces about 1 cm<sup>3</sup> in size. Each piece was minced in 0.5ml trypsin with scissors under sterile conditions. Minced tissue was filtered through a sterile iron mesh to remove large tissue clump. The resultant cell suspension was subjected to collagenase/trypsin treatment for 16–18h at 37°C in a petri dish. The digested supernatant was collected and washed with DMEM supplemented with penicillin (100 U/ml) and streptomycin (100 µg/ml) (Thermo Fisher Scientific); and then subjected to additional collagenase treatment for 90 min at 37°C. The digested supernatant was collected and washed as described above; then it was resuspended and subcultured in DMEM with 10% heat-inactivated fetal bovine

serum (HyClone), penicillin (100 U/ml), streptomycin (100 µg/ml), nonessential amino acids (0.1 mM), and L-glutamine (2 mM) (Life Technologies) in a humidified incubator with 5% CO<sub>2</sub>.

### **RNA isolation, reverse transcription and real-time PCR**

Total RNA was isolated from cells or tissues by using Trizol reagent (Life Technologies) according to the manufacturer's protocol. In brief, Complementary DNA was produced from cellular RNA (1 µg) using a SuperScript II RNase H-Reverse Transcriptase Kit (Life Technologies). Real-time PCR reactions were performed in 10-µl quantities of diluted cDNA sample, primers (100 nM), and a SYBR Green PCR Master Mix containing nucleotides, AmpliTaq Gold DNA polymerase, and optimized buffer components (Applied Biosystems). Reactions were assayed using an Applied Biosystems Step-One-plus real-time PCR system. The primer pairs used are shown in Table 1.

### **Western blotting**

Cells and tissues were lysed in lysis buffer (50 mM Tris [pH 7.5], 150 mM NaCl, 1% Tx-100) supplemented with protease- and phosphatase-inhibitors (1 mM PMSE, 10 µg/ml Leupeptin, 50 µg/ml TLCK, 50 µg/ml TPCK, 1 µg/ml Aprotinin, 1 mM NaF, 5

mM NaPPi, and 10 mM Na<sub>3</sub>VO<sub>4</sub>). The cell lysates were cleared via two 20 min spins at 13,200 rpm, 4°C. Protein concentrations were determined by Bio-Rad Protein Assay (Bio-Rad). Samples corresponded to 20 µg of protein which were used for Western blotting as described previously [1]. The antibodies used were: Mouse-Anti-GNMT monoclonal antibody [2]; Goat-Anti-vimentin polyclonal antibody (Santa Cruz); Rabbit-Anti-N-cadherin polyclonal antibody (Abcam); Rat-Anti-E-cadherin monoclonal antibody (Abcam); Mouse-Anti-GAPDH (Millipore).

### **Knock down experiment**

Lentivirus production, infection and stable cell selection were carried out according to the protocol published on the web site of RNAi Core (<http://rna.genmed.sinica.edu.tw/>). For lentivirus preparation, HEK293T cells were cotransfected with a packaging plasmid-pCMV-ΔR8.91, a VSV-G envelope expressing plasmid-pMD.G and the lentiviral constructs by using TurboFect™ Reagent (Fermentas). All transfections were performed according to the manufacturers' instructions. Supernatant containing lentiviruses was harvested according to the protocol published on the web site (<http://rna.genmed.sinica.edu.tw/>). Ymac-1 cells were infected with pseudotyped lentivirus in medium containing polybrene (8 µg/ml). Lentivirus-infected Ymac-1 cells were selected and grown in

complete DMEM supplemented with puromycin (1 µg/ml, Sigma-Aldrich).

### **Microarray analysis**

Total RNA was extracted as described previously. The RNA quality was assessed using Agilent 2100 Bioanalyzer (Agilent Technologies). Fluorescent antisense RNA (aRNA) targets were prepared from 1 µg total RNA samples using OneArray® Amino Allyl aRNA Amplification Kit (Phalanx Biotech Group) and Cy5 dyes (Amersham Pharmacia). Fluorescent targets were hybridized to the Mouse Whole Genome OneArray® with Phalanx hybridization buffer using Phalanx Hybridization System. The detailed descriptions of the gene array list are available from [http://www.phalanx.com.tw/attachment/download/MOA/MOA2\\_probeSequence.zip](http://www.phalanx.com.tw/attachment/download/MOA/MOA2_probeSequence.zip).

After 16 hrs hybridization at 50°C, non-specific binding targets were washed away by three different washing steps (Wash I, 42°C 5 mins; Wash II, 42°C 5 mins, 25°C 5 mins; Wash III, rinse 20 times), and the slides were dried by centrifugation and scanned by an Axon 4000B scanner (Molecular Devices). The Cy5 fluorescent intensities of each spot were analyzed by GenePix 4.1 software (Molecular Devices). The signal intensity of each spot was loaded into Rosetta Resolver System® (Rosetta Biosoftware) to process data analysis. The error model of Rosetta Resolver System® could remove both systematic and random errors from the data. We filtered out spots

that the flag is less than 0. Spots that passed the criteria were normalized by 50% media scaling normalization method. The technical repeat data was tested by Pearson correlation coefficient calculation to check the reproducibility (R value >0.975). Normalized spot intensities were transformed to gene expression log<sub>2</sub> ratios between the control and treatment groups. The microarray data are available at GSE88827. The spots with log<sub>2</sub> ratio ≥2 or log<sub>2</sub> ratio ≤-2 and *P* value <0.05 are tested for further analysis. Genes that progressively up-regulated or down-regulated from normal to HCC to SHC were defined as the difference of Ymac-1 to HCC and HCC to WT mice liver; both were higher than 4-folds. Differentially expressed genes were annotated and pathway enrichment analysis was performed by using DAVID Bioinformatics online tools (Database for Annotation, Visualization and Integrated Discovery; <http://david.abcc.ncifcrf.gov/>) [3].

Supplementary Fig 1

A

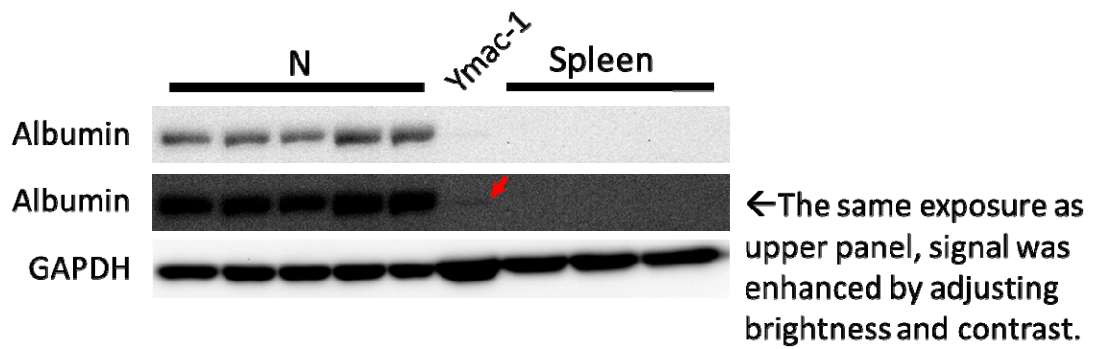

B

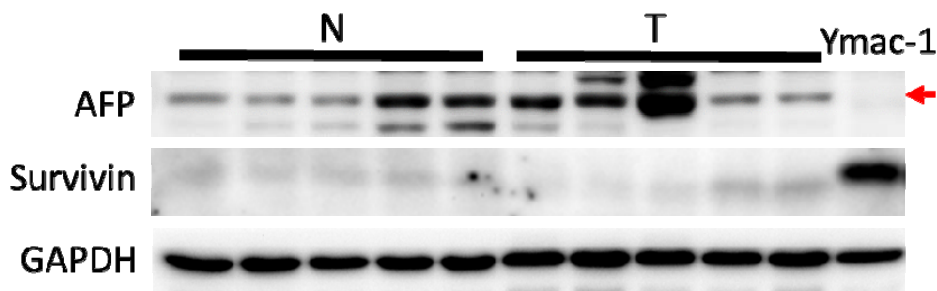

C

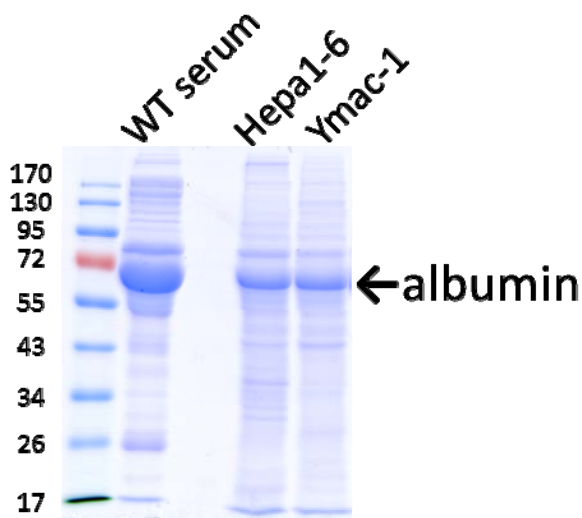

Supplementary Fig 1. SDS-PAGE analysis of secretory proteins from Ymac-1

cells cultured in serum free medium. (A) Western blot of analyses of Albumin in

normal liver (N, n=5), Ymac-1 cell, and normal spleen (n=3). The protein amount is

20 $\mu$ g/lane for normal liver lysate and 200 $\mu$ g/lane for Ymac-1 and normal spleen

lysates. No Albumin signal was observed in spleen, while a vague band can still be seen in Ymac-1. We tried to enhance signal by adjust brightness and contrast (middle panel), but the signal was still weak (red arrow). Nevertheless, the result was consist with the qPCR data showed in Fig 1C. (B) Western blot of analyses of AFP and Survivin in normal liver (N, n=5), HCC tissues from *Gnmt*<sup>-/-</sup> mice (T, n=5) and Ymac-1 cells (correlated with Fig 1E and F). (C) Twenty uL of wild-type mouse serum and the culture supernatant from Hepa1-6 cells, an ordinary mouse HCC cell line, were also loaded next to Ymac-1 for comparison.



**Supplementary Fig 2**

**A**

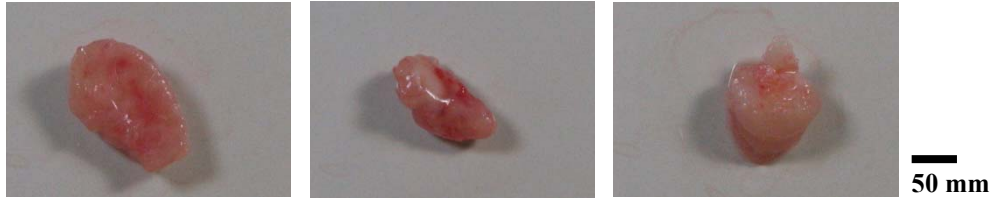

**B**

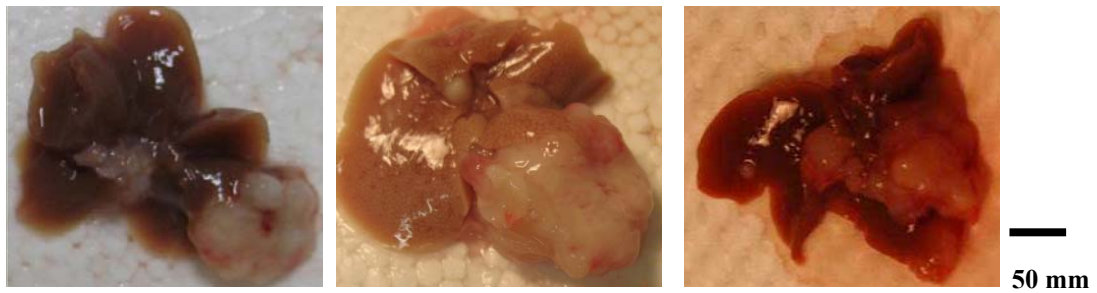

**Supplementary Fig 2. Gross tumor pictures of Ymac-1 allograft tumors**

**described in Fig 2. (A) Allograft tumors formed from subcutaneous inoculation. (B)**

**Allograft tumors formed from intrahepatic inoculation. Bar: 50mm.**

**Supplementary Fig 3**

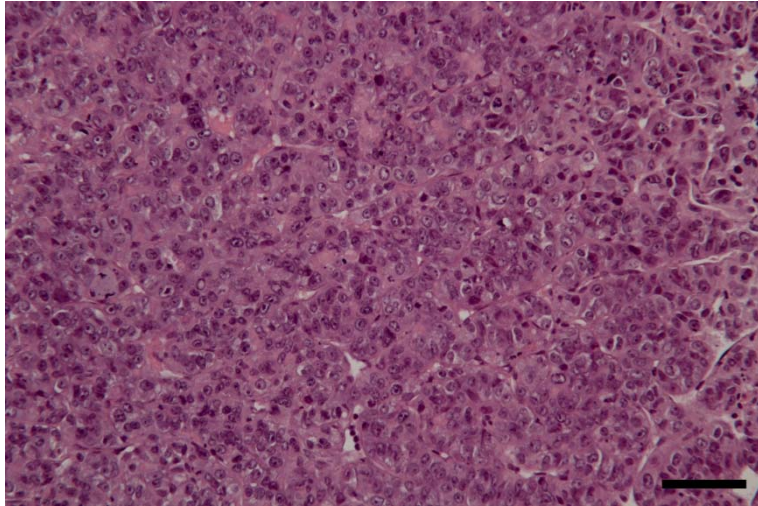

**Supplementary Fig 3. H&E staining of allograft tumor formed from Hepa1-6 cell.**

Hepa1-6 cells displayed typical HCC morphological features. Bar: 50 $\mu$ m.

Supplementary Fig 4

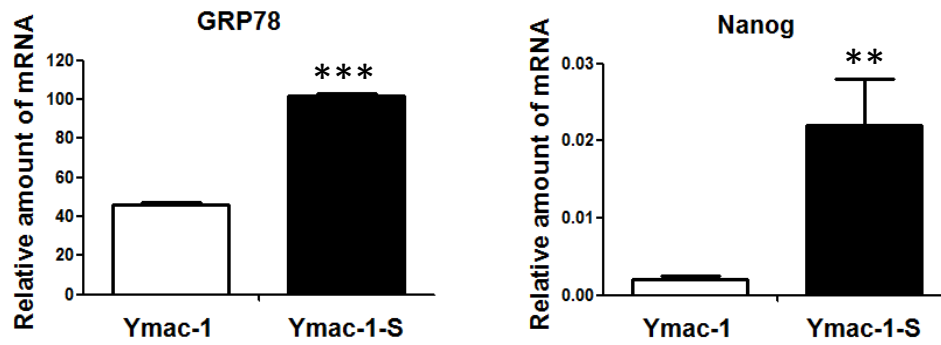

Supplementary Fig 4. The expression of Grp78 and Nanog in non-sphere (Ymac-1) and sphere (Ymac-1-S) cells.

## Supplementary Fig 5

A

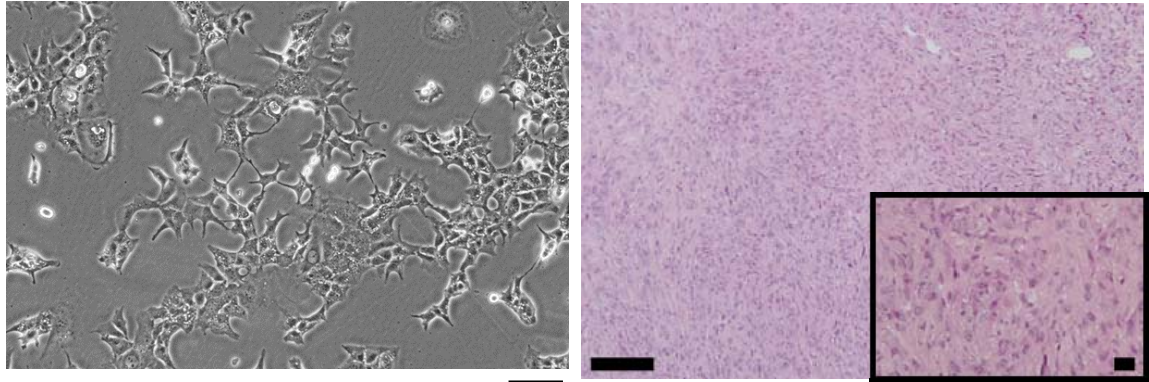

B

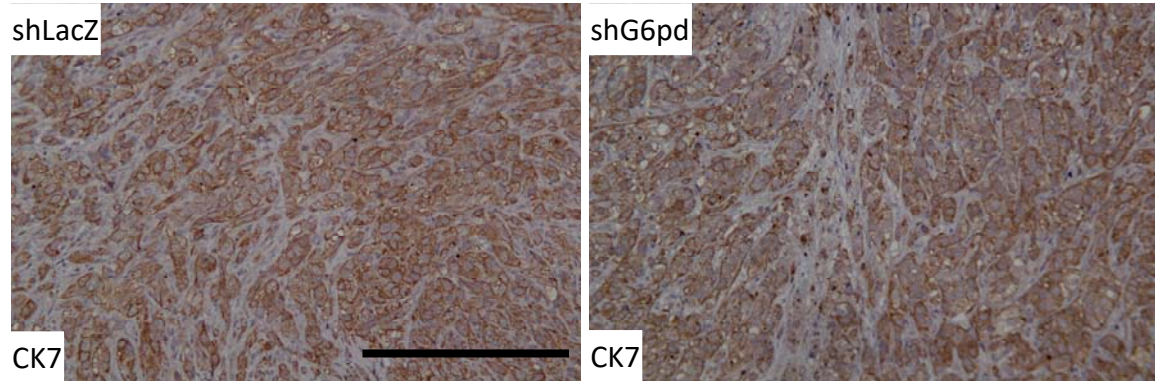

C

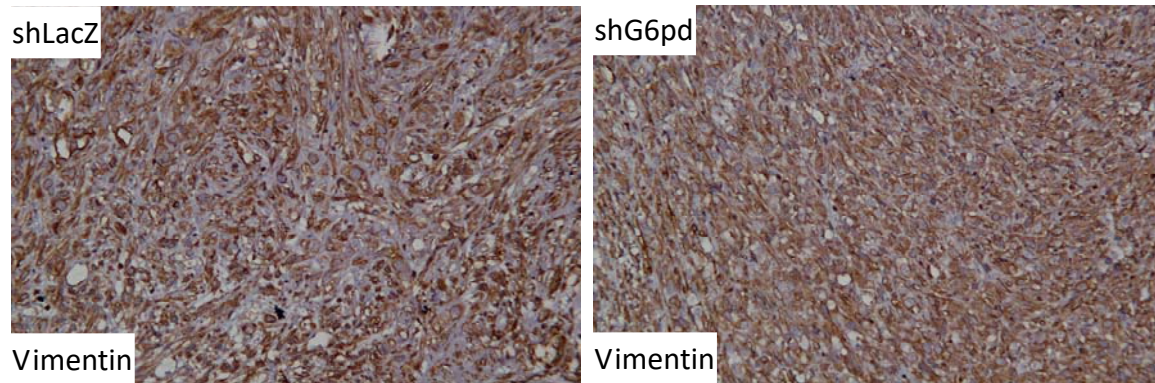

D

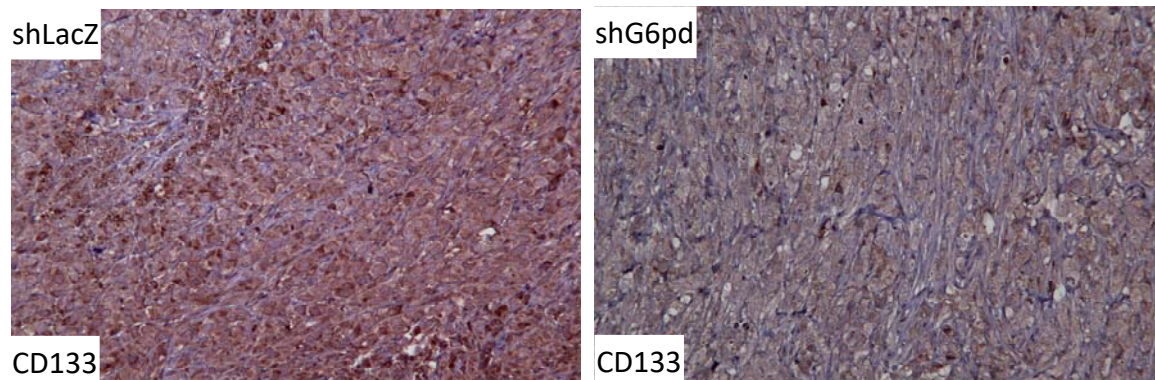

**Supplementary Fig 5. Cell morphology and H&E staining of allograft tumor formed from G6pd-knock down Ymac-1 cell.** (A) Left panel, an elongated, irregular fibroblastoid morphology was observed in G6pd knocked down Ymac-1 cell. Bar: 50 $\mu$ m. Right panel, a sarcomatoid appearance of allograft tumors formed from G6pd knock down Ymac-1 cells was observed. Bars: 100 $\mu$ m for lower magnification, 25 $\mu$ m for inset. (B-D) IHC staining of CK7 (B), and Vimentin (C) and CD133 (D) in Ymac-1 allograft tumor expressed of shG6pd (right panel) or control shRNA (shLacZ, left panel). Bars: 250 $\mu$ m.

## Supplementary Fig 6

A

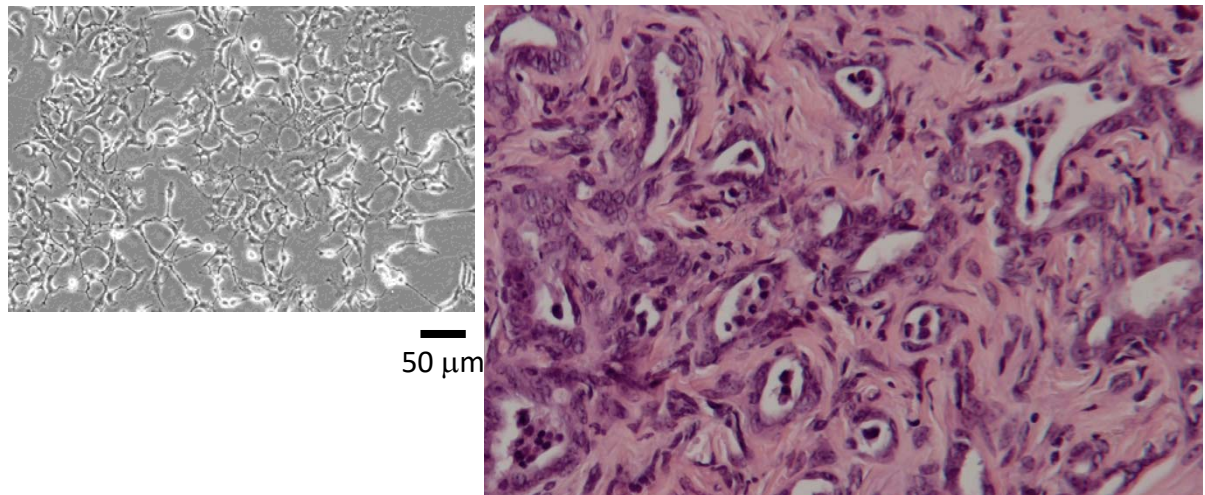

B

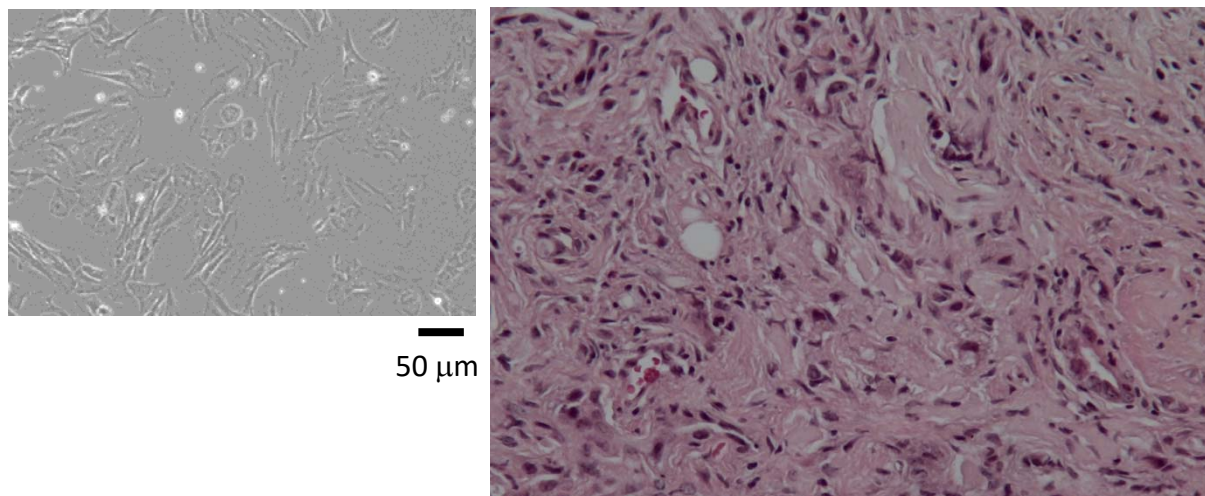

**Supplementary Fig 6. Cell morphology and H&E staining of allograft tumors of**

**Ymac-4 and Ymac-5 cells. (A) Cell morphology and pathology image of Ymac-4**

**cells. (B) Cell morphology and pathology image of Ymac-5 cells. Bars: 50μm for cell**

**image, 25μm for H&E.**

Supplementary Table1: List of genes up- or down-regulated in tumor, and Ymac-1 cells.

normal mice liver, Gnm1-/- mice liver

| Group         | Entrez Gene  | Gene symbol              | Description                | Normalize Value |             |            |
|---------------|--------------|--------------------------|----------------------------|-----------------|-------------|------------|
|               |              |                          |                            | Normal liver    | Gnm1-/- HCC | Ymac-1     |
| Pattern I -Up | 16852        | Lgals1                   | lectin, galactose binding  | 1077.78381      | 9607.65625  | 64393.375  |
|               | 20200        | S100a6                   | S100 calcium binding pr    | 539.55249       | 2387.40283  | 53889.7773 |
|               | 12306        | Anxa2                    | annexin A2                 | 1535.88647      | 13267.5     | 52868.0938 |
|               | 22352        | Vim                      | vimentin                   | 811.868286      | 5942.52637  | 37270.2812 |
|               | 181031433968 | Nme2lGm5566              | non-metastatic cells 2, p  | 6896.01758      | 14253.5225  | 30957.0566 |
|               | 27279        | Tnfrsf12a                | tumor necrosis factor rec  | 1926.28662      | 11701.293   | 29715.7305 |
|               | 18746        | Pkm2                     | pyruvate kinase, muscle    | 309.031097      | 2151.33154  | 29111.5449 |
|               | 20250        | Scd2                     | stearoyl-Coenzyme A de     | 335.545837      | 8834.62012  | 28634.9746 |
|               | 16691        | Krt8                     | keratin 8                  | 1859.44617      | 10538.3818  | 28087.5781 |
|               | 20296        | Ccl2                     | chemokine (C-C motif) l    | 50              | 235.515152  | 27796.8398 |
|               | 18858        | Pmp22                    | peripheral myelin protei   | 155.541321      | 577.748108  | 26863.7969 |
|               | 13014        | Cstb                     | cystatin B                 | 3541.21973      | 11011.9102  | 24834.2617 |
|               | 70350        | Basp1                    | brain abundant, membra     | 160.786591      | 1246.84314  | 24333.0762 |
|               | 21346        | Tagln2                   | transgelin 2               | 559.722534      | 5237.14258  | 20616.1777 |
|               | 12389        | Cav1                     | caveolin 1, caveolae prot  | 145.38504       | 566.33136   | 20466.0312 |
|               | 66395        | Ahnak                    | AHNAK nucleoprotein (      | 324.556244      | 1399.74292  | 18756.3184 |
|               | 27053        | Asns                     | asparagine synthetase      | 50              | 383.986938  | 18739.9297 |
|               | 13730        | Emp1                     | epithelial membrane prot   | 50              | 959.952515  | 18560.4023 |
|               | 59069        | Tpm3                     | tropomyosin 3, gamma       | 2706.69751      | 6296.23535  | 18463.0996 |
|               | 22381        | Wbp5                     | WW domain binding pro      | 965.945801      | 2672.04248  | 16818.7109 |
|               | 11745        | Anxa3                    | annexin A3                 | 51.7541656      | 313.930115  | 16253.9043 |
|               | 11674        | Aldoa                    | aldolase A, fructose-bisp  | 1807.84082      | 6093.19141  | 15920.3828 |
|               | 19240        | Tmsb10                   | thymosin, beta 10          | 501.775726      | 2800.68018  | 15902.1641 |
|               | 12484        | Cd24a                    | CD24a antigen              | 69.8758087      | 895.444214  | 15842.7949 |
|               | 20753        | Spr1a                    | small proline-rich protei  | 50              | 297.15155   | 15682.4629 |
|               | 665433       | Hist1h2ao                | histone cluster 1, H2ao    | 604.507812      | 2907.31152  | 15506.041  |
|               | 14115        | Fbln2                    | fibulin 2                  | 50              | 235.638229  | 13920.792  |
|               | 16765111186  | Stmn1lStmn1-rs1          | stathmin 1lsthathmin 1, re | 594.555908      | 2115.67651  | 13792.0547 |
|               | 59090        | Midn                     | midnolin                   | 2676.68335      | 6335.41895  | 13669.8711 |
|               | 74107        | Cep55                    | centrosomal protein 55     | 136.957092      | 1571.54492  | 13527.6875 |
|               | 11974        | Atp6v0e                  | ATPase, H+ transporting    | 1568.11377      | 3683.10449  | 13346.9824 |
|               | 98238        | Lrrc59                   | leucine rich repeat conta  | 1523.95898      | 3946.55469  | 13343.8711 |
|               | 18787        | Serpine1                 | serine (or cysteine) pepti | 50              | 4672.50732  | 13070.4697 |
|               | 26425        | Nubp1                    | nucleotide binding protei  | 3014.36938      | 6348.03711  | 13026.9678 |
|               | 192176       | Flna                     | filamin, alpha             | 600.837219      | 2350.52808  | 12805.2734 |
|               | 55989        | Nop58                    | NOP58 ribonucleoprotei     | 1500.05981      | 3836.02295  | 12540.7256 |
|               | 67511        | Tmed9                    | transmembrane emp24 p      | 1848.96045      | 5285.26562  | 12270.3467 |
|               | 67951        | Tubb6                    | tubulin, beta 6 class V    | 531.693359      | 1973.99817  | 12187.1494 |
|               | 107435       | Hat1                     | histone aminotransferase   | 735.891724      | 1537.66235  | 12117.2959 |
|               | 74122        | Tmem43                   | transmembrane protein 4    | 536.894226      | 2434.84668  | 11973.9238 |
|               | 12827        | Col4a2                   | collagen, type IV, alpha   | 2524.735535     | 3776.44775  | 11919.1934 |
|               | 23886        | Gdf15                    | growth differentiation fac | 973.188721      | 3298.41895  | 11716.8203 |
|               | 13681        | Eif4a1                   | eukaryotic translation ini | 2403.36621      | 5564.9834   | 11705.7266 |
|               | 227737       | Fam129b                  | family with sequence sin   | 171.386475      | 1793.62158  | 11632.1641 |
|               | 66286        | Sec11c                   | SEC11 homolog C (S. ce     | 849.182495      | 2839.50977  | 11601.6895 |
|               | 21807        | Tsc22d1                  | TSC22 domain family, n     | 1028.87329      | 2232.67651  | 11503.3672 |
|               | 69639        | Exosc8                   | exosome component 8        | 1467.06091      | 4938.36816  | 11375.9375 |
|               | 106957       | Slc39a6                  | solute carrier family 39   | 562.672302      | 1294.2334   | 11248.0527 |
| 12876         | Cpe          | carboxypeptidase E       | 152.079834                 | 5403.36914      | 11184.418   |            |
| 60527         | Fads3        | fatty acid desaturase 3  | 50                         | 447.311127      | 11084.4326  |            |
| 12615         | Cenpa        | centromere protein A     | 413.998474                 | 1408.41663      | 10645.7695  |            |
| 16573         | Kif5b        | kinesin family member 5  | 2261.63916                 | 5192.20947      | 10636.0723  |            |
| 353172        | Gars         | glycyl-tRNA synthetase   | 1990.03638                 | 4482.01562      | 10486.8301  |            |
| 52398         | Sept11       | septin 11                | 1302.13013                 | 4382.03467      | 10142.5869  |            |
| 83397         | Akap12       | A kinase (PRKA) anchor   | 115.453186                 | 1187.66833      | 10120.6426  |            |
| 15374         | Hn1          | hematological and neuro  | 486.694153                 | 2303.95142      | 10013.3086  |            |
| 12070         | Ngfrap1      | nerve growth factor rece | 50                         | 205.08316       | 9855.21191  |            |

|                 |                |                             |            |            |            |
|-----------------|----------------|-----------------------------|------------|------------|------------|
| 17254           | Slc3a2         | solute carrier family 3 (a  | 1200.31836 | 2899.13721 | 9648.21094 |
| 13427           | Dync1i2        | dynein cytoplasmic 1 int    | 1258.60571 | 2677.33228 | 9396.61328 |
| 16905           | Lmna           | lamin A                     | 1113.07495 | 2698.05933 | 9317.54492 |
| 201951100502897 | S100a11Gm12854 | S100 calcium binding pr     | 50         | 448.609863 | 9197.0625  |
| 14225           | Fkbp1a         | FK506 binding protein 1a    | 430.53723  | 3210.6936  | 9054.07812 |
| 224023          | Klhl22         | kelch-like 22 (Drosophila)  | 639.280945 | 1305.61621 | 8950.11133 |
| 22142           | Tuba1a         | tubulin, alpha 1A           | 63.2205925 | 381.243805 | 8825.24219 |
| 70769           | Nolc1          | nucleolar and coiled-body   | 573.360901 | 1220.60864 | 8783.75977 |
| 73690           | Glipr1         | GLI pathogenesis-related    | 153.982468 | 777.605286 | 8781.45703 |
| 21858           | Timp2          | tissue inhibitor of metallo | 736.78833  | 2730.67969 | 8770.52344 |
| 97064           | Wwtr1          | WW domain containing        | 919.044006 | 3573.53613 | 8683.56445 |
| 108143          | Taf9           | TAF9 RNA polymerase         | 1291.54443 | 3174.24756 | 8667.17969 |
| 67134           | Nop56          | NOP56 ribonucleoprotein     | 322.634613 | 871.321899 | 8645.73828 |
| 22156           | Tuft1          | tuftelin 1                  | 150.226334 | 1582.65186 | 8582.07324 |
| 12476           | Cd151          | CD151 antigen               | 850.487793 | 1727.76807 | 8563.48828 |
| 229731          | Slc25a24       | solute carrier family 25 (c | 131.781525 | 1819.74304 | 8352.09375 |
| 11821           | Aprt           | adenine phosphoribosyl t    | 840.23645  | 2023.28687 | 8236.21094 |
| 22038           | Plscr1         | phospholipid scramblase     | 455.122681 | 1852.51636 | 8214.43262 |
| 56433           | Vps29          | vacuolar protein sorting    | 1771.74023 | 3796.46582 | 8177.14014 |
| 68219           | Nudt21         | nudix (nucleoside diphos    | 1032.67383 | 2280.45581 | 8034.29199 |
| 107272          | Psat1          | phosphoserine aminotran     | 50         | 194.445892 | 7965.07812 |
| 54673           | Sh3glb1        | SH3-domain GRB2-like        | 708.141296 | 1562.10449 | 7927.15576 |
| 67834           | Idh3a          | isocitrate dehydrogenase    | 941.628296 | 2098.50464 | 7908.69873 |
| 16669           | Krt19          | keratin 19                  | 50         | 110.246124 | 7890.83154 |
| 14219           | Ctgf           | connective tissue growth    | 220.759598 | 728.07605  | 7814.63428 |
| 17698           | Msn            | moesin                      | 1158.44324 | 3148.92285 | 7758.78125 |
| 153821434858    | Hnrmpa11Gm5643 | heterogeneous nuclear ri    | 1054.39478 | 2116.25635 | 7651.09961 |
| 13685           | Eif4ebp1       | eukaryotic translation ini  | 1064.6825  | 3469.55859 | 7622.96484 |
| 16779           | Lamb2          | laminin, beta 2             | 302.649963 | 1458.33069 | 7592.29199 |
| 53331           | Stx7           | syntaxin 7                  | 913.241089 | 2385.06836 | 7469.47559 |
| 58523           | Elp2           | elongation protein 2 hom    | 1345.78906 | 3227.16943 | 7445.15039 |
| 11739           | Slc25a4        | solute carrier family 25 (c | 111.722397 | 1505.24268 | 7270.80078 |
| 67938           | Myl12b         | myosin, light chain 12B,    | 248.061646 | 1087.87415 | 7085.21973 |
| 16952           | Anxa1          | annexin A1                  | 58.518692  | 496.560303 | 7077.87109 |
| 66054           | Cndp2          | CNDP dipeptidase 2 (me      | 909.611694 | 1966.39844 | 6953.17139 |
| 11544           | Adprh          | ADP-ribosylarginine hyd     | 759.36792  | 2136.56494 | 6914.64453 |
| 68816           | Ppil1          | peptidylprolyl isomerase    | 424.918365 | 896.979187 | 6906.57129 |
| 20641           | Snrpd1         | small nuclear ribonucleo    | 299.163147 | 629.432007 | 6874.32715 |
| 11632           | Aip            | aryl-hydrocarbon recepto    | 948.601929 | 1898.11694 | 6823.59277 |
| 67041           | Oxct1          | 3-oxoacid CoA transfera     | 189.308502 | 922.973206 | 6722.25586 |
| 68480           | 1110007C09Rik  | RIKEN cDNA 1110007C         | 310.624817 | 639.299683 | 6721.26807 |
| 98878           | Ehd4           | EH-domain containing 4      | 291.283325 | 845.097229 | 6600.0752  |
| 14609           | Gja1           | gap junction protein, alp   | 602.874512 | 2018.24353 | 6397.23486 |
| 67896           | Ccdc80         | coiled-coil domain conta    | 522.877258 | 2090.4917  | 6373.88086 |
| 66409           | Rsl1d1         | ribosomal L1 domain co      | 742.421753 | 1699.27698 | 6291.18652 |
| 14062           | F2r            | coagulation factor II (thr  | 335.90387  | 2485.33105 | 6177.80371 |
| 16573           | Kif5b          | kinesin family member 5     | 929.612183 | 2267.24072 | 6167.84863 |
| 15277           | Hk2            | hexokinase 2                | 161.165222 | 2946.37476 | 6076.60938 |
| 12527           | Cd9            | CD9 antigen                 | 317.733093 | 2288.47314 | 6043.69971 |
| 21859           | Timp3          | tissue inhibitor of metallo | 768.702026 | 1844.05212 | 6018.47363 |
| 16007           | Cyr61          | cysteine rich protein 61    | 114.486832 | 458.519958 | 6013.0708  |
| 67116           | Cuedc2         | CUE domain containing       | 839.997314 | 1755.56567 | 5982.81006 |
| 11983           | Atpif1         | ATPase inhibitory factor    | 553.899048 | 2361.66211 | 5845.13037 |
| 228359          | Arhgap1        | Rho GTPase activating p     | 735.1297   | 1775.08887 | 5838.66895 |
| 16400           | Itga3          | integrin alpha 3            | 88.6596451 | 432.78479  | 5826.73389 |
| 56449           | Csda           | cold shock domain prote     | 430.187408 | 1127.72253 | 5819.14648 |
| 20708           | Serpinc6b      | serine (or cysteine) pepti  | 50         | 989.135376 | 5805.64062 |
| 27214           | Dbf4           | DBF4 homolog (S. cerevi     | 62.8023643 | 248.895554 | 5711.30078 |
| 227620          | Uap1l1         | UDP-N-acteylglucosami       | 227.61441  | 2700.13037 | 5639.125   |
| 12798           | Cnn2           | calponin 2                  | 190.922791 | 600.762756 | 5628.02637 |
| 19041           | Ppl            | periplakin                  | 436.253296 | 2294.3667  | 5547.37939 |



|        |           |                             |            |            |            |
|--------|-----------|-----------------------------|------------|------------|------------|
| 12336  | Capns1    | calpain, small subunit 1    | 610.480225 | 1458.68579 | 5533.05518 |
| 121022 | Mrps6     | mitochondrial ribosomal     | 801.65332  | 1973.47192 | 5530.93848 |
| 73916  | Ift57     | intraflagellar transport 57 | 135.89093  | 542.729614 | 5503.9873  |
| 104458 | Rars      | arginyl-tRNA synthetase     | 412.474487 | 937.113281 | 5501.94824 |
| 16998  | Ltbp3     | latent transforming growth  | 108.305283 | 1172.04138 | 5493.8501  |
| 12334  | Capn2     | calpain 2                   | 815.435852 | 2047.18713 | 5425.18945 |
| 330171 | Kctd10    | potassium channel tetram    | 499.784393 | 1269.69653 | 5282.41016 |
| 23789  | Coro1b    | coronin, actin binding pr   | 1107.66333 | 2288.16455 | 5250.55078 |
| 76453  | Prss23    | protease, serine, 23        | 288.602875 | 1322.79785 | 5178.68359 |
| 14156  | Fen1      | flap structure specific en  | 166.096832 | 344.570068 | 5175.69824 |
| 69051  | Pycr2     | pyrroline-5-carboxylate r   | 219.927887 | 715.452515 | 5169.22168 |
| 140559 | Igsf8     | immunoglobulin superfa      | 186.165466 | 759.520996 | 5120.37109 |
| 11848  | Rhoa      | ras homolog gene family     | 629.519165 | 1832.70886 | 5082.56396 |
| 66059  | Krtcap2   | keratinocyte associated p   | 1077.90259 | 2309.8125  | 5076.21924 |
| 326618 | Tpm4      | tropomyosin 4               | 236.012253 | 1126.36865 | 5057.08984 |
| 21873  | Tjp2      | tight junction protein 2    | 563.20459  | 1677.70679 | 5041.87305 |
| 76522  | Naa38     | N(alpha)-acetyltransferas   | 244.709503 | 701.131348 | 5011.31006 |
| 16881  | Lig1      | ligase I, DNA, ATP-depe     | 279.751953 | 669.433105 | 5001.83008 |
| 21335  | Tacc3     | transforming, acidic coile  | 50         | 242.692017 | 4993.16992 |
| 12315  | Calm3     | calmodulin 3                | 1065.02002 | 2218.927   | 4982.55127 |
| 51792  | Ppp2r1a   | protein phosphatase 2 (fc   | 733.401367 | 1919.34619 | 4979.83691 |
| 56434  | Tspan3    | tetraspanin 3               | 57.970562  | 265.330322 | 4934.81445 |
| 21857  | Timp1     | tissue inhibitor of metall  | 50         | 802.012024 | 4932.34961 |
| 11746  | Anxa4     | annexin A4                  | 624.657227 | 1260.4187  | 4931.77051 |
| 329384 | Ptrh1     | peptidyl-tRNA hydrolase     | 54.936821  | 515.306702 | 4907.58203 |
| 17191  | Mbd2      | methyl-CpG binding dom      | 678.139771 | 1522.83337 | 4867.20166 |
| 67203  | Nde1      | nuclear distribution gene   | 1072.01575 | 2171.18164 | 4863.49609 |
| 107373 | Fam111a   | family with sequence sim    | 87.3495178 | 194.689209 | 4828.21191 |
| 74202  | Fblim1    | filamin binding LIM pro     | 50         | 477.610138 | 4823.5957  |
| 51797  | Ctps      | cytidine 5'-triphosphate s  | 140.622925 | 757.008423 | 4735.09082 |
| 245446 | Slitrk4   | SLIT and NTRK-like far      | 50         | 113.7136   | 4725.43994 |
| 94352  | Loxl2     | lysyl oxidase-like 2        | 246.965393 | 1832.06665 | 4721.87793 |
| 21973  | Top2a     | topoisomerase (DNA) II      | 50         | 147.809723 | 4649.19922 |
| 13197  | Gadd45a   | growth arrest and DNA-d     | 356.157837 | 1937.36121 | 4616.05762 |
| 18701  | Pigf      | phosphatidylinositol gly    | 812.600159 | 1704.7915  | 4599.24219 |
| 15469  | Prmt1     | protein arginine N-methy    | 318.425415 | 955.852661 | 4568.04297 |
| 20719  | Serpinb6a | serine (or cysteine) pepti  | 158.296234 | 1253.90967 | 4563.30176 |
| 13007  | Csrp1     | cysteine and glycine-rich   | 371.828735 | 919.89624  | 4539.37109 |
| 56405  | Dusp14    | dual specificity phosphat   | 50         | 176.699677 | 4501.55469 |
| 56200  | Ddx21     | DEAD (Asp-Glu-Ala-As        | 442.540985 | 914.316528 | 4494.58203 |
| 11853  | Rhoc      | ras homolog gene family     | 344.387238 | 859.844238 | 4490.48535 |
| 27357  | Gyg       | glycogenin                  | 294.36142  | 1359.25098 | 4453.84863 |
| 76252  | Atp6v0e2  | ATPase, H+ transporting     | 176.901062 | 1621.92017 | 4434.22266 |
| 12585  | Cdr2      | cerebellar degeneration-r   | 97.5311584 | 859.821655 | 4432.04248 |
| 110829 | Lims1     | LIM and senescent cell a    | 400.11615  | 1039.55591 | 4420.16504 |
| 52009  | Hn11      | hematological and neuro     | 308.831482 | 701.663208 | 4380.43359 |
| 12334  | Capn2     | calpain 2                   | 242.29834  | 561.248291 | 4319.71289 |
| 69065  | Chac1     | ChaC, cation transport re   | 97.4313507 | 306.136444 | 4310.09521 |
| 73710  | Tubb2b    | tubulin, beta 2B class IIB  | 50         | 156.638977 | 4303.34473 |
| 213539 | Bag2      | BCL2-associated athanos     | 60.974205  | 263.557678 | 4283.22266 |
| 22319  | Vamp3     | vesicle-associated memb     | 425.455383 | 917.549194 | 4208.35205 |
| 94181  | Nans      | N-acetylneuraminic acid     | 240.051956 | 566.020142 | 4188.82373 |
| 72050  | Kdelc1    | KDEL (Lys-Asp-Glu-Le        | 295.481445 | 882.809326 | 4187.71436 |
| 12018  | Bak1      | BCL2-antagonist/killer 1    | 699.06543  | 1948.82178 | 4180.9668  |
| 22629  | Ywhah     | tyrosine 3-monooxygena      | 232.355927 | 622.754517 | 4165.93604 |
| 14594  | Ggtal     | glycoprotein galactosyltr   | 207.056274 | 586.943787 | 4124.30713 |
| 16582  | Kifc3     | kinesin family member C     | 399.941895 | 1310.24231 | 4119.15723 |
| 223921 | Aaas      | achalasia, adrenocortical   | 394.736206 | 1303.47424 | 4066.27148 |
| 104445 | Cdc42ep1  | CDC42 effector protein 4    | 437.848602 | 1389.30371 | 4043.57495 |
| 67849  | Cdca5     | cell division cycle associ  | 50         | 121.48748  | 4025.72729 |
| 12444  | Ccnd2     | cyclin D2                   | 166.694077 | 356.310822 | 3992.84863 |

|              |               |                             |            |            |            |
|--------------|---------------|-----------------------------|------------|------------|------------|
| 233406       | Prc1          | protein regulator of cytol  | 50         | 292.76593  | 3921.84473 |
| 114774       | Pawr          | PRKC, apoptosis, WT1,       | 443.347351 | 1093.82019 | 3910.97949 |
| 17684        | Cited2        | Cbp/p300-interacting tra    | 646.623718 | 1754.91504 | 3906.08228 |
| 11886        | Asah1         | N-acylsphingosine amid      | 625.598267 | 1882.51685 | 3903.07031 |
| 27280        | Phlda3        | pleckstrin homology-like    | 50         | 166.922546 | 3902.19116 |
| 12406        | Serpinh1      | serine (or cysteine) pepti  | 75.1258392 | 351.019775 | 3891.22217 |
| 94242        | Tinagl1       | tubulointerstitial nephriti | 169.174927 | 378.676086 | 3866.20654 |
| 20620        | Plk2          | polo-like kinase 2 (Dros    | 333.662231 | 1479.54443 | 3840.18896 |
| 13043        | Ctnn          | cortactin                   | 545.665894 | 1668.61157 | 3804.27197 |
| 226351       | Tmem185b      | transmembrane protein 1     | 701.307068 | 1466.85571 | 3785.64868 |
| 76205        | Stard3nl      | STARD3 N-terminal like      | 327.062439 | 743.271484 | 3764.7627  |
| 66578        | 2610039C10Rik | RIKEN cDNA 2610039C         | 130.232178 | 426.776489 | 3764.4292  |
| 67703        | Kirrel3       | kin of IRRE like 3 (Dros    | 237.610703 | 496.52774  | 3759.18384 |
| 99480        | Dnttip2       | deoxynucleotidyltransfer    | 623.446899 | 1524.00903 | 3695.8457  |
| 72621        | Pdzd11        | PDZ domain containing       | 259.089264 | 528.183472 | 3657.60986 |
| 56367        | Scoc          | short coiled-coil protein   | 719.602966 | 1490.68115 | 3637.29102 |
| 11799        | Birc5         | baculoviral IAP repeat-co   | 50         | 111.469856 | 3628.4043  |
| 66665        | 5730528L13Rik | RIKEN cDNA 5730528L         | 50         | 617.363037 | 3616.58252 |
| 19285        | Ptrf          | polymerase I and transcr    | 249.028015 | 507.041931 | 3601.07471 |
| 100678       | Psph          | phosphoserine phosphata     | 50         | 210.153503 | 3598.1499  |
| 76895        | Bicd2         | bicaudal D homolog 2 (D     | 781.694031 | 1606.16736 | 3586.08154 |
| 223593       | E430025E21Rik | RIKEN cDNA E430025E         | 492.984985 | 1238.45532 | 3577.15723 |
| 81703        | Jdp2          | Jun dimerization protein    | 114.456726 | 606.783813 | 3571.44678 |
| 15937        | Ier3          | immediate early respons     | 50         | 753.531006 | 3468.35107 |
| 68151        | Wls           | wntless homolog (Droso      | 70.7471161 | 262.629639 | 3441.99463 |
| 106878       | 2010002N04Rik | RIKEN cDNA 2010002N         | 59.2410889 | 380.052612 | 3436.33374 |
| 64143        | Ralb          | v-ral simian leukemia vi    | 342.573334 | 1023.80865 | 3427.34668 |
| 17219        | Mcm6          | minichromosome mainte       | 108.374992 | 225.208923 | 3423.85303 |
| 20405        | Sh3gl1        | SH3-domain GRB2-like        | 480.587097 | 1102.74414 | 3404.99512 |
| 77125        | Il33          | interleukin 33              | 50         | 367.441833 | 3401.31567 |
| 29856        | Smtn          | smoothelin                  | 145.763641 | 525.038574 | 3319.87012 |
| 68682        | Slc44a2       | solute carrier family 44,   | 458.913696 | 1023.34888 | 3318.73779 |
| 108013       | Celf4         | CUGBP, Elav-like famil      | 83.7882385 | 236.463013 | 3310.00073 |
| 661281170755 | Mrps36lSgk3   | mitochondrial ribosomal     | 414.790588 | 1072.81873 | 3306.20801 |
| 12428        | Ccna2         | cyclin A2                   | 50         | 211.244247 | 3305.70703 |
| 11799        | Birc5         | baculoviral IAP repeat-co   | 50         | 127.297729 | 3305.62158 |
| 68201        | Ccdc34        | coiled-coil domain conta    | 50         | 229.850616 | 3291.53198 |
| 72657        | 2700094K13Rik | RIKEN cDNA 2700094K         | 201.348419 | 559.199768 | 3285.77881 |
| 75416        | Nop14         | NOP14 nucleolar protein     | 700.320129 | 1489.89868 | 3249.87012 |
| 110033       | Kif22         | kinesin family member 2     | 65.4970856 | 272.958496 | 3232.24268 |
| 17427        | Mns1          | meiosis-specific nuclear    | 50         | 111.865982 | 3219.37451 |
| 237107       | Gnl3l         | guanine nucleotide bindi    | 459.640808 | 1103.89575 | 3202.1167  |
| 14793        | Cdca3         | cell division cycle associ  | 50         | 215.938293 | 3197.64697 |
| 20135        | Rrm2          | ribonucleotide reductase    | 50         | 447.213501 | 3187.52783 |
| 59003        | Maea          | macrophage erythroblast     | 496.357788 | 1390.72559 | 3139.84668 |
| 98053        | Gtf2f1        | general transcription fact  | 569.778992 | 1172.5238  | 3121.34521 |
| 12488        | Cd2ap         | CD2-associated protein      | 497.702759 | 1174.04468 | 3109.10254 |
| 66609        | Cryz1l        | crystallin, zeta (quinone   | 332.103363 | 982.450806 | 3092.72583 |
| 67306        | Fam164a       | family with sequence sim    | 76.4708252 | 365.964844 | 3085.34424 |
| 20677        | Sox4          | SRY-box containing gen      | 50.6182938 | 434.966309 | 3084.74268 |
| 223752       | Gramd4        | GRAM domain containin       | 649.717651 | 1307.49927 | 3070.08008 |
| 17873        | Gadd45b       | growth arrest and DNA-d     | 629.03595  | 1372.35266 | 3069.88916 |
| 101772       | Ano1          | anoctamin 1, calcium act    | 50         | 113.508469 | 3052.36719 |
| 107094       | Rrp12         | ribosomal RNA processi      | 433.52533  | 926.330322 | 3049.21851 |
| 70123        | 2210013O21Rik | RIKEN cDNA 2210013O         | 110.860596 | 690.301636 | 3048.49561 |
| 56150        | Mad2l1        | MAD2 mitotic arrest def     | 50         | 153.013062 | 3044.81128 |
| 14700        | Gng10         | guanine nucleotide bindi    | 654.135986 | 1337.09082 | 3010.39795 |
| 52033        | Pbk           | PDZ binding kinase          | 50         | 187.635437 | 3008.00879 |
| 56297        | Arl6          | ADP-ribosylation factor-    | 153.668793 | 362.83551  | 2989.49878 |
| 11854        | Rhod          | ras homolog gene family     | 347.809082 | 794.912964 | 2971.20752 |
| 15979        | Ifngr1        | interferon gamma recept     | 164.377991 | 705.697998 | 2956.89307 |

|                 |                |                            |            |            |            |
|-----------------|----------------|----------------------------|------------|------------|------------|
| 66964           | Golt1b         | golgi transport 1 homolo   | 195.754608 | 796.928955 | 2939.93945 |
| 66468           | Ska1           | spindle and kinetochore    | 50         | 136.490555 | 2914.03809 |
| 13803           | Enc1           | ectodermal-neural cortex   | 422.36145  | 992.182617 | 2908.67773 |
| 100045148114000 | LOC1000451481D | ribonuclease 3-like dros   | 264.369385 | 903.145935 | 2889.31836 |
| 64540           | Tspan4         | tetraspanin 4              | 317.145386 | 719.35144  | 2884.73047 |
| 20775           | Sqle           | squalene epoxidase         | 582.262451 | 1287.65637 | 2873.75171 |
| 19255           | Ptpn2          | protein tyrosine phosphat  | 439.71637  | 951.117554 | 2840.28003 |
| 78372           | Snmp25         | small nuclear ribonucleo   | 226.762115 | 567.178772 | 2808.1228  |
| 65106           | Arl6ip5        | ADP-ribosylation factor    | 378.911682 | 1171.04114 | 2798.76758 |
| 72388           | Ripk4          | receptor-interacting serin | 426.142944 | 1380.49438 | 2795.90186 |
| 226251          | Ablim1         | actin-binding LIM protei   | 230.627563 | 718.250854 | 2792.32959 |
| 98386           | Lbr            | lamin B receptor           | 622.589844 | 1258.36316 | 2789.94653 |
| 27279           | Tnfrsf12a      | tumor necrosis factor rec  | 132.747879 | 582.512878 | 2776.83667 |
| 22200           | Uba3           | ubiquitin-like modifier ac | 482.00177  | 1111.48584 | 2771.92651 |
| 67678           | Lsm3           | LSM3 homolog, U6 sma       | 180.671448 | 424.44928  | 2715.02661 |
| 21929           | Tnfaip3        | tumor necrosis factor, al  | 150.600204 | 936.3479   | 2710.80835 |
| 80286           | Tusc3          | tumor suppressor candid    | 93.9445343 | 222.543594 | 2710.54541 |
| 56772           | Mllt11         | myeloid/lymphoid or mi     | 85.660759  | 338.762665 | 2699.58984 |
| 67177           | Cdt1           | chromatin licensing and    | 97.1873856 | 324.587189 | 2669.0708  |
| 216829          | Mmgt2          | membrane magnesium tr      | 89.212532  | 447.694519 | 2668.47754 |
| 208092          | Chmp6          | charged multivesicular b   | 216.645416 | 458.773193 | 2632.43091 |
| 100608          | Noc4l          | nucleolar complex associ   | 304.996155 | 668.345215 | 2614.20361 |
| 69161           | Manbal         | mannosidase, beta A, lys   | 332.546936 | 769.346191 | 2594.66211 |
| 12400           | Cbfb           | core binding factor beta   | 456.204681 | 1271.23145 | 2575.91382 |
| 58859           | Efemp2         | epidermal growth factor    | 64.2867584 | 200.464096 | 2566.09033 |
| 15200           | Hbegf          | heparin-binding EGF-lik    | 50         | 210.043152 | 2549.2666  |
| 67249           | Tbc1d19        | TBC1 domain family, m      | 85.6259079 | 300.546875 | 2548.10815 |
| 67399           | Pdlim7         | PDZ and LIM domain 7       | 119.632309 | 530.144287 | 2543.67627 |
| 17755           | Mtap1b         | microtubule-associated p   | 50         | 103.565834 | 2534.07617 |
| 11603           | Agri           | agrin                      | 344.422089 | 833.995972 | 2530.54639 |
| 18105           | Nqo2           | NAD(P)H dehydrogenas       | 504.690674 | 1116.63953 | 2518.99609 |
| 74257           | Tspan17        | tetraspanin 17             | 78.4780121 | 273.36734  | 2518.60156 |
| 19108           | Prkx           | protein kinase, X-linked   | 378.224121 | 975.998291 | 2499.4707  |
| 16978           | Lrrfip1        | leucine rich repeat (in FI | 341.86676  | 984.203613 | 2464.79932 |
| 14187           | Akr1b8         | aldo-keto reductase fami   | 151.431915 | 318.64679  | 2430.91016 |
| 11769           | Apl1s1         | adaptor protein complex    | 155.362305 | 370.518829 | 2430.81152 |
| 83554           | Fstl3          | follistatin-like 3         | 50         | 324.366516 | 2427.04346 |
| 21982           | Tmem165        | transmembrane protein 1    | 144.379059 | 413.724304 | 2410.80957 |
| 97165           | Hmgb2          | high mobility group box    | 61.3528214 | 176.689758 | 2397.87549 |
| 105348          | Golm1          | golgi membrane protein     | 50         | 425.948883 | 2394.99805 |
| 12286           | Cacna1a        | calcium channel, voltage   | 69.2579727 | 189.64151  | 2394.87646 |
| 20198           | S100a4         | S100 calcium binding pr    | 157.638794 | 394.734558 | 2380.04932 |
| 227700          | Sh3glb2        | SH3-domain GRB2-like       | 238.428162 | 598.292664 | 2344.8042  |
| 21985           | Tpd52          | tumor protein D52          | 167.376862 | 626.217773 | 2326.87939 |
| 74451           | Pgs1           | phosphatidylglycerophos    | 234.736969 | 567.850708 | 2323.58154 |
| 83396           | Glis2          | GLIS family zinc finger    | 50         | 274.415649 | 2314.58936 |
| 70235           | Poc1a          | POC1 centriolar protein    | 249.53653  | 541.031982 | 2312.78516 |
| 53605           | Nap111         | nucleosome assembly pr     | 216.331757 | 716.82196  | 2310.75098 |
| 52713           | Ccdc59         | coiled-coil domain conta   | 343.002655 | 815.535278 | 2306.7627  |
| 66441           | Magohb         | mago-nashi homolog B (     | 50         | 157.1129   | 2292.89844 |
| 226101          | Myof           | myoferlin                  | 111.727158 | 249.34967  | 2289.16968 |
| 56233           | Hdac7          | histone deacetylase 7      | 223.31015  | 598.026672 | 2284.30737 |
| 29858           | Pmm1           | phosphomannomutase 1       | 280.239899 | 769.590942 | 2270.43164 |
| 12444           | Ccnd2          | cyclin D2                  | 171.486267 | 382.045959 | 2235.73242 |
| 105298          | Epdr1          | ependymin related protei   | 50         | 171.840118 | 2211.43652 |
| 226419          | Dyrk3          | dual-specificity tyrosine  | 100.400139 | 601.158875 | 2209.9165  |
| 19703           | Renbp          | renin binding protein      | 266.018555 | 1015.19727 | 2207.25439 |
| 20818           | Srprb          | signal recognition particl | 381.889954 | 764.415894 | 2205.67188 |
| 79201           | Tnfrsf23       | tumor necrosis factor rec  | 75.2652512 | 164.046432 | 2203.53418 |
| 26417           | Mapk3          | mitogen-activated protei   | 218.169434 | 446.054871 | 2202.81592 |
| 65964           | B230120H23Rik  | RIKEN cDNA B230120         | 184.776108 | 393.10199  | 2198.58594 |

|        |               |                            |            |            |            |
|--------|---------------|----------------------------|------------|------------|------------|
| 27416  | Abcc5         | ATP-binding cassette, su   | 171.077545 | 923.670654 | 2182.6167  |
| 239273 | Abcc4         | ATP-binding cassette, su   | 122.596344 | 602.385376 | 2182.21094 |
| 22154  | Tubb5         | tubulin, beta 5 class I    | 161.822662 | 325.898621 | 2173.73975 |
| 67267  | 2900010M23Rik | RIKEN cDNA 2900010M        | 355.57959  | 772.924011 | 2159.6521  |
| 26362  | Axl           | AXL receptor tyrosine ki   | 206.359222 | 703.325562 | 2133.4436  |
| 216963 | Git1          | G protein-coupled recept   | 214.090118 | 688.912354 | 2128.66504 |
| 17345  | Mki67         | antigen identified by mo   | 50         | 226.961761 | 2120.0625  |
| 448850 | Znhit3        | zinc finger, HIT type 3    | 286.939453 | 644.921753 | 2116.87769 |
| 13872  | Ercc3         | excision repair cross-con  | 361.656586 | 929.465332 | 2083.23682 |
| 106795 | Tcf19         | transcription factor 19    | 50         | 126.07399  | 2071.31958 |
| 16477  | Junb          | Jun-B oncogene             | 263.563049 | 641.085022 | 2060.27856 |
| 67203  | Nde1          | nuclear distribution gene  | 220.849884 | 452.378662 | 2030.5387  |
| 20877  | Aurkb         | aurora kinase B            | 50         | 121.113998 | 2028.07544 |
| 73112  | 3110003A17Rik | RIKEN cDNA 3110003A        | 247.652939 | 608.315918 | 2025.92773 |
| 107449 | Unc5b         | unc-5 homolog B (C. ele    | 69.8457108 | 915.036621 | 2015.19214 |
| 17776  | Mast2         | microtubule associated s   | 290.252014 | 997.671753 | 2006.88379 |
| 19332  | Rab20         | RAB20, member RAS o        | 227.623932 | 863.781433 | 1994.03662 |
| 19376  | Rab34         | RAB34, member of RAS       | 63.0415802 | 397.259827 | 1992.23401 |
| 224105 | Pak2          | p21 protein (Cdc42/Rac)    | 377.805908 | 926.094116 | 1983.60193 |
| 16319  | Incenp        | inner centromere protein   | 50         | 182.961212 | 1980.02954 |
| 12927  | Bcar1         | breast cancer anti-estroge | 138.929428 | 302.961823 | 1966.39697 |
| 17876  | Myef2         | myelin basic protein exp   | 50         | 106.178818 | 1947.35132 |
| 270685 | Mthfd1l       | methylenetetrahydrofolat   | 50         | 311.580261 | 1941.922   |
| 11845  | Arf6          | ADP-ribosylation factor    | 251.887482 | 635.96936  | 1937.34546 |
| 69692  | Hddc2         | HD domain containing 2     | 84.694397  | 402.349976 | 1933.70239 |
| 613262 | BC029722      | cDNA sequence BC0297       | 248.440277 | 629.10376  | 1904.08899 |
| 18767  | Pkia          | protein kinase inhibitor,  | 50         | 126.437576 | 1902.52124 |
| 66120  | Fkbp11        | FK506 binding protein 11   | 145.559296 | 814.181396 | 1890.84253 |
| 12579  | Cdkn2b        | cyclin-dependent kinase    | 50         | 151.734146 | 1889.47205 |
| 18817  | Plk1          | polo-like kinase 1 (Dros   | 50         | 216.093903 | 1879.41528 |
| 67429  | Nudcd1        | NudC domain containing     | 200.934937 | 561.920288 | 1869.6394  |
| 67936  | Wdr55         | WD repeat domain 55        | 211.016769 | 438.303619 | 1865.34558 |
| 53886  | Cdk12         | cyclin-dependent kinase-   | 251.827301 | 835.748779 | 1861.73535 |
| 66583  | Exosc1        | exosome component 1        | 213.019196 | 645.78186  | 1859.6073  |
| 218138 | Gmms          | GDP-mannose 4, 6-dehy      | 86.5526581 | 177.735229 | 1859.48071 |
| 66061  | Tctex1d2      | Tctex1 domain containin    | 142.241974 | 463.60022  | 1852.81885 |
| 100929 | Tyw1          | tRNA-yW synthesizing p     | 317.075684 | 773.352661 | 1837.05347 |
| 17215  | Mcm3          | minichromosome mainte      | 50         | 100.358665 | 1835.6123  |
| 192662 | Arhgdia       | Rho GDP dissociation in    | 209.73674  | 547.536804 | 1825.26953 |
| 56356  | Gltp          | glycolipid transfer protei | 101.540756 | 417.077209 | 1816.50427 |
| 17876  | Myef2         | myelin basic protein exp   | 50         | 228.659424 | 1807.73584 |
| 12337  | Capn5         | calpain 5                  | 153.115906 | 469.235016 | 1805.62085 |
| 72275  | 2200002D01Rik | RIKEN cDNA 2200002I        | 106.302856 | 692.184631 | 1802.82739 |
| 227522 | Rpp38         | ribonuclease P/MRP 38 s    | 202.519135 | 442.315765 | 1799.08069 |
| 20525  | Slc2a1        | solute carrier family 2 (f | 59.8034782 | 788.4505   | 1798.60583 |
| 16897  | Lgl1          | lethal giant larvae homol  | 319.905029 | 751.86731  | 1792.18066 |
| 227059 | Slc39a10      | solute carrier family 39 ( | 50         | 103.543198 | 1785.70947 |
| 104346 | Gas8          | growth arrest specific 8   | 107.373779 | 332.436035 | 1781.03101 |
| 18476  | Pafah1b3      | platelet-activating factor | 50         | 381.286255 | 1778.95886 |
| 68475  | Ssna1         | Sjogren's syndrome nucle   | 231.329346 | 538.068115 | 1761.70776 |
| 15468  | Prmt2         | protein arginine N-methy   | 50         | 131.761154 | 1759.54529 |
| 18582  | Pde6d         | phosphodiesterase 6D, c    | 145.763641 | 328.699768 | 1758.6792  |
| 53890  | Sart3         | squamous cell carcinoma    | 370.353821 | 781.675415 | 1755.58008 |
| 76273  | Ndfip2        | Nedd4 family interacting   | 307.412048 | 635.771362 | 1755.52905 |
| 319757 | Smo           | smoothened homolog (D      | 174.285553 | 696.239197 | 1754.4248  |
| 109711 | Actn1         | actinin, alpha 1           | 172.287872 | 585.797852 | 1726.31836 |
| 12380  | Cast          | calpastatin                | 191.445587 | 644.104004 | 1717.81934 |
| 208943 | Myo5c         | myosin VC                  | 50         | 318.539276 | 1706.13574 |
| 103468 | Nup107        | nucleoporin 107            | 71.2255478 | 144.040909 | 1705.49316 |
| 13642  | Efnb2         | ephrin B2                  | 77.8902664 | 184.83429  | 1700.30371 |
| 57373  | D930014E17Rik | RIKEN cDNA D930014         | 287.452759 | 608.030151 | 1685.88562 |

|                  |                 |                            |            |            |            |
|------------------|-----------------|----------------------------|------------|------------|------------|
| 20018            | Polr1d          | polymerase (RNA) I pol     | 294.0224   | 591.890991 | 1678.42358 |
| 17869            | Myc             | myelocytomatosis oncog     | 50         | 578.578552 | 1663.73267 |
| 68948            | 1500011H22Rik   | RIKEN cDNA 1500011H        | 50         | 138.749863 | 1656.44971 |
| 72729            | Cdc42se2        | CDC42 small effector 2     | 216.570969 | 491.808258 | 1656.41357 |
| 69787            | Anxa13          | annexin A13                | 50         | 151.315399 | 1647.5564  |
| 232566           | Amn1            | antagonist of mitotic exit | 390.851746 | 789.423828 | 1646.68872 |
| 11987            | Slc7a1          | solute carrier family 7 (c | 50         | 114.203094 | 1643.31348 |
| 110208           | Pgd             | phosphogluconate dehyd     | 117.625122 | 502.523315 | 1638.8667  |
| 19826            | Rnps1           | ribonucleic acid binding   | 50         | 131.475388 | 1626.06396 |
| 18034            | Nfkb2           | nuclear factor of kappa b  | 127.746567 | 537.837524 | 1618.03662 |
| 17089            | Lyar            | Lyl antibody reactive cl   | 256.828613 | 540.95697  | 1616.25696 |
| 16452            | Jak2            | Janus kinase 2             | 149.942764 | 390.566803 | 1615.91357 |
| 21753            | Tes             | testis derived transcript  | 50         | 155.934448 | 1611.66406 |
| 77305            | Wdr82           | WD repeat domain conta     | 240.99295  | 508.827301 | 1607.13513 |
| 67936            | Wdr55           | WD repeat domain 55        | 273.340698 | 561.880615 | 1573.40869 |
| 105372           | Utp15           | UTP15, U3 small nucleo     | 284.753296 | 579.786743 | 1562.72095 |
| 68298            | Ncapd2          | non-SMC condensin I co     | 103.090103 | 308.574005 | 1559.80396 |
| 14825            | Cxcl1           | chemokine (C-X-C motif     | 158.15683  | 751.421692 | 1559.68237 |
| 56306            | Fam60a          | family with sequence sim   | 50         | 135.101303 | 1556.87402 |
| 12709            | Ckb             | creatine kinase, brain     | 58.6581039 | 161.037323 | 1549.03247 |
| 20617            | Snca            | synuclein, alpha           | 50         | 156.418274 | 1546.63818 |
| 9371519370219370 | Pcdhga7/Pcdhgb5 | protocadherin gamma su     | 269.091888 | 641.669312 | 1535.505   |
| 66147            | Necap2          | NECAP endocytosis asso     | 253.10257  | 542.534363 | 1535.00537 |
| 232210           | 8430410A17Rik   | RIKEN cDNA 8430410A        | 267.50769  | 603.687012 | 1534.2627  |
| 59015            | Nup160          | nucleoporin 160            | 98.123642  | 249.778336 | 1531.50525 |
| 19822            | Rnf4            | ring finger protein 4      | 178.11615  | 356.233002 | 1527.54175 |
| 384009           | Glpr2           | GLI pathogenesis-related   | 50         | 413.568695 | 1524.48853 |
| 107047           | Psmg2           | proteasome (prosome, m     | 297.235168 | 663.44751  | 1524.41626 |
| 56070            | Tcerg1          | transcription elongation   | 221.207916 | 495.940643 | 1523.3562  |
| 94352            | Loxl2           | lysyl oxidase-like 2       | 50         | 148.757568 | 1520.3031  |
| 12305            | Ddr1            | discoidin domain recept    | 50         | 407.926819 | 1516.85718 |
| 78749            | Filip11         | filamin A interacting pro  | 115.244072 | 356.551331 | 1507.43958 |
| 67429            | Nudcd1          | NudC domain containing     | 81.4467926 | 184.184937 | 1505.88672 |
| 106672           | AI413582        | expressed sequence AI41    | 169.344452 | 677.969604 | 1504.68872 |
| 101631           | Pwwp2b          | PWWP domain containin      | 80.8289566 | 199.782196 | 1499.52881 |
| 68262            | Agpat4          | 1-acylglycerol-3-phosph    | 102.1586   | 211.695541 | 1494.06335 |
| 56693            | Crtap           | cartilage associated prote | 161.025818 | 626.613892 | 1491.18433 |
| 67629            | Spc24           | SPC24, NDC80 kinetoch      | 109.271652 | 219.102997 | 1485.72705 |
| 23999            | Twf2            | twinfilin, actin-binding p | 50         | 296.635193 | 1478.61169 |
| 19221            | Ptgfrn          | prostaglandin F2 recepto   | 85.0334167 | 535.422607 | 1470.36243 |
| 225348           | Wdr36           | WD repeat domain 36        | 220.20195  | 520.529846 | 1469.38635 |
| 214459           | Fnbp11          | formin binding protein 1   | 187.545288 | 487.3349   | 1469.25977 |
| 76594            | Dnajc18         | DnaJ (Hsp40) homolog,      | 150.490906 | 413.967651 | 1461.11414 |
| 320078           | Olfml2b         | olfactomedin-like 2B       | 50         | 229.045639 | 1444.77344 |
| 94280            | Sfxn3           | sideroflexin 3             | 83.553772  | 283.242065 | 1444.70435 |
| 105837           | Mtbp            | Mdm2, transformed 3T3      | 50         | 102.838669 | 1429.47949 |
| 18793            | Plaur           | plasminogen activator, u   | 50         | 174.914291 | 1423.4585  |
| 67877            | Naa20           | N(alpha)-acetyltransferas  | 153.294922 | 320.519897 | 1417.60864 |
| 16475            | Jub             | ajuba                      | 67.6690216 | 441.280182 | 1415.66455 |
| 17974            | Nck2            | non-catalytic region of ty | 117.455612 | 369.593628 | 1410.94019 |
| 20773            | Sptlc2          | serine palmitoyltransfera  | 107.647842 | 624.715332 | 1398.97058 |
| 20733            | Spint2          | serine protease inhibitor, | 232.49057  | 631.694092 | 1388.86108 |
| 67824            | Nmral1          | NmrA-like family domai     | 174.21109  | 515.076111 | 1376.97375 |
| 16569            | Kif3b           | kinesin family member 3    | 251.996811 | 579.014282 | 1376.96387 |
| 51793            | Ddah2           | dimethylarginine dimeth    | 251.922348 | 567.597534 | 1371.97327 |
| 20556            | Slfn2           | schlafen 2                 | 104.679062 | 407.287354 | 1363.57935 |
| 70472            | Atad2           | ATPase family, AAA do      | 50         | 140.447525 | 1353.47998 |
| 18432            | Mybbp1a         | MYB binding protein (P     | 163.341919 | 328.015045 | 1352.45288 |
| 13555            | E2f1            | E2F transcription factor   | 50         | 181.240906 | 1348.18701 |
| 102545           | Cmtm7           | CKLF-like MARVEL tra       | 95.5683289 | 261.330933 | 1343.60217 |
| 72662            | Dis3            | DIS3 mitotic control hor   | 205.492676 | 458.055908 | 1333.59631 |

|        |               |                             |            |            |            |
|--------|---------------|-----------------------------|------------|------------|------------|
| 50766  | Crim1         | cysteine rich transmembr    | 92.5947876 | 330.362061 | 1332.68921 |
| 217333 | Trim47        | tripartite motif-containin  | 82.6523666 | 258.727844 | 1323.65625 |
| 320394 | Cenpt         | centromere protein T        | 75.7832794 | 350.490662 | 1318.28589 |
| 72425  | 2410042D21Rik | RIKEN cDNA 2410042I         | 114.521683 | 329.790527 | 1311.18701 |
| 107566 | Arl2bp        | ADP-ribosylation factor-    | 89.4564972 | 643.389587 | 1302.01587 |
| 15958  | Ifit2         | interferon-induced protei   | 90.5923691 | 594.212585 | 1287.89697 |
| 114641 | Rpl31         | ribosomal protein L31       | 124.220139 | 344.755402 | 1280.95251 |
| 57444  | Isg20         | interferon-stimulated pro   | 63.6293182 | 570.561401 | 1280.43481 |
| 211323 | Nrg1          | neuregulin 1                | 50         | 315.085938 | 1280.01587 |
| 20362  | Sept8         | septin 8                    | 65.6317444 | 195.922852 | 1271.3147  |
| 243983 | Zdhhc13       | zinc finger, DHHC doma      | 151.636261 | 421.397766 | 1266.44238 |
| 216766 | Gemin5        | gem (nuclear organelle)     | 181.363739 | 450.034485 | 1264.7926  |
| 217125 | Samd14        | sterile alpha motif domai   | 50         | 364.134216 | 1255.05457 |
| 54135  | Lsr           | lipolysis stimulated lipop  | 204.32196  | 476.087891 | 1244.89917 |
| 12390  | Cav2          | caveolin 2                  | 50         | 105.902939 | 1241.79663 |
| 110749 | Chaf1b        | chromatin assembly facto    | 50         | 109.298264 | 1235.03125 |
| 76477  | Pcolce2       | procollagen C-endopepti     | 52.5811195 | 128.631805 | 1227.94727 |
| 67619  | Nob1          | NIN1/RPN12 binding pr       | 143.865784 | 461.073486 | 1226.34827 |
| 71242  | Spata24       | spermatogenesis associat    | 80.5802307 | 608.371094 | 1224.23828 |
| 19088  | Prkar2b       | protein kinase, cAMP de     | 55.0667267 | 331.387756 | 1223.16858 |
| 223626 | 4930572J05Rik | RIKEN cDNA 4930572J         | 50         | 162.689728 | 1212.49048 |
| 27388  | Ptdss2        | phosphatidylserine synth    | 221.53743  | 507.854004 | 1211.4668  |
| 16449  | Jag1          | jagged 1                    | 55.3455429 | 128.498825 | 1206.25928 |
| 67458  | Ergic1        | endoplasmic reticulum-g     | 242.467865 | 485.968323 | 1202.14453 |
| 68815  | Btdb10        | BTB (POZ) domain cont       | 87.3146591 | 196.838165 | 1198.27625 |
| 67588  | Rnf41         | ring finger protein 41      | 123.149223 | 259.740784 | 1197.82275 |
| 76630  | Stambpl1      | STAM binding protein li     | 50         | 210.351562 | 1196.15479 |
| 19250  | Ptpn14        | protein tyrosine phosphat   | 56.9344978 | 353.873291 | 1194.73657 |
| 67920  | Mak16         | MAK16 homolog (S. cer       | 125.80909  | 328.268311 | 1192.3999  |
| 224619 | Traf7         | TNF receptor-associated     | 172.143707 | 396.231323 | 1192.37036 |
| 66569  | Gdpd1         | glycerophosphodiester pl    | 58.075119  | 518.536499 | 1191.18396 |
| 63913  | Fam129a       | family with sequence sin    | 50         | 170.373047 | 1181.85999 |
| 53886  | Cdk12         | cyclin-dependent kinase-    | 207.599655 | 525.560608 | 1180.02783 |
| 108116 | Slco3a1       | solute carrier organic ani  | 50         | 180.536377 | 1177.72876 |
| 17035  | Lxn           | latexin                     | 50         | 390.446564 | 1169.08362 |
| 12048  | Bcl2l1        | BCL2-like 1                 | 137.445023 | 359.901367 | 1161.48511 |
| 75739  | Mpp7          | membrane protein, palmi     | 243.399353 | 494.463684 | 1160.93787 |
| 26944  | Tinag         | tubulointerstitial nephriti | 50         | 287.309387 | 1156.95129 |
| 230145 | Galnt12       | UDP-N-acetyl-alpha-D-g      | 50         | 203.430756 | 1151.69604 |
| 67416  | Armcx2        | armadillo repeat containi   | 104.579254 | 278.778625 | 1150.76282 |
| 58801  | Pmaip1        | phorbol-12-myristate-13-    | 50         | 119.890259 | 1146.61511 |
| 67843  | Slc35a4       | solute carrier family 35,   | 107.40863  | 235.141663 | 1146.59705 |
| 70233  | Cd2bp2        | CD2 antigen (cytoplasmic    | 207.081619 | 430.879181 | 1144.37695 |
| 69940  | Exoc1         | exocyst complex compo       | 238.014679 | 522.240234 | 1143.47656 |
| 21923  | Tnc           | tenascin C                  | 50         | 119.637024 | 1139.91882 |
| 66934  | Dsn1          | DSN1, MIND kinetocho        | 50         | 167.363953 | 1137.63306 |
| 226977 | Actr1b        | ARP1 actin-related prote    | 182.53447  | 407.575958 | 1136.90015 |
| 68549  | Sgol2         | shugoshin-like 2 (S. pom    | 50         | 101.108467 | 1133.34399 |
| 19981  | Rpl37a        | ribosomal protein L37a      | 168.831146 | 459.590881 | 1132.84949 |
| 105844 | Card10        | caspase recruitment dom     | 165.20018  | 342.135376 | 1130.22192 |
| 106869 | Tnfaip8       | tumor necrosis factor, al   | 50         | 157.366135 | 1129.37891 |
| 74838  | Naa15         | N(alpha)-acetyltransferas   | 234.667267 | 560.238159 | 1126.61157 |
| 108927 | Lhfp          | lipoma HMGIC fusion p       | 86.452858  | 355.989685 | 1125.08984 |
| 230972 | Arhgef16      | Rho guanine nucleotide e    | 50         | 234.314056 | 1103.26733 |
| 19716  | Bex1          | brain expressed gene 1      | 50         | 364.523254 | 1086.96606 |
| 13732  | Emp3          | epithelial membrane prot    | 50         | 164.939117 | 1085.54785 |
| 11717  | Ampd3         | adenosine monophosphat      | 56.9043961 | 331.423096 | 1083.95068 |
| 320982 | Arl4c         | ADP-ribosylation factor-    | 50         | 111.083641 | 1082.51941 |
| 22375  | Wars          | tryptophanyl-tRNA synt      | 109.650269 | 223.78714  | 1081.47266 |
| 97487  | Cmtm4         | CKLF-like MARVEL tra        | 173.837219 | 348.238434 | 1075.60779 |
| 56213  | Htra1         | HtrA serine peptidase 1     | 50         | 293.337494 | 1074.27661 |

|                 |                 |                            |            |            |            |
|-----------------|-----------------|----------------------------|------------|------------|------------|
| 72018           | Funde1          | FUN14 domain containi      | 125.565125 | 281.589661 | 1066.07349 |
| 105722          | Ano6            | anoctamin 6                | 71.1257401 | 267.183594 | 1065.69055 |
| 69719           | Cad             | carbamoyl-phosphate syr    | 74.40345   | 163.053299 | 1057.67969 |
| 19069           | Nup88           | nucleoporin 88             | 147.3526   | 372.524902 | 1057.5564  |
| 74044           | Ttf2            | transcription termination  | 156.602722 | 478.168945 | 1048.00574 |
| 67861           | Akr1b10         | aldo-keto reductase fami   | 86.9360352 | 285.920135 | 1038.18396 |
| 19075           | Prim1           | DNA primase, p49 subun     | 50         | 100.877869 | 1024.69434 |
| 11443           | Chrnbl          | cholinergic receptor, nicc | 50         | 143.015228 | 1018.37103 |
| 13017           | Ctbp2           | C-terminal binding prote   | 66.7723694 | 179.124496 | 1014.77881 |
| 20088           | Rps24           | ribosomal protein S24      | 151.322601 | 410.007874 | 1012.15613 |
| 12589           | Ift81           | intraflagellar transport 8 | 89.6260071 | 228.351013 | 1009.88843 |
| 72391           | Cdkn3           | cyclin-dependent kinase    | 50         | 156.09996  | 1008.49988 |
| 19889           | Rp2h            | retinitis pigmentosa 2 ho  | 78.0692825 | 174.154602 | 1008.46533 |
| 13025           | Ctla2b          | cytotoxic T lymphocyte-    | 139.377747 | 323.451172 | 1007.72095 |
| 18475           | Pafah1b2        | platelet-activating factor | 222.787354 | 471.601837 | 1006.85498 |
| 20621           | Snn             | stannin                    | 68.3613129 | 203.969757 | 1001.18732 |
| 28040           | D6Wsu163e       | DNA segment, Chr 6, W      | 146.316528 | 313.180328 | 994.768677 |
| 66912           | Bzw2            | basic leucine zipper and   | 122.491776 | 368.798553 | 994.147583 |
| 22403           | Wispy2          | WNT1 inducible signalin    | 50         | 303.698883 | 993.891235 |
| 67313           | 5730559C18Rik   | RIKEN cDNA 5730559C        | 50         | 125.467072 | 993.449158 |
| 329540          | 8430427H17Rik   | RIKEN cDNA 8430427H        | 50         | 163.539963 | 981.671875 |
| 56613           | Rps6ka4         | ribosomal protein S6 kin   | 104.60936  | 270.842072 | 977.539001 |
| 22051           | Trip6           | thyroid hormone recepto    | 188.202728 | 462.632507 | 971.480225 |
| 98170           | Tmem132a        | transmembrane protein 1    | 50.1303635 | 128.300751 | 971.376709 |
| 26356           | Ing1            | inhibitor of growth famil  | 156.019745 | 416.99939  | 969.818909 |
| 94249           | Slc24a3         | solute carrier family 24 ( | 71.8481369 | 241.325394 | 966.400879 |
| 66681           | Pgm1            | phosphoglucomutase 1       | 62.3239403 | 302.091766 | 966.087036 |
| 72440           | 5930416I19Rik   | RIKEN cDNA 5930416I        | 89.5214539 | 284.751587 | 959.541931 |
| 432486          | Gnptab          | N-acetylglucosamine-1-p    | 121.216499 | 329.501923 | 958.408081 |
| 56449           | Csda            | cold shock domain prote    | 70.2940369 | 193.134445 | 956.477173 |
| 15547           | Trmt2a          | TRM2 tRNA methyltran       | 134.541199 | 322.506165 | 955.683533 |
| 227753          | Gsn             | gelsolin                   | 118.21286  | 305.993561 | 950.687988 |
| 52690           | Setd3           | SET domain containing      | 50         | 266.015045 | 949.503174 |
| 18983           | Cnot7           | CCR4-NOT transcriptior     | 183.271118 | 424.341766 | 946.926514 |
| 23790           | Coro1c          | coronin, actin binding pr  | 142.416229 | 321.535645 | 946.752319 |
| 226154          | Lzts2           | leucine zipper, putative t | 177.110168 | 390.621979 | 945.613525 |
| 21427           | Vps72           | vacuolar protein sorting   | 218.369034 | 469.861755 | 944.706421 |
| 14063           | F2rl1           | coagulation factor II (thr | 50         | 111.304337 | 944.246338 |
| 97031           | Tpm             | taperin                    | 50         | 302.46524  | 943.027039 |
| 170643          | Kirrel          | kin of IRRE like (Droso    | 52.2024956 | 173.106293 | 939.334595 |
| 579151100862515 | Tbc1d11LOC10086 | TBC1 domain family, m      | 167.033081 | 345.329773 | 937.398804 |
| 16776           | Lama5           | laminin, alpha 5           | 50         | 363.660278 | 930.260498 |
| 51812           | Mcrs1           | microspherule protein 1    | 120.912338 | 273.036285 | 928.370728 |
| 102693          | Phldb1          | pleckstrin homology-like   | 50         | 173.216644 | 927.039673 |
| 68501           | Nsmce2          | non-SMC element 2 hon      | 91.4240723 | 190.235687 | 926.359375 |
| 72843           | Prdm4           | PR domain containing 4     | 90.8363342 | 204.61911  | 921.894592 |
| 57278           | Bcam            | basal cell adhesion mole   | 62.7025604 | 257.140503 | 921.115662 |
| 81601           | Kat5            | K(lysine) acetyltransfera  | 79.0958405 | 176.887817 | 920.499451 |
| 69941           | 2810408I11Rik   | RIKEN cDNA 2810408I        | 103.090103 | 266.719574 | 914.309265 |
| 494448          | Cbx6            | chromobox homolog 6        | 114.242859 | 312.771484 | 910.343994 |
| 71709           | Syde1           | synapse defective 1, Rho   | 79.8879395 | 188.119263 | 901.212402 |
| 329165          | Abi2            | abl-interactor 2           | 90.7666321 | 256.370911 | 900.729248 |
| 68401           | G6pc3           | glucose 6 phosphatase, c   | 134.301971 | 305.143311 | 900.165649 |
| 19296           | Pvt1            | plasmacytoma variant tra   | 50         | 185.827423 | 898.083618 |
| 225870          | Rin1            | Ras and Rab interactor 1   | 114.730797 | 249.327026 | 895.852051 |
| 118445          | Klf16           | Kruppel-like factor 16     | 122.14801  | 329.23877  | 893.549805 |
| 13078           | Cyp1b1          | cytochrome P450, family    | 50         | 288.134155 | 890.498291 |
| 66617           | Mettl1a         | methyltransferase like 1   | 121.525421 | 352.198242 | 883.371338 |
| 19183           | Psmc3ip         | proteasome (prosome, m     | 50         | 198.159515 | 881.389587 |
| 15499           | Hsf1            | heat shock factor 1        | 204.282349 | 430.048737 | 881.087219 |
| 19038           | Ppic            | peptidylprolyl isomerase   | 50         | 214.72728  | 879.353577 |

|           |               |                            |            |            |            |
|-----------|---------------|----------------------------|------------|------------|------------|
| 69178     | Snx5          | sorting nexin 5            | 196.068268 | 403.142212 | 878.336426 |
| 76448     | Ppp1r18       | protein phosphatase 1, re  | 92.8039093 | 368.720734 | 874.139465 |
| 16600     | Klf4          | Kruppel-like factor 4 (gu  | 50         | 166.581604 | 868.611572 |
| 54219     | Cd320         | CD320 antigen              | 79.3746643 | 224.96843  | 866.421021 |
| 68099     | Fam92a        | family with sequence sin   | 54.5486908 | 169.954285 | 861.594727 |
| 21825     | Thbs1         | thrombospondin 1           | 50         | 328.235748 | 855.04303  |
| 15275     | Hk1           | hexokinase 1               | 66.8420715 | 227.380524 | 846.795471 |
| 232023    | Vopp1         | vesicular, overexpressed   | 57.0042    | 176.709564 | 844.521179 |
| 14660     | Gls           | glutaminase                | 50         | 336.513245 | 842.097351 |
| 214230    | Pak6          | p21 protein (Cdc42/Rac)    | 50         | 199.415787 | 837.760742 |
| 104015    | Synj1         | synaptojanin 1             | 126.845154 | 277.785522 | 836.569397 |
| 72309     | Tmem158       | transmembrane protein 1    | 173.423752 | 372.457001 | 833.231934 |
| 94192     | C1galt1       | core 1 synthase, glycopr   | 134.162567 | 302.332275 | 820.890991 |
| 232286    | Tmf1          | TATA element modulato      | 55.6243629 | 150.86409  | 820.176147 |
| 109019    | Obfc2a        | oligonucleotide/oligosac   | 68.0824966 | 185.661896 | 817.79834  |
| 319520    | Dusp4         | dual specificity phosphat  | 50         | 338.827759 | 816.769653 |
| 67285     | Cwc27         | CWC27 spliceosome-ass      | 145.285217 | 315.692871 | 810.300049 |
| 19094     | Mapk11        | mitogen-activated protein  | 55.6243629 | 126.58046  | 809.537598 |
| 108067    | Eif2b3        | eukaryotic translation ini | 180.532043 | 364.786377 | 809.498169 |
| 70799     | Cep192        | centrosomal protein 192    | 82.9311829 | 263.554871 | 805.950317 |
| 72515     | Wdr43         | WD repeat domain 43        | 91.9072571 | 218.706879 | 803.771362 |
| 52055     | Rab11fip5     | RAB11 family interactin    | 50         | 243.120667 | 801.416504 |
| 12530     | Cdc25a        | cell division cycle 25 ho  | 84.2761688 | 175.144897 | 800.614624 |
| 68554     | 1110001A16Rik | RIKEN cDNA 1110001A16      | 154.744476 | 342.962952 | 793.737549 |
| 104732    | 4930427A07Rik | RIKEN cDNA 4930427A07      | 50         | 105.010254 | 791.011353 |
| 108909    | Aida          | axin interactor, dorsaliza | 87.6235809 | 322.395813 | 790.853638 |
| 72572     | Spats2        | spermatogenesis associat   | 57.487381  | 137.847275 | 790.704041 |
| 80294     | Pofut2        | protein O-fucosyltransfer  | 89.2822418 | 235.261902 | 786.564697 |
| 100217453 | Snord16a      | small nucleolar RNA, C/    | 50         | 109.915085 | 784.651917 |
| 67966     | Zcchc10       | zinc finger, CCHC doma     | 70.5380096 | 144.040909 | 782.9823   |
| 545085    | Wdr70         | WD repeat domain 70        | 50         | 149.07872  | 780.570007 |
| 66111     | Tmed3         | transmembrane emp24 d      | 169.897324 | 382.81842  | 779.533081 |
| 69241     | Polr2d        | polymerase (RNA) II (D     | 67.7038727 | 182.685333 | 776.246582 |
| 11783     | Apaf1         | apoptotic peptidase activ  | 121.629974 | 317.776733 | 773.264038 |
| 76464     | Casc5         | cancer susceptibility can  | 50         | 116.098816 | 771.781799 |
| 50918     | Myadm         | myeloid-associated diffe   | 56.7950859 | 134.517029 | 770.863159 |
| 99526     | Usp53         | ubiquitin specific peptid  | 99.3244629 | 274.214752 | 768.758179 |
| 73739     | Cby1          | chibby homolog 1 (Dros     | 55.1063309 | 146.378021 | 762.492371 |
| 73668     | Ttc21b        | tetratricopeptide repeat d | 90.9060364 | 221.670715 | 754.497864 |
| 12449     | Ccnf          | cyclin F                   | 50         | 186.168365 | 750.051208 |
| 213109    | Phf3          | PHD finger protein 3       | 160.886414 | 331.322662 | 748.319214 |
| 225651    | Mppe1         | metallophosphoesterase     | 167.367371 | 342.300873 | 739.238464 |
| 240055    | Neur1b        | neuralized homolog 1b (C   | 50         | 214.08783  | 738.738892 |
| 102626    | Mapkapk3      | mitogen-activated protein  | 50         | 118.887222 | 737.430908 |
| 240263    | Fem1c         | fem-1 homolog c (C.eleg    | 54.3490829 | 111.723091 | 733.565918 |
| 107029    | Me2           | malic enzyme 2, NAD(+)     | 50         | 142.077271 | 732.489563 |
| 23917     | Impdh1        | inosine 5'-phosphate deh   | 76.7543945 | 206.086182 | 730.072266 |
| 27373     | Csnk1e        | casein kinase 1, epsilon   | 70.7772217 | 244.266586 | 729.955627 |
| 15463     | Arfg1         | ArfGAP with FG repeats     | 79.2352524 | 283.936707 | 729.852112 |
| 69860     | Eif1ad        | eukaryotic translation ini | 51.2804947 | 147.777191 | 729.176758 |
| 18141     | Nup50         | nucleoporin 50             | 105.441055 | 230.545242 | 724.927246 |
| 75788     | Smurf1        | SMAD specific E3 ubiq      | 93.1825333 | 213.802063 | 724.723511 |
| 16001     | Igf1r         | insulin-like growth facto  | 97.9145355 | 256.215302 | 720.439453 |
| 14766     | Gpr56         | G protein-coupled recept   | 50         | 254.760971 | 718.833984 |
| 64602     | Ireb2         | iron responsive element    | 104.95787  | 229.928421 | 718.061646 |
| 259300    | Ehd2          | EH-domain containing 2     | 50         | 137.879807 | 716.050293 |
| 72061     | 2010111I01Rik | RIKEN cDNA 2010111I01      | 50         | 136.688614 | 710.109863 |
| 226551    | AI848100      | expressed sequence AI84    | 140.622925 | 340.60321  | 707.365601 |
| 69698     | 2310046K01Rik | RIKEN cDNA 2310046K01      | 50         | 129.501846 | 703.720825 |
| 26921     | Map4k4        | mitogen-activated protein  | 95.2546692 | 274.029419 | 694.983521 |
| 75472     | 1700009P17Rik | RIKEN cDNA 1700009P17      | 50         | 136.91922  | 692.594238 |



|              |                 |                            |            |            |            |
|--------------|-----------------|----------------------------|------------|------------|------------|
| 319622       | Itpripl2        | inositol 1,4,5-triphosphat | 68.5656738 | 153.431808 | 691.547485 |
| 56212        | Rhog            | ras homolog gene family    | 89.1776733 | 270.676544 | 690.099731 |
| 100515       | Zfp518b         | zinc finger protein 518B   | 104.574493 | 212.412811 | 689.623169 |
| 67268        | Myl12a          | myosin, light chain 12A,   | 50         | 202.249466 | 685.78125  |
| 76411        | 1700019E19Rik   | RIKEN cDNA 1700019E19      | 94.0791855 | 244.133606 | 685.641541 |
| 109082       | Fbxw17          | F-box and WD-40 domain     | 69.8805618 | 236.255035 | 683.403442 |
| 18516        | Pbx3            | pre B cell leukemia hom    | 50         | 142.23291  | 683.37384  |
| 233806       | Tmem159         | transmembrane protein 1    | 67.3252487 | 202.635681 | 678.253418 |
| 19164        | Psen1           | presenilin 1               | 139.308044 | 296.381958 | 676.079346 |
| 66822        | Fbxo25          | F-box protein 25           | 117.729675 | 241.533356 | 675.694824 |
| 320183       | Msrb3           | methionine sulfoxide red   | 116.937576 | 263.986328 | 666.499146 |
| 237500       | Tmtc3           | transmembrane and tetra    | 90.8014832 | 211.487579 | 658.779053 |
| 17685        | Msh2            | mutS homolog 2 (E. coli    | 88.211319  | 252.180527 | 649.810059 |
| 102774       | Bbs4            | Bardet-Biedl syndrome 4    | 93.2522354 | 296.161255 | 646.972107 |
| 103268       | Cep5711         | centrosomal protein 57-1   | 80.1018066 | 170.902161 | 646.676331 |
| 839241664862 | Gpr137blGpr137b | G protein-coupled recept   | 50         | 156.892212 | 639.187927 |
| 19893        | Rpgr            | retinitis pigmentosa GTP   | 80.8242035 | 170.538574 | 635.176758 |
| 14537        | Gcnt1           | glucosaminyl (N-acetyl)    | 86.1740417 | 261.285645 | 635.130676 |
| 270669       | Mbtps2          | membrane-bound transcr     | 93.9445343 | 269.696136 | 635.066589 |
| 22379        | Fmnl3           | formin-like 3              | 92.7041016 | 301.153809 | 630.910767 |
| 23999        | Twf2            | twinfilin, actin-binding p | 50         | 197.201752 | 630.427612 |
| 69399        | 1700025G04Rik   | RIKEN cDNA 1700025G04      | 50         | 133.757324 | 629.78186  |
| 231123       | Haus3           | HAUS augmin-like comp      | 71.2603989 | 171.002594 | 623.843018 |
| 21824        | Thbd            | thrombomodulin             | 50         | 266.729492 | 620.441528 |
| 68283        | 9530077C05Rik   | RIKEN cDNA 9530077C05      | 50         | 136.214691 | 620.121033 |
| 226122       | Ubt1            | ubiquitin domain contain   | 93.5263062 | 188.625732 | 614.778809 |
| 66208        | Nenf            | neuron derived neurotro    | 64.5956726 | 299.137817 | 612.865967 |
| 68732        | Lrrc16a         | leucine rich repeat contai | 50         | 121.730804 | 611.459351 |
| 665563       | Mthfd2l         | methylenetetrahydrofolat   | 50         | 105.70488  | 611.441284 |
| 16763        | Lad1            | ladinin                    | 50         | 128.531357 | 607.977295 |
| 75458        | Cklf            | chemokine-like factor      | 72.7796478 | 149.572449 | 602.884766 |
| 218699       | Pxk             | PX domain containing se    | 64.0919037 | 255.234894 | 602.768127 |
| 70240        | Ufsp1           | UFM1-specific peptidase    | 50         | 117.874283 | 600.786377 |
| 22393        | Wfs1            | Wolfram syndrome 1 hom     | 87.628334  | 221.946594 | 598.037109 |
| 20617        | Snc             | synuclein, alpha           | 50         | 123.087524 | 596.467773 |
| 239027       | Arhgap22        | Rho GTPase activating p    | 50         | 230.454712 | 592.607788 |
| 237436       | Gas2l3          | growth arrest-specific 2 l | 50         | 273.653107 | 591.799316 |
| 27886        | Dgcr14          | DiGeorge syndrome criti    | 86.7966309 | 190.995392 | 585.469421 |
| 16579        | Kifap3          | kinesin-associated protei  | 121.634727 | 248.103302 | 584.09729  |
| 171212       | Galnt10         | UDP-N-acetyl-alpha-D-g     | 90.6620712 | 236.595993 | 583.561584 |
| 14911        | Thumpd3         | THUMP domain contain       | 133.923355 | 288.124268 | 581.394104 |
| 432572       | Specc1          | sperm antigen with calpc   | 50         | 129.965881 | 578.464111 |
| 72512        | Tmem173         | transmembrane protein 1    | 57.2133141 | 200.376373 | 576.842224 |
| 233280       | Nipa1           | non imprinted in Prader-   | 133.335617 | 269.287292 | 562.268066 |
| 69101        | Ydj             | YdjC homolog (bacterial    | 50         | 226.608093 | 559.855713 |
| 24100        | Tpra1           | transmembrane protein, a   | 95.1849518 | 243.704956 | 559.170532 |
| 211329       | Ncoa7           | nuclear receptor coactiva  | 50         | 163.043396 | 555.542114 |
| 11833        | Aqp8            | aquaporin 8                | 50         | 111.336876 | 554.414917 |
| 55991        | Panx1           | pannexin 1                 | 50         | 169.360107 | 553.700073 |
| 193385       | Fam65b          | family with sequence sim   | 50         | 100.491653 | 550.433228 |
| 18011        | Neurl1a         | neuralized homolog 1A (    | 50         | 115.933296 | 544.509277 |
| 67695        | Ost4            | oligosaccharyltransferase  | 109.78968  | 264.164612 | 544.229858 |
| 69568        | Vkorc1l1        | vitamin K epoxide reduc    | 74.0945282 | 170.869629 | 543.911133 |
| 380711       | Rap1gap2        | RAP1 GTPase activating     | 50         | 186.720123 | 533.749146 |
| 68294        | Mfsd10          | major facilitator superfar | 50         | 199.925079 | 532.929138 |
| 73379        | Dcbld2          | discoidin, CUB and LCC     | 50         | 109.684486 | 531.348267 |
| 237253       | Lrp11           | low density lipoprotein r  | 50         | 241.854492 | 527.971375 |
| 106707       | Rpusd1          | RNA pseudouridylate sy     | 50         | 151.568634 | 526.075073 |
| 67296        | Socs4           | suppressor of cytokine si  | 118.905159 | 247.694458 | 522.093384 |
| 68481        | Mpz1l           | myelin protein zero-like   | 55.1015778 | 203.573639 | 520.036011 |
| 14013        | Mecom           | MDS1 and EVI1 comple       | 87.9372559 | 213.315399 | 518.849609 |

|                 |                   |                                      |            |            |            |
|-----------------|-------------------|--------------------------------------|------------|------------|------------|
| 104884          | Tdp1              | tyrosyl-DNA phosphodi                | 88.4251862 | 249.612823 | 518.180786 |
| 19877           | Rock1             | Rho-associated coiled-co             | 79.0958405 | 162.647278 | 512.135193 |
| 68259           | Ift80             | intraflagellar transport 80          | 71.0861359 | 164.21196  | 512.036621 |
| 224008          | 2310008H04Rik     | RIKEN cDNA 2310008H                  | 72.296463  | 192.173859 | 512.01355  |
| 18011           | Neurl1a           | neutralized homolog 1A (50           | 50         | 107.909012 | 511.136078 |
| 66854           | Trim35            | tripartite motif-containin           | 80.2412186 | 241.348022 | 504.061768 |
| 67980           | Gnpda2            | glucosamine-6-phosphate              | 74.8866272 | 197.146576 | 503.363403 |
| 434215          | Lrrc32            | leucine rich repeat contain          | 50         | 174.066879 | 501.049683 |
| 56016           | Hebp2             | heme binding protein 2 (50           | 50         | 110.664886 | 500.224762 |
| 22321           | Vars              | valyl-tRNA synthetase (73.262825     | 73.262825  | 215.191315 | 498.561768 |
| 50492           | Thop1             | thimet oligopeptidase 1 (65.9105606  | 65.9105606 | 164.818878 | 495.59729  |
| 69428           | 1700016C15Rik     | RIKEN cDNA 1700016C                  | 65.5271912 | 157.75235  | 495.480621 |
| 13025           | Ctla2b            | cytotoxic T lymphocyte-4             | 53.5126266 | 107.545425 | 493.654968 |
| 217325          | Llgl2             | lethal giant larvae homolog          | 61.3179703 | 134.328873 | 487.987305 |
| 229906          | Gtf2b             | general transcription factor         | 50         | 150.510406 | 482.122498 |
| 67115           | Rpl14             | ribosomal protein L14 (50            | 50         | 110.389015 | 481.895691 |
| 195208          | Dcdc2a            | doublecortin domain contain          | 72.84935   | 153.762848 | 476.890289 |
| 67973           | Mphosph10         | M-phase phosphoprotein (91.319519    | 91.319519  | 201.996231 | 474.448395 |
| 106582          | Nrm               | nurim (nuclear envelope) (76.7940063 | 76.7940063 | 180.646729 | 473.809143 |
| 71820           | Wdr34             | WD repeat domain 34 (66.7026596      | 66.7026596 | 135.409714 | 473.541321 |
| 217370          | BC017643          | cDNA sequence BC017643               | 50         | 135.013596 | 470.954803 |
| 319996          | Casc4             | cancer susceptibility candidate      | 67.1858368 | 203.109619 | 470.803619 |
| 330817          | Dhps              | deoxyhypusine synthase (103.408531   | 103.408531 | 232.044846 | 469.472595 |
| 11352           | Abl2              | v-abl Abelson murine leukemia        | 87.3495178 | 216.876236 | 462.927429 |
| 380752          | Tssc1             | tumor suppressing substrate          | 90.3182983 | 195.020264 | 462.270142 |
| 74895           | 4930455F23Rik     | RIKEN cDNA 4930455F                  | 94.2185974 | 199.76947  | 458.927704 |
| 21853           | Timeless          | timeless homolog (Drosophila)        | 50         | 135.211655 | 457.021515 |
| 382985          | Rrm2b             | ribonucleotide reductase (81.3770905 | 81.3770905 | 208.423309 | 454.213165 |
| 14381           | G6pdx             | glucose-6-phosphate dehydrogen       | 50         | 193.773895 | 454.020905 |
| 235283          | Gramd1b           | GRAM domain containing 1b            | 50         | 195.757324 | 453.0448   |
| 74360           | Cep57             | centrosomal protein 57 (50           | 50         | 114.12529  | 452.352966 |
| 68146           | Arl13b            | ADP-ribosylation factor 13b          | 50         | 162.98822  | 445.82428  |
| 66089           | Rmnd5b            | required for meiotic nuclear         | 93.2173843 | 190.664337 | 445.574493 |
| 80287           | Apobec3           | apolipoprotein B mRNA editing        | 71.3301086 | 146.608612 | 445.365784 |
| 17250           | Abcc1             | ATP-binding cassette, subfamily      | 50         | 126.570557 | 444.830078 |
| 60364           | Donson            | downstream neighbor of p38           | 75.0957413 | 201.379425 | 443.185181 |
| 20514           | Slc1a5            | solute carrier family 1 (neutral)    | 65.1881638 | 163.57251  | 441.2034   |
| 18286           | Odf2              | outer dense fiber of sperm           | 62.1496773 | 145.683395 | 439.075378 |
| 382252          | A830080D01Rik     | RIKEN cDNA A830080D                  | 54.6881027 | 112.229568 | 433.959839 |
| 67629           | Spc24             | SPC24, NDC80 kinetochore             | 50         | 142.034836 | 429.634766 |
| 224022          | Slc7a4            | solute carrier family 7 (cationic)   | 50         | 132.796722 | 428.658661 |
| 57265           | Fzd2              | frizzled homolog 2 (Drosophila)      | 56.2073479 | 133.448914 | 423.199707 |
| 225849          | Ppp2r5b           | protein phosphatase 2, regulatory    | 76.6450882 | 190.180511 | 422.723175 |
| 22240           | Dpysl3            | dihydropyrimidinase-like 3           | 50         | 188.680908 | 417.729279 |
| 58193           | Extl2             | exostoses (multiple)-like 2          | 80.8242035 | 180.348236 | 414.143646 |
| 191578          | Helq              | helicase, POLQ-like (50              | 50         | 143.544342 | 413.323669 |
| 11785           | Apbb1             | amyloid beta (A4) precursor          | 50         | 111.667923 | 412.950623 |
| 15064           | Mr1               | major histocompatibility complex     | 50         | 150.344894 | 408.364258 |
| 67326           | 1700037H04Rik     | RIKEN cDNA 1700037H                  | 50         | 158.161209 | 406.039062 |
| 226352          | Epb4.115          | erythrocyte protein band 4.115       | 50         | 174.638428 | 396.0578   |
| 16196           | Il7               | interleukin 7 (50                    | 50         | 137.415787 | 395.150726 |
| 16210           | Impact            | imprinted and ancient protein        | 52.7949867 | 120.584885 | 395.075134 |
| 17161           | Maoa              | monoamine oxidase A (50              | 50         | 106.51976  | 392.947113 |
| 18861           | Pms2              | postmeiotic segregation increase     | 50         | 156.363098 | 389.128143 |
| 737381100048005 | Haus7LOC100048005 | HAUS augmin-like complex             | 58.5281982 | 128.917572 | 386.710876 |
| 98415           | Nucks1            | nuclear casein kinase and            | 51.9632835 | 136.74379  | 380.321838 |
| 252903          | Ap1s3             | adaptor-related protein complex      | 50         | 160.926971 | 375.65332  |
| 56321           | Aatf              | apoptosis antagonizing transcription | 69.9803696 | 161.676788 | 375.525146 |
| 68964           | 1500010J02Rik     | RIKEN cDNA 1500010J                  | 72.644989  | 156.077332 | 374.752808 |
| 27392           | Pign              | phosphatidylinositol glycan          | 59.524662  | 180.182709 | 370.125366 |
| 77579           | Myh10             | myosin, heavy polypeptide            | 50         | 182.519806 | 370.038269 |

|                 |                 |                            |                           |            |            |    |
|-----------------|-----------------|----------------------------|---------------------------|------------|------------|----|
| 75568           | Capsl           | calcyphosine-like          | 50                        | 142.927521 | 369.206787 |    |
| 73914           | Irak3           | interleukin-1 receptor-ass | 50                        | 133.426285 | 368.579041 |    |
| 78255           | Ralgps2         | Ral GEF with PH domain     | 50                        | 117.014137 | 367.451752 |    |
| 60363           | Cldn15          | claudin 15                 | 61.0740051                | 179.98465  | 367.381104 |    |
| 75570           | Nhej1           | nonhomologous end-join     | 64.8744965                | 170.869629 | 365.852844 |    |
| 78394           | Ddx52           | DEAD (Asp-Glu-Ala-As       | 66.9418793                | 142.982697 | 364.5448   |    |
| 207175          | Cetn4           | centrin 4                  | 50                        | 108.074539 | 364.184937 |    |
| 239393          | Lrp12           | low density lipoprotein-r  | 62.7326622                | 143.820221 | 362.102905 |    |
| 212123          | Dcaf15          | DDB1 and CUL4 associ       | 63.3203964                | 152.451401 | 360.900024 |    |
| 216892          | Spns2           | spinstar homolog 2 (Dros   | 50                        | 106.961151 | 360.783356 |    |
| 216618          | Ccdc104         | coiled-coil domain conta   | 64.3168564                | 135.322006 | 356.801697 |    |
| 76453           | Prss23          | protease, serine, 23       | 50                        | 101.108467 | 354.458405 |    |
| 327900          | Ubt2            | ubiquitin domain contain   | 67.3252487                | 149.299408 | 352.930176 |    |
| 66871           | Cpne8           | copine VIII                | 62.9370232                | 153.597321 | 352.412537 |    |
| 69159           | Rheb1l          | Ras homolog enriched in    | 50                        | 108.184883 | 352.336945 |    |
| 170835          | Inpp5j          | inositol polyphosphate 5-  | 50                        | 101.890808 | 348.628082 |    |
| 171531          | Mlph            | melanophilin               | 59.071579                 | 127.550964 | 344.861725 |    |
| 16196           | Il7             | interleukin 7              | 50                        | 121.643097 | 343.936554 |    |
| 18844           | Plxna1          | plexin A1                  | 50                        | 115.040604 | 339.448792 |    |
| 227399          | Ppip5k2         | diphosphoinositol pentak   | 50                        | 152.097717 | 337.100525 |    |
| 16440           | Itpr3           | inositol 1,4,5-triphosphat | 50                        | 108.967224 | 336.385742 |    |
| 210148          | Slc30a6         | solute carrier family 30 ( | 60.3167572                | 156.60643  | 330.159363 |    |
| 20723           | Serpib9         | serine (or cysteine) pepti | 50                        | 151.536087 | 326.40448  |    |
| 66196           | Myo19           | myosin XIX                 | 59.5199051                | 160.011658 | 321.689941 |    |
| 16563           | Kif2a           | kinesin family member 2    | 60.4213142                | 138.970566 | 321.643921 |    |
| 217578 10004855 | Baz1a LOC100048 | bromodomain adjacent to    | 58.3586922                | 155.879272 | 320.585693 |    |
| 72462           | Rrp1b           | ribosomal RNA processi     | 56.695282                 | 133.712067 | 320.184723 |    |
| 66595           | Aste1           | asteroid homolog 1 (Dros   | 50                        | 100.248322 | 320.143646 |    |
| 77300           | Raph1           | Ras association (RalGDS    | 57.487381                 | 142.343246 | 316.49884  |    |
| 59053           | Fam203a         | family with sequence sim   | 50                        | 129.612198 | 309.644775 |    |
| 11641           | Akap2           | A kinase (PRKA) anchor     | 50                        | 131.751251 | 308.570068 |    |
| 74166           | Tmem38a         | transmembrane protein 3    | 51.3058395                | 147.85498  | 305.0354   |    |
| 109929          | Zbtb25          | zinc finger and BTB dom    | 50                        | 128.797318 | 297.152649 |    |
| 244329          | Mcph1           | microcephaly, primary a    | 52.4021072                | 112.758667 | 294.483948 |    |
| 217578          | Baz1a           | bromodomain adjacent to    | 50                        | 101.835632 | 293.908813 |    |
| 71566           | 9030425E11Rik   | RIKEN cDNA 9030425E11      | 50                        | 131.673447 | 291.519501 |    |
| 103841          | Cuedc1          | CUE domain containing      | 54.7578049                | 112.13195  | 291.507996 |    |
| 56312           | Nupr1           | nuclear protein 1          | 50                        | 130.108765 | 288.770325 |    |
| 380753          | Atxn7l1         | ataxin 7-like 1            | 50                        | 107.909012 | 287.572388 |    |
| 67157           | 2610301B20Rik   | RIKEN cDNA 2610301B20      | 50                        | 100.556725 | 287.182922 |    |
| 216835          | Usp43           | ubiquitin specific peptid  | 50                        | 122.944633 | 286.479614 |    |
| 57258           | Xpo4            | exportin 4                 | 50                        | 128.488922 | 285.897888 |    |
| 21808           | Tgfb2           | transforming growth fact   | 50                        | 127.849457 | 282.555481 |    |
| 75316           | Taf1d           | TATA box binding prote     | 50                        | 107.214386 | 279.201538 |    |
| 53618           | Fut8            | fucosyltransferase 8       | 50.3093796                | 106.123642 | 278.282959 |    |
| 18452           | P4ha2           | procollagen-proline, 2-ox  | 59.4597092                | 133.283401 | 277.939514 |    |
| 212391          | Lcor            | ligand dependent nuclear   | 50                        | 109.165283 | 277.103088 |    |
| 54384           | Mtmr7           | myotubularin related pro   | 50                        | 133.900208 | 270.929321 |    |
| 73047           | Camk2n2         | calcium/calmodulin-depe    | 50                        | 132.841995 | 266.093201 |    |
| 224523          | 4732491K20Rik   | RIKEN cDNA 4732491K20      | 50                        | 127.297729 | 264.267517 |    |
| 72355           | 2210021J22Rik   | RIKEN cDNA 2210021J22      | 50                        | 100.887772 | 263.348938 |    |
| 74133           | 1200011M11Rik   | RIKEN cDNA 1200011M11      | 50                        | 103.91951  | 258.774048 |    |
| 72149           | Strada          | STE20-related kinase ad    | 50                        | 106.01329  | 243.171204 |    |
| 268396          | Sh3pxd2b        | SH3 and PX domains 2B      | 50                        | 100.998116 | 241.061249 |    |
| 19326           | Rab11b          | RAB11B, member RAS         | 50                        | 110.025436 | 227.533829 |    |
| 12830           | Col4a5          | collagen, type IV, alpha   | 50                        | 103.169708 | 227.38266  |    |
| 13488           | Drd1a           | dopamine receptor D1A      | 50                        | 100.722244 | 203.246292 |    |
| Pattern I -Down | 216454          | BC089597                   | cDNA sequence BC0895      | 18599.9023 | 1750.01294 | 50 |
|                 | 21936           | Tnfrsf18                   | tumor necrosis factor rec | 346.733459 | 104.39344  | 50 |
|                 | 75104           | Mmd2                       | monocyte to macrophage    | 889.570007 | 110.3013   | 50 |
|                 | 54150           | Rdh7                       | retinol dehydrogenase 7   | 12174.1455 | 5574.52002 | 50 |

|                  |                   |                            |            |            |            |
|------------------|-------------------|----------------------------|------------|------------|------------|
| 53412            | Ppp1r3c           | protein phosphatase 1, re  | 2828.66016 | 686.556885 | 50         |
| 94179            | Krt23             | keratin 23                 | 379.394836 | 120.948471 | 50         |
| 71773            | Ugt2b1            | UDP glucuronosyltransf     | 8916.39648 | 2163.38086 | 50         |
| 13124            | Cyp8b1            | cytochrome P450, family    | 11715.2129 | 5670.45801 | 50         |
| 20211            | Saa4              | serum amyloid A 4          | 5370.1084  | 2197.74707 | 50         |
| 71911            | Bdh1              | 3-hydroxybutyrate dehyd    | 3162.01367 | 1541.63782 | 50         |
| 16325            | Inhbc             | inhibin beta-C             | 1349.71924 | 412.094574 | 50         |
| 23945            | Mgll              | monoglyceride lipase       | 11059.4941 | 5360.46484 | 50         |
| 207742           | Rnf43             | ring finger protein 43     | 300.085144 | 137.603943 | 50         |
| 12355            | Nr1i3             | nuclear receptor subfami   | 2003.02368 | 820.783875 | 50         |
| 15450            | Lipc              | lipase, hepatic            | 994.119141 | 455.95224  | 50         |
| 11835            | Ar                | androgen receptor          | 436.921844 | 113.508469 | 50         |
| 75178            | 4930528F23Rik     | RIKEN cDNA 4930528F23      | 601.977844 | 127.924438 | 50         |
| 17167            | Marco             | macrophage receptor wit    | 693.113586 | 228.682068 | 50         |
| 20520            | Slc22a5           | solute carrier family 22 ( | 315.451874 | 121.984039 | 50         |
| 171281           | Acot3             | acyl-CoA thioesterase 3    | 5349.12256 | 343.170929 | 50         |
| 384198           | Fam47e            | family with sequence sim   | 1168.22095 | 150.588226 | 50         |
| 64385            | Cyp4f14           | cytochrome P450, family    | 3376.84326 | 939.09668  | 50         |
| 272428           | Acsm5             | acyl-CoA synthetase mec    | 3076.46826 | 1213.6001  | 50         |
| 68444            | Cyp2d13           | cytochrome P450, family    | 943.217285 | 200.91539  | 50         |
| 100038948        | Mup9              | major urinary protein 9    | 1597.84595 | 107.710953 | 50         |
| 23957            | Nr0b2             | nuclear receptor subfami   | 395.967163 | 113.144882 | 50         |
| 56636100862558   | Fgf21LOC100862558 | fibroblast growth factor 2 | 1517.55408 | 368.65564  | 50         |
| 13482            | Dpp4              | dipeptidylpeptidase 4      | 403.289307 | 195.205597 | 50         |
| 320571           | Atp8b5            | ATPase, class I, type 8B   | 302.54541  | 132.653839 | 50         |
| 20532            | Slc3a1            | solute carrier family 3, n | 1075.50098 | 244.92868  | 50         |
| 217082           | Hlf               | hepatic leukemia factor    | 932.139038 | 401.314423 | 50         |
| 116852           | Akr1c20           | aldo-keto reductase fami   | 415.712585 | 189.927277 | 50         |
| 14451            | Gas1              | growth arrest specific 1   | 230.901627 | 114.115379 | 50         |
| 13095            | Cyp2c29           | cytochrome P450, family    | 18297.0352 | 6966.94043 | 50         |
| 64697            | Keg1              | kidney expressed gene 1    | 499.201416 | 247.992966 | 50         |
| 18559            | Pctp              | phosphatidylcholine tran   | 1848.89062 | 794.250854 | 50         |
| 226781           | Slc30a10          | solute carrier family 30,  | 469.464417 | 107.522797 | 50         |
| 83702            | Akr1c6            | aldo-keto reductase fami   | 654.519348 | 135.354553 | 50         |
| 13897            | Ces1e             | carboxylesterase 1E        | 1811.78247 | 595.07843  | 50         |
| 66438            | Hamp2             | hepcidin antimicrobial pe  | 3872.55176 | 189.794296 | 50         |
| 54357            | Epb4.114b         | erythrocyte protein band   | 1146.2688  | 484.082489 | 50         |
| 109254           | 9530008L14Rik     | RIKEN cDNA 9530008L14      | 2816.74072 | 1112.53406 | 50         |
| 171282           | Acot4             | acyl-CoA thioesterase 4    | 872.484375 | 173.437332 | 50         |
| 12350            | Car3              | carbonic anhydrase 3       | 6733.21875 | 1547.89648 | 50         |
| 19266            | Ptprd             | protein tyrosine phosphat  | 695.957214 | 323.087585 | 50         |
| 234564           | Ces1f             | carboxylesterase 1F        | 1952.41016 | 367.010345 | 50         |
| 13094            | Cyp2b9            | cytochrome P450, family    | 2839.35352 | 258.045959 | 50         |
| 13089            | Cyp2b13           | cytochrome P450, family    | 2866.3562  | 208.98494  | 50         |
| 13109            | Cyp2j5            | cytochrome P450, family    | 3842.21582 | 536.659058 | 50         |
| 75552            | Paqr9             | progesterin and adipoQ rec | 343.420868 | 115.547073 | 50         |
| 337924539731100  | Cyp3a44/Cyp3a41   | cytochrome P450, family    | 17973.1445 | 2851.57861 | 50         |
| 1071411404195113 | Cyp2c50/Cyp2c54   | cytochrome P450, family    | 16145.7305 | 2608.37891 | 50         |
| 72948            | Tppp              | tubulin polymerization p   | 384.187073 | 191.579666 | 50.6094513 |
| 57742            | Abhd1             | abhydrolase domain cont    | 2649.22266 | 878.618958 | 53.3882217 |
| 69638            | Enho              | energy homeostasis asso    | 1208.32007 | 396.364319 | 53.539402  |
| 75698            | Fam35a            | family with sequence sin   | 422.77652  | 183.445038 | 54.7718582 |
| 215929           | AI317395          | expressed sequence AI31    | 883.399536 | 378.585571 | 60.7418594 |
| 18628            | Per3              | period homolog 3 (Dros     | 541.656372 | 244.828232 | 64.6249084 |
| 67307            | Pbld2             | phenazine biosynthesis-l   | 10919.0947 | 5423.56396 | 73.9669037 |
| 66116            | Cml1              | camello-like 1             | 1219.1814  | 576.088623 | 79.5359497 |
| 15439            | Hp                | haptoglobin                | 20623.6348 | 7430.90039 | 87.1919403 |
| 100216530        | Snord118          | small nucleolar RNA, C/    | 2870.16943 | 378.455383 | 90.662529  |
| 68616            | Gdpd3             | glycerophosphodiester p    | 7153.09277 | 3260.56104 | 98.568306  |
| 192136           | 5033411D12Rik     | RIKEN cDNA 5033411D12      | 1141.25317 | 346.874664 | 103.747894 |
| 232370           | Clstn3            | calsyntenin 3              | 1265.73462 | 434.615479 | 109.113174 |

|                 |                |                             |            |            |            |
|-----------------|----------------|-----------------------------|------------|------------|------------|
| 15483           | Hsd11b1        | hydroxysteroid 11-beta d    | 49274.5078 | 16211.248  | 111.415398 |
| 16841           | Lect2          | leukocyte cell-derived ch   | 3501.32031 | 1611.0127  | 120.292343 |
| 75735           | Pank1          | pantothenate kinase 1       | 1435.99792 | 624.617737 | 153.502838 |
| 12401           | Serpina6       | serine (or cysteine) pepti  | 13168.4355 | 4677.94678 | 168.588074 |
| 14373           | G0s2           | G0/G1 switch gene 2         | 7635.54346 | 3459.38672 | 174.459473 |
| 100217422       | Snord13        | small nucleolar RNA, C/     | 1318.35864 | 564.611023 | 195.991257 |
| 69772           | Bdh2           | 3-hydroxybutyrate dehyd     | 1298.11401 | 528.291016 | 262.90686  |
| 13170           | Dbp            | D site albumin promoter     | 4214.5752  | 2055.66284 | 307.15686  |
| 67475           | Ero1lb         | ERO1-like beta (S. cerev    | 2370.48315 | 1182.3999  | 338.204834 |
| 19363           | Rad5111        | RAD51-like 1 (S. cerevis    | 6146.80273 | 924.372314 | 357.353882 |
| 20322           | Sord           | sorbitol dehydrogenase      | 11552.6602 | 3874.11816 | 562.780762 |
| 22361           | Vnn1           | vanin 1                     | 16013.2354 | 6664.88281 | 1327.27136 |
| 67442           | Retsat         | retinol saturase (all trans | 33140.9688 | 13459.6035 | 1890.65186 |
| 12468           | Cct7           | chaperonin containing Tc    | 22120.9316 | 26603.1016 | 65430.1641 |
| 23980           | Pebp1          | phosphatidylethanolamin     | 18629.1348 | 16641.0859 | 41907.8086 |
| 153871100504131 | HnmpkGm20077   | heterogeneous nuclear ri    | 13175.6221 | 16883.875  | 40963.3594 |
| 14873           | Gsto1          | glutathione S-transferase   | 12182.5176 | 11097.4551 | 36592.375  |
| 276770          | Eif5a          | eukaryotic translation ini  | 13489.2832 | 15265.4873 | 31305.8555 |
| 67332           | Snrpd3         | small nuclear ribonucleo    | 6598.4165  | 7614.50098 | 30101.7324 |
| 22608           | Ybx1           | Y box protein 1             | 8007.22461 | 6471.17773 | 28225.5742 |
| 12443           | Ccnd1          | cyclin D1                   | 3996.84155 | 3391.0376  | 27519.8984 |
| 71994           | Cnn3           | calponin 3, acidic          | 7428.07324 | 10756.7734 | 26488.2852 |
| 20610           | Sumo3          | SMT3 suppressor of mif      | 8176.70068 | 10975.0273 | 23373.2207 |
| 66271           | Tmem126a       | transmembrane protein 1     | 7341.04883 | 8264.38086 | 22297.5195 |
| 382010          | BC088983       | cDNA sequence BC0889        | 1285.35327 | 1179.61157 | 22196.2617 |
| 12466           | Cct6a          | chaperonin containing Tc    | 4182.33203 | 3883.92236 | 21924.4355 |
| 19166           | Psm2           | proteasome (prosome, m      | 5701.87402 | 7244.95801 | 20830.1445 |
| 276770          | Eif5a          | eukaryotic translation ini  | 3384.99878 | 3632.77466 | 20795.0195 |
| 15516           | Hsp90ab1       | heat shock protein 90 alp   | 5374.80225 | 6741.94824 | 18712.1562 |
| 19181           | Psmc2          | proteasome (prosome, m      | 6621.05176 | 8063.58301 | 18198.9336 |
| 15526           | Hspa9          | heat shock protein 9        | 7001.83398 | 6777.4292  | 17563.4336 |
| 276770          | Eif5a          | eukaryotic translation ini  | 2293.07129 | 2518.85132 | 16365.1865 |
| 17149           | Magoh          | mago-nashi homolog, pro     | 4202.8584  | 5278.90527 | 15518.4189 |
| 20867           | Stip1          | stress-induced phosphop     | 2027.77832 | 2278.90381 | 15122.7988 |
| 56350           | Arl3           | ADP-ribosylation factor-    | 1357.6261  | 1874.4657  | 14574.8359 |
| 68544           | 2310036O22Rik  | RIKEN cDNA 2310036O         | 3608.21533 | 5110.13037 | 14312.5029 |
| 14791           | Emg1           | EMG1 nucleolar protein      | 6120.88672 | 6792.13672 | 14301.0195 |
| 67089           | Psmc6          | proteasome (prosome, m      | 5540.29883 | 5484.31934 | 13878.416  |
| 54198           | Snx3           | sorting nexin 3             | 2198.53735 | 2811.09814 | 13570.4609 |
| 12464           | Cct4           | chaperonin containing Tc    | 4911.35303 | 6582.43164 | 13349.7012 |
| 22384           | Eif4h          | eukaryotic translation ini  | 5210.65869 | 6531.26123 | 13241.4619 |
| 107765          | Ankrd1         | ankyrin repeat domain 1     | 50         | 50         | 13167.7012 |
| 20973           | Syng2          | synaptogyrin 2              | 4124.64648 | 6144.07812 | 12632.1045 |
| 19045           | Ppp1ca         | protein phosphatase 1, ca   | 1945.30652 | 2572.08569 | 12187.7822 |
| 67068           | Dynlrb1        | dynein light chain roadbl   | 4247.64844 | 5204.32666 | 12114.0469 |
| 68041           | Mid1ip1        | Mid1 interacting protein    | 1535.63135 | 1723.24658 | 12092.3477 |
| 15901           | Id1            | inhibitor of DNA binding    | 1845.78406 | 2262.46338 | 11904.3936 |
| 100504986166882 | LOC1005049861B | uncharacterized LOC100      | 4248.42334 | 5341.37012 | 11707.8945 |
| 100041585111702 | Amd2lAmd1      | S-adenosylmethionine de     | 4038.729   | 5242.40527 | 11446.8105 |
| 12465           | Cct5           | chaperonin containing Tc    | 3155.99829 | 3756.53979 | 11416.1924 |
| 72787           | Tmem48         | transmembrane protein 4     | 385.527283 | 486.121094 | 11256.7891 |
| 211556          | Aplar          | adaptor-related protein c   | 1875.97412 | 2748.76709 | 11050.5918 |
| 26441           | Psm4           | proteasome (prosome, m      | 5135.77832 | 5323.04541 | 10869.667  |
| 12785           | Cnbp           | cellular nucleic acid bind  | 3690.21826 | 4833.28857 | 10833.7051 |
| 66647           | Ndnl2          | necdin-like 2               | 3408.4165  | 3470.94092 | 10794.834  |
| 171283          | Havcr1         | hepatitis A virus cellular  | 50         | 50         | 10719.5156 |
| 76959           | Chmp5          | charged multivesicular b    | 2882.07617 | 3190.71338 | 9963.78125 |
| 26987           | Eif4e2         | eukaryotic translation ini  | 2124.25586 | 2632.46582 | 9803.52637 |
| 12261           | C1qbp          | complement component        | 1061.28918 | 1387.14771 | 9708.45996 |
| 56332           | Amotl2         | angiomin-like 2             | 371.245728 | 391.900879 | 9651.38281 |
| 12387           | Ctnnb1         | catenin (cadherin associa   | 2771.69092 | 3812.00952 | 9645.94629 |

Pattern II -Up

|        |               |                            |            |            |            |
|--------|---------------|----------------------------|------------|------------|------------|
| 66235  | Eif1ax        | eukaryotic translation ini | 1077.65393 | 1549.8418  | 9595.85938 |
| 59054  | Mrps30        | mitochondrial ribosomal    | 3410.21289 | 3945.1499  | 9363.15039 |
| 19170  | Psmbl         | proteasome (prosome, m     | 4340.03906 | 3790.41528 | 9017.45703 |
| 20643  | Snrpe         | small nuclear ribonucleo   | 1380.94543 | 2047.98364 | 8985.25293 |
| 225363 | Etf1          | eukaryotic translation ter | 1953.89136 | 2256.64893 | 8968.59863 |
| 66181  | Nop10         | NOP10 ribonucleoprotei     | 2204.15015 | 2776.12476 | 8900.60156 |
| 110750 | Cse11         | chromosome segregation     | 1342.80591 | 1783.60962 | 8887.26465 |
| 68095  | Ociad1        | OCIA domain containing     | 3117.73975 | 4281.75391 | 8872.15332 |
| 66256  | Ssr2          | signal sequence receptor   | 2845.47656 | 3975.69092 | 8855.36523 |
| 13200  | Ddost         | dolichyl-di-phosphoolig    | 3602.77856 | 4128.38867 | 8842.70898 |
| 12301  | Cacybp        | calcyclin binding protein  | 1963.64844 | 2127.99023 | 8622.75195 |
| 209318 | Gps1          | G protein pathway suppr    | 2973.06934 | 3746.01416 | 8479.18359 |
| 12343  | Capza2        | capping protein (actin fil | 1569.09424 | 2158.05713 | 8466.10352 |
| 66448  | Mrpl20        | mitochondrial ribosomal    | 2982.30664 | 3055.38867 | 8465.88672 |
| 14870  | Gstp1         | glutathione S-transferase  | 2667.90039 | 2870.19092 | 8398.41406 |
| 12462  | Cct3          | chaperonin containing Tc   | 1377.58862 | 1343.88855 | 8292.02734 |
| 19072  | Prep          | prolyl endopeptidase       | 912.51239  | 1107.68726 | 8229.77734 |
| 94066  | Mrpl36        | mitochondrial ribosomal    | 2456.34814 | 3322.05591 | 8078.10986 |
| 23874  | Farsb         | phenylalanyl-tRNA synt     | 2509.54883 | 2875.4126  | 7891.64795 |
| 20810  | Srm           | spermidine synthase        | 804.56665  | 933.604858 | 7861.46094 |
| 68212  | Tmbim4        | transmembrane BAX inh      | 2576.2356  | 3263.3916  | 7734.40332 |
| 407819 | BC031181      | cDNA sequence BC0311       | 3060.83228 | 3451.46021 | 7681.81543 |
| 74287  | Kcmf1         | potassium channel modu     | 2406.35889 | 3425.92725 | 7652.60156 |
| 26443  | Psm6          | proteasome (prosome, m     | 3182.66016 | 3081.6062  | 7647.95947 |
| 218335 | Clptm11       | CLPTM1-like                | 2835.33105 | 3084.89111 | 7623.14551 |
| 26446  | Psm3          | proteasome (prosome, m     | 2785.88354 | 2930.64014 | 7610.43848 |
| 56207  | Uchl5         | ubiquitin carboxyl-termin  | 1086.66321 | 1315.89697 | 7556.14941 |
| 66357  | Ostc          | oligosaccharyltransferase  | 2142.09229 | 2677.99707 | 7554.79102 |
| 23837  | Cfdp1         | craniofacial development   | 2924.4502  | 3728.7251  | 7540.76855 |
| 15460  | Hr            | hairless                   | 3207.15186 | 2744.0249  | 7533.09277 |
| 26445  | Psm2          | proteasome (prosome, m     | 2382.60229 | 2454.70093 | 7499.27783 |
| 20382  | Srsf2         | serine/arginine-rich splic | 1056.01062 | 1261.67224 | 7476.21973 |
| 68275  | Rpa1          | replication protein A1     | 1261.96265 | 1835.33032 | 7256.2168  |
| 98711  | Rdh10         | retinol dehydrogenase 10   | 548.425659 | 441.413177 | 7185.57568 |
| 52502  | Carhsp1       | calcium regulated heat st  | 2120.77075 | 2919.21631 | 7168.78613 |
| 67054  | Paics         | phosphoribosylaminoimi     | 2456.68115 | 2252.2959  | 7147.48926 |
| 110052 | Dek           | DEK oncogene (DNA bi       | 1283.85315 | 1913.50195 | 7135.75    |
| 12793  | Cnih          | cornichon homolog (Dro     | 2160.93652 | 2889.28662 | 7104.38184 |
| 20637  | Snmp70        | small nuclear ribonucleo   | 1557.57886 | 2196.20068 | 7031.97461 |
| 16911  | Lmo4          | LIM domain only 4          | 1506.56604 | 1881.24084 | 7000.53369 |
| 14621  | Gjb4          | gap junction protein, bet  | 50         | 50         | 6988.9043  |
| 24030  | Mrps12        | mitochondrial ribosomal    | 2066.14917 | 2499.57153 | 6939.71484 |
| 67804  | Snx2          | sorting nexin 2            | 1886.30151 | 2580.98145 | 6873.80469 |
| 15191  | Hdgf          | hepatoma-derived growth    | 1936.59656 | 2798.01465 | 6855.32275 |
| 12345  | Capzb         | capping protein (actin fil | 2122.44214 | 3108.91895 | 6836.71582 |
| 66143  | Eef1e1        | eukaryotic translation elc | 391.135345 | 499.070007 | 6652.18945 |
| 14852  | Gspt1         | G1 to S phase transition   | 1151.6438  | 1415.28223 | 6584.82422 |
| 22192  | Ube2m         | ubiquitin-conjugating en   | 704.570557 | 1051.27112 | 6564.25342 |
| 66276  | 1810009A15Rik | RIKEN cDNA 1810009A        | 758.759583 | 955.02217  | 6526.91992 |
| 230126 | Shb           | src homology 2 domain-c    | 3114.85034 | 3176.39233 | 6428.20898 |
| 107071 | Wdr74         | WD repeat domain 74        | 1165.54199 | 1441.71765 | 6372.16992 |
| 68202  | Ndufa5        | NADH dehydrogenase (u      | 3130.4895  | 3080.62598 | 6340.30371 |
| 26891  | Cops4         | COP9 (constitutive phot    | 1890.14478 | 2126.6123  | 6328.4834  |
| 12558  | Cdh2          | cadherin 2                 | 793.741821 | 866.336426 | 6256.91406 |
| 52615  | Suz12         | suppressor of zeste 12 ho  | 1740.27173 | 2322.65405 | 6228.87842 |
| 56047  | Msln          | mesothelin                 | 50         | 50         | 6204.8667  |
| 23897  | Hax1          | HCLS1 associated X-1       | 1253.82312 | 1425.96191 | 6142.81055 |
| 268656 | Sptlc1        | serine palmitoyltransfera  | 1394.61865 | 1116.16431 | 6080.32031 |
| 52502  | Carhsp1       | calcium regulated heat st  | 1753.00867 | 2399.65283 | 6025.22754 |
| 218121 | Mboat1        | membrane bound O-acyl      | 50         | 50         | 5967.36328 |
| 74493  | Tnks2         | tankyrase, TRF1-interact   | 1931.34338 | 2615.27686 | 5963.47217 |

|                |                   |                             |             |            |            |
|----------------|-------------------|-----------------------------|-------------|------------|------------|
| 68441          | Rraga             | Ras-related GTP binding     | 2105.27734  | 2910.85962 | 5879.90332 |
| 52858          | Cdipt             | CDP-diacylglycerol--ino     | 2423.22412  | 2577.42773 | 5688.26562 |
| 235036         | Ppan              | peter pan homolog (Dros     | 1682.99341  | 2515.81396 | 5636.04541 |
| 225995         | D030056L22Rik     | RIKEN cDNA D030056          | 637.429077  | 803.960083 | 5635.1123  |
| 26356          | Ing1              | inhibitor of growth famil   | 605.947876  | 901.27002  | 5630.49414 |
| 21915          | Dtymk             | deoxythymidylate kinase     | 784.417236  | 1153.40527 | 5599.87402 |
| 50927          | Nasp              | nuclear autoantigenic spe   | 504.944122  | 540.17749  | 5531.27393 |
| 20901          | Strap             | serine/threonine kinase r   | 1529.17896  | 2124.5144  | 5416.19238 |
| 13204          | Dhx15             | DEAH (Asp-Glu-Ala-Hi        | 1718.51587  | 2084.04492 | 5411.64209 |
| 75062          | Sf3a3             | splicing factor 3a, subun   | 1292.39197  | 1383.73413 | 5293.65332 |
| 230075         | Ndufb6            | NADH dehydrogenase (u       | 2193.62158  | 2162.42871 | 5272.61133 |
| 26754          | Cops5             | COP9 (constitutive phot     | 1820.12476  | 2331.00098 | 5222.40625 |
| 67180          | Yipf5             | Yip1 domain family, me      | 1757.02783  | 2477.68018 | 5202       |
| 66868          | Mfsd1             | major facilitator superfar  | 2480.6167   | 2485.00977 | 5201.33105 |
| 22370          | Vtn               | vitronectin                 | 1819.39771  | 2497.65039 | 5196.41943 |
| 27979          | Eif3b             | eukaryotic translation ini  | 1050.45959  | 1294.08911 | 5170.88965 |
| 226016         | Fam108b           | family with sequence sim    | 1210.18799  | 1651.8811  | 5072.93115 |
| 66890          | Lman2             | lectin, mannose-binding     | 21981.67334 | 2013.45752 | 5060.84961 |
| 18813          | Pa2g4             | proliferation-associated 2  | 2154.70581  | 2448.55664 | 5035.33154 |
| 68051100043462 | Nutf2 Nutf2-ps1 G | nuclear transport factor 2  | 1241.45996  | 1536.38916 | 5029.72266 |
| 211652         | Wwc1              | WW, C2 and coiled-coil      | 968.250732  | 1162.26001 | 4961.27051 |
| 53893          | Nudt5             | nudix (nucleoside diphos    | 566.810242  | 596.386963 | 4956.22607 |
| 97820          | 4833439L19Rik     | RIKEN cDNA 4833439L         | 1501.7627   | 2146.50317 | 4948.20703 |
| 216443         | Mars              | methionine-tRNA synthe      | 1324.65723  | 1955.45544 | 4917.68799 |
| 70396          | Asnsd1            | asparagine synthetase do    | 1760.08374  | 1778.32007 | 4909.80664 |
| 75616          | 2810008M24Rik     | RIKEN cDNA 2810008M         | 895.726196  | 996.926147 | 4905.63965 |
| 19823          | Rnf7              | ring finger protein 7       | 1593.05859  | 2347.98291 | 4898.93164 |
| 76936          | Hnrmpm            | heterogeneous nuclear ri    | 1635.4231   | 2038.84473 | 4858.19189 |
| 105083         | Pelo              | pelota homolog (Drosop      | 1726.88843  | 2022.0929  | 4832.93311 |
| 29864          | Rnf11             | ring finger protein 11      | 2117.70532  | 1500.91943 | 4809.07129 |
| 14976          | H2-Ke2            | H2-K region expressed g     | 1635.21094  | 2321.09912 | 4781.37012 |
| 20311          | Cxcl5             | chemokine (C-X-C motif      | 50          | 59.2016945 | 4778.77588 |
| 70025          | Acot7             | acyl-CoA thioesterase 7     | 369.292419  | 464.197205 | 4771.59961 |
| 97130          | C77080            | expressed sequence C770     | 1871.82983  | 2217.97607 | 4715.80371 |
| 266781         | Snx17             | sorting nexin 17            | 1236.02942  | 1787.88501 | 4667.7417  |
| 19352          | Rabggtb           | RAB geranylgeranyl tran     | 1649.12646  | 1859.43579 | 4647.63281 |
| 72692          | Hnrpll            | heterogeneous nuclear ri    | 866.386841  | 1288.99316 | 4632.82227 |
| 381038         | Parl              | presenilin associated, rho  | 997.922852  | 1303.46436 | 4626.88477 |
| 19718          | Rfc2              | replication factor C (acti  | 955.380737  | 1042.25366 | 4617.36865 |
| 22234          | Ugcg              | UDP-glucose ceramide g      | 1318.46313  | 1519.5625  | 4568.82324 |
| 56736          | Rnf14             | ring finger protein 14      | 1314.74658  | 1912.50464 | 4558.83057 |
| 66521          | Rwdd1             | RWD domain containing       | 400.236572  | 561.157715 | 4525.69043 |
| 67781          | Ilf2              | interleukin enhancer bind   | 468.612152  | 647.564453 | 4519.09668 |
| 76561          | Snx7              | sorting nexin 7             | 417.116211  | 526.917297 | 4480.96289 |
| 225288         | Fhod3             | formin homology 2 dom       | 89.1428223  | 73.6954803 | 4479.43066 |
| 66997          | Psm12             | proteasome (prosome, m      | 1685.58362  | 1828.65857 | 4421.28906 |
| 17846          | Commd1            | COMM domain containi        | 839.244751  | 1068.35815 | 4413.90723 |
| 19720          | Trim27            | tripartite motif-containi   | 838.956421  | 1122.22351 | 4391.89893 |
| 19139          | Prps1             | phosphoribosyl pyrophos     | 1144.14587  | 1337.57605 | 4374.07617 |
| 22122          | Tsta3             | tissue specific transplanta | 1636.94714  | 2038.23486 | 4301.2085  |
| 69790          | Med30             | mediator complex subun      | 540.081665  | 655.445801 | 4290.92676 |
| 12540          | Cdc42             | cell division cycle 42 ho   | 1526.6853   | 1869.87073 | 4287.59229 |
| 66366          | Ergic3            | ERGIC and golgi 3           | 717.77002   | 811.279785 | 4268.83936 |
| 67205          | Utp11l            | UTP11-like, U3 small nu     | 916.891113  | 1295.01147 | 4234.64941 |
| 433702         | Ncbp1             | nuclear cap binding prote   | 954.972046  | 960.7547   | 4214.5     |
| 15115          | Hars              | histidyl-tRNA synthetase    | 904.572388  | 1102.03967 | 4207.73096 |
| 64657          | Mrps10            | mitochondrial ribosomal     | 1815.8855   | 1710.22546 | 4171.5625  |
| 70356          | St13              | suppression of tumoriger    | 993.441101  | 1295.23926 | 4149.62793 |
| 226830         | Smyd2             | SET and MYND domain         | 1237.62146  | 1694.39758 | 4118.03467 |
| 71974          | Prmt3             | protein arginine N-methy    | 1257.03589  | 1841.68237 | 4105.13672 |
| 109054         | Pfdn4             | prefoldin 4                 | 462.435333  | 615.480042 | 4084.16357 |

|        |               |                            |            |            |            |
|--------|---------------|----------------------------|------------|------------|------------|
| 56445  | Dnaja2        | DnaJ (Hsp40) homolog,      | 1011.54846 | 1030.87231 | 4059.19897 |
| 12977  | Csf1          | colony stimulating factor  | 142.42099  | 204.742203 | 4047.95752 |
| 66917  | Chorde1       | cysteine and histidine-ric | 1684.104   | 1128.63501 | 4039.72461 |
| 77862  | Thyn1         | thymocyte nuclear protei   | 1097.8667  | 1574.05322 | 4039.14795 |
| 68090  | Yif1a         | Yip1 interacting factor h  | 1977.93469 | 1919.79468 | 4002.56543 |
| 14620  | Gjb3          | gap junction protein, beta | 50         | 50         | 3979.72559 |
| 66126  | Elof1         | elongation factor 1 homc   | 1227.58081 | 1399.76282 | 3961.93213 |
| 72612  | 2700029M09Rik | RIKEN cDNA 2700029M        | 791.207153 | 820.946594 | 3928.8894  |
| 70160  | Vps36         | vacuolar protein sorting   | 1308.17212 | 1562.60815 | 3925.64062 |
| 11933  | Atp1b3        | ATPase, Na+/K+ transp      | 1319.28223 | 1903.14209 | 3919.88916 |
| 66958  | Tmx2          | thioredoxin-related trans  | 1443.34546 | 1910.698   | 3917.0625  |
| 12539  | Cdc37         | cell division cycle 37 ho  | 844.151001 | 1200.82666 | 3898.97681 |
| 229877 | Rap1gds1      | RAP1, GTP-GDP dissoci      | 1000.1803  | 1292.52148 | 3884.86938 |
| 67166  | Arl8b         | ADP-ribosylation factor-   | 1205.25952 | 1798.49963 | 3883.82422 |
| 60411  | Cenpk         | centromere protein K       | 114.27771  | 139.752899 | 3855.39233 |
| 12181  | Bop1          | block of proliferation 1   | 424.340149 | 558.625366 | 3840.55371 |
| 54709  | Eif3i         | eukaryotic translation ini | 604.642456 | 454.452637 | 3804.72876 |
| 66537  | Pomp          | proteasome maturation p    | 881.918335 | 1136.54468 | 3795.82715 |
| 67618  | Aasdhpt       | aminoadipate-semialdehy    | 972.868652 | 729.306885 | 3789.91797 |
| 229877 | Rap1gds1      | RAP1, GTP-GDP dissoci      | 804.959595 | 949.234619 | 3772.97754 |
| 27407  | Abcf2         | ATP-binding cassette, su   | 245.924591 | 286.812805 | 3760.19287 |
| 66928  | 3110001D03Rik | RIKEN cDNA 3110001D        | 1198.66284 | 1244.88232 | 3747.14697 |
| 22680  | Zfp207        | zinc finger protein 207    | 707.084656 | 934.633301 | 3715.23291 |
| 68079  | Pdcd2l        | programmed cell death 2    | 1082.67432 | 1568.45093 | 3685.54053 |
| 13511  | Dsg2          | desmoglein 2               | 1288.88135 | 1692.77637 | 3683.83154 |
| 59050  | Nsa2          | NSA2 ribosome biogene      | 810.848022 | 1013.46704 | 3677.84863 |
| 83703  | Dbr1          | debranching enzyme hor     | 511.176392 | 500.150818 | 3639.82471 |
| 17220  | Mcm7          | minichromosome mainte      | 231.389557 | 345.462769 | 3595.54858 |
| 195040 | Tmem199       | transmembrane protein 1    | 672.062744 | 932.569214 | 3587.08398 |
| 68565  | Mrps18a       | mitochondrial ribosomal    | 1020.40576 | 1427.77002 | 3532.04932 |
| 12757  | Clta          | clathrin, light polypeptid | 911.57135  | 1146.03601 | 3512.05566 |
| 20479  | Vps4b         | vacuolar protein sorting   | 1332.49756 | 1669.70801 | 3511.63477 |
| 66399  | Tsfm          | Ts translation elongation  | 651.53949  | 948.617798 | 3507.27539 |
| 70358  | Steap1        | six transmembrane epithe   | 50         | 50         | 3463.28516 |
| 66310  | Dpy30         | dpy-30 homolog (C. eleg    | 820.56073  | 1180.83386 | 3434.83496 |
| 14227  | Fkbp2         | FK506 binding protein 2    | 1136.47998 | 1501.11035 | 3434.62646 |
| 69885  | 2610002D18Rik | RIKEN cDNA 2610002D        | 50         | 69.6281662 | 3406.7959  |
| 20224  | Sar1a         | SAR1 gene homolog A (      | 517.766602 | 640.488037 | 3380.73682 |
| 72084  | Pigx          | phosphatidylinositol gly   | 1296.04041 | 1420.65674 | 3377.97607 |
| 107732 | Mrpl10        | mitochondrial ribosomal    | 782.145508 | 1002.09277 | 3376.08496 |
| 100972 | Rab28         | RAB28, member RAS o        | 968.784668 | 1125.86206 | 3364.24658 |
| 17218  | Mcm5          | minichromosome mainte      | 50         | 50         | 3345.2998  |
| 28106  | D17Wsu104e    | DNA segment, Chr 17, N     | 807.700195 | 826.205078 | 3316.40283 |
| 209354 | Eif2b1        | eukaryotic translation ini | 751.263184 | 892.515747 | 3305.13672 |
| 223691 | Eif3l         | eukaryotic translation ini | 707.995544 | 837.494507 | 3291.25757 |
| 13722  | Aimp1         | aminoacyl tRNA synthet     | 703.160583 | 1033.18823 | 3284.62207 |
| 13726  | Emd           | emerin                     | 289.703888 | 359.196838 | 3278.76855 |
| 15182  | Hdac2         | histone deacetylase 2      | 521.825317 | 691.840881 | 3248.5144  |
| 68184  | Denr          | density-regulated protein  | 1131.56885 | 1383.76233 | 3243.24951 |
| 66495  | Ndufb3        | NADH dehydrogenase (u      | 1116.51111 | 1078.54688 | 3241.67017 |
| 109778 | Blvra         | biliverdin reductase A     | 1023.84668 | 1492.30518 | 3241.62915 |
| 60409  | Trappc4       | trafficking protein partic | 222.448334 | 227.558777 | 3239.53223 |
| 68115  | 9430016H08Rik | RIKEN cDNA 9430016H        | 1085.08545 | 1512.93604 | 3237.91357 |
| 67767  | Jagn1         | jagunal homolog 1 (Dros    | 964.222168 | 1280.57983 | 3231.3457  |
| 66998  | Psmc5         | proteasome (prosome, m     | 825.473328 | 1116.61694 | 3229.44922 |
| 66844  | Ormdl2        | ORM1-like 2 (S. cerevis    | 1223.52222 | 1274.14294 | 3207.68896 |
| 66671  | Ccnh          | cyclin H                   | 1103.78369 | 1166.25659 | 3204.23486 |
| 66407  | Mrps15        | mitochondrial ribosomal    | 978.39917  | 1130.6311  | 3163.04639 |
| 68794  | Flnc          | filamin C, gamma           | 50         | 50         | 3161.68896 |
| 72635  | Lins          | lines homolog (Drosophi    | 997.33667  | 1049.99512 | 3043.66748 |
| 74168  | Zdhc16        | zinc finger, DHHC doma     | 268.743347 | 380.52655  | 3034.64941 |



|                 |                |                            |            |            |            |
|-----------------|----------------|----------------------------|------------|------------|------------|
| 268996          | Ss18           | synovial sarcoma translo   | 970.324524 | 1322.2688  | 3019.0022  |
| 28015           | Polr2m         | polymerase (RNA) II (D     | 802.953979 | 967.582092 | 3017.88965 |
| 12928           | Crk            | v-crk sarcoma virus CT1    | 558.168457 | 766.895874 | 2989.63184 |
| 74137           | Nuak2          | NUAK family, SNF1-lik      | 496.332458 | 539.908691 | 2964.01831 |
| 105148          | Iars           | isoleucine-tRNA synthet    | 409.914429 | 581.587646 | 2956.49854 |
| 58184           | Rqcd1          | red1 (required for cell di | 532.933716 | 774.533936 | 2953.26953 |
| 100505064 56397 | LOC100505064 M | mortality factor 4-like pr | 231.319855 | 249.437378 | 2950.27246 |
| 20638           | Snrpb          | small nuclear ribonucleo   | 551.513245 | 772.339722 | 2948.97266 |
| 109075          | Exosc4         | exosome component 4        | 811.046021 | 949.289795 | 2929.7561  |
| 66618           | Snmp27         | small nuclear ribonucleo   | 958.962646 | 1312.57666 | 2928.02393 |
| 17274           | Rab8a          | RAB8A, member RAS G        | 1253.5332  | 1434.15186 | 2921.8667  |
| 56258           | Hnrnp2         | heterogeneous nuclear ri   | 726.491089 | 1057.01917 | 2916.00537 |
| 68572           | Ict1           | immature colon carcinom    | 1049.85278 | 1405.53625 | 2912.12695 |
| 66799           | Ube2w          | ubiquitin-conjugating en   | 682.10022  | 986.778442 | 2911.15283 |
| 22402           | Wisp1          | WNT1 inducible signalin    | 50         | 67.9531403 | 2909.91699 |
| 66073           | Txndc12        | thioredoxin domain cont    | 1032.11621 | 1142.88831 | 2894.1958  |
| 56390           | Sssca1         | Sjogren's syndrome/scler   | 353.886108 | 429.76297  | 2891.61255 |
| 11772           | Ap2a2          | adaptor protein complex    | 898.151611 | 1138.4021  | 2870.61816 |
| 15528           | Hspe1          | heat shock protein 1 (cha  | 498.773682 | 632.538696 | 2857.49487 |
| 68026           | 2810417H13Rik  | RIKEN cDNA 2810417H        | 50         | 50         | 2851.17822 |
| 11732           | Ank            | progressive ankylosis      | 676.810608 | 591.118652 | 2837.18262 |
| 20492           | Slbp           | stem-loop binding protei   | 346.250244 | 507.791748 | 2828.97754 |
| 83435           | Plekha3        | pleckstrin homology dom    | 480.243286 | 651.985474 | 2817.98096 |
| 94067           | Mrpl43         | mitochondrial ribosomal    | 961.543335 | 1097.55371 | 2790.34082 |
| 53356           | Eif3g          | eukaryotic translation ini | 1032.56921 | 1354.38574 | 2782.29883 |
| 110959          | Nudt19         | nudix (nucleoside diphos   | 780.128845 | 931.215332 | 2774.33228 |
| 380601          | Fastkd5        | FAST kinase domains 5      | 1007.21252 | 1188.00928 | 2759.72192 |
| 242960          | Fbx15          | F-box and leucine-rich re  | 540.680481 | 544.87854  | 2758.37109 |
| 27756           | Lsm2           | LSM2 homolog, U6 sma       | 524.157288 | 723.928101 | 2745.51074 |
| 67841           | Atg3           | autophagy-related 3 (yea   | 1111.28638 | 1019.61829 | 2745.11328 |
| 66201           | Vta1           | Vps20-associated 1 hom     | 249.645844 | 325.775574 | 2744.073   |
| 66206           | 1110059E24Rik  | RIKEN cDNA 1110059E        | 431.806458 | 456.127655 | 2741.82031 |
| 70396           | Asnsd1         | asparagine synthetase do   | 1179.54639 | 1309.40198 | 2722.58081 |
| 18120           | Mrpl49         | mitochondrial ribosomal    | 1197.3147  | 922.200806 | 2720.72217 |
| 72519           | Tmem55a        | transmembrane protein 5    | 544.978394 | 559.242188 | 2706.80518 |
| 19944           | Rpl29          | ribosomal protein L29      | 135.372894 | 198.039276 | 2701.66699 |
| 11538           | Adnp           | activity-dependent neuro   | 1033.45166 | 1315.81201 | 2694.91626 |
| 19177           | Psmb7          | proteasome (prosome, m     | 622.585083 | 829.758911 | 2688.69482 |
| 75734           | Mff            | mitochondrial fission fac  | 510.010376 | 729.264404 | 2675.43042 |
| 245474          | Dkc1           | dyskeratosis congenita 1   | 504.516388 | 567.441895 | 2646.88672 |
| 13800           | Enah           | enabled homolog (Droso     | 50         | 50         | 2642.60278 |
| 26440           | Psmal          | proteasome (prosome, m     | 900.592896 | 1130.13452 | 2624.33618 |
| 108062          | Cstf2          | cleavage stimulation fact  | 805.50769  | 932.867737 | 2622.53174 |
| 67665           | Dctn4          | dynactin 4                 | 805.85144  | 1175.06738 | 2609.17041 |
| 268996          | Ss18           | synovial sarcoma translo   | 772.904907 | 1094.36487 | 2605.06396 |
| 77809           | Lrrc42         | leucine rich repeat conta  | 550.906494 | 593.628296 | 2603.05762 |
| 109145          | Gins4          | GINS complex subunit 4     | 711.403198 | 1007.03711 | 2600.37891 |
| 66230           | Mrps28         | mitochondrial ribosomal    | 919.197632 | 1062.41919 | 2594.59277 |
| 100504952 23827 | LOC100504952 B | uncharacterized LOC100     | 799.974121 | 1021.80963 | 2586.97461 |
| 20523           | Slc25a14       | solute carrier family 25 ( | 402.985168 | 565.383484 | 2586.49658 |
| 16906           | Lmnb1          | lamin B1                   | 50         | 50.1319389 | 2535.09033 |
| 69082           | Zc3h15         | zinc finger CCCH-type c    | 618.654724 | 833.083496 | 2523.89795 |
| 17826           | Fam89b         | family with sequence sim   | 406.601868 | 607.929688 | 2514.64941 |
| 12856           | Cox17          | cytochrome c oxidase, su   | 782.324585 | 1067.44849 | 2507.72632 |
| 14168           | Fgf13          | fibroblast growth factor   | 50         | 50         | 2503.14014 |
| 68153           | Gtf2e2         | general transcription fact | 558.233398 | 633.84021  | 2498.57007 |
| 80914           | Uck2           | uridine-cytidine kinase 2  | 50         | 68.5147858 | 2496.08887 |
| 68499           | Mrpl53         | mitochondrial ribosomal    | 664.805542 | 918.594604 | 2480.97217 |
| 381493          | S100a7a        | S100 calcium binding pr    | 50         | 50         | 2477.35693 |
| 101739          | Psip1          | PC4 and SFRS1 interacti    | 336.491577 | 309.421417 | 2465.69971 |
| 67383           | 2410127L17Rik  | RIKEN cDNA 2410127L        | 495.022278 | 635.177124 | 2443.87891 |

|              |               |                                                                                      |            |            |            |
|--------------|---------------|--------------------------------------------------------------------------------------|------------|------------|------------|
| 26914        | H2afy         | H2A histone family, member 1                                                         | 556.340271 | 817.528625 | 2412.44458 |
| 22409        | Wnt10a        | wingless related MMTV domain containing 10                                           | 50         | 50         | 2394.02515 |
| 269704       | Zfp664        | zinc finger protein 664                                                              | 478.743103 | 632.466553 | 2390.78125 |
| 103733       | Tubg1         | tubulin, gamma 1                                                                     | 482.324951 | 648.5802   | 2389.56055 |
| 20930        | Surf1         | surfeit gene 1                                                                       | 950.284363 | 720.951538 | 2364.97217 |
| 18769        | Pkig          | protein kinase inhibitor, gamma                                                      | 909.399414 | 1173.32593 | 2363.24512 |
| 53598        | Dctn3         | dynactin 3                                                                           | 451.686584 | 570.960266 | 2356.42725 |
| 64656        | Mrps23        | mitochondrial ribosomal protein S23                                                  | 926.247314 | 1037.79028 | 2348.60205 |
| 69535        | 2310004N24Rik | RIKEN cDNA 2310004N24                                                                | 356.341614 | 414.519409 | 2344.23584 |
| 12042        | Bcl10         | B cell leukemia/lymphoma 10                                                          | 682.527954 | 983.119934 | 2335.99951 |
| 52392        | D1Ert622e     | DNA segment, Chr 1, Ectoderm                                                         | 350.115723 | 497.693481 | 2335.17139 |
| 14181        | Fgfbp1        | fibroblast growth factor binding protein 1                                           | 50         | 71.6894073 | 2327.40039 |
| 16329        | Inpp1         | inositol polyphosphate 1-phosphatase                                                 | 427.014282 | 389.937256 | 2320.66797 |
| 101214       | Tra2a         | transformer 2 alpha homolog                                                          | 658.970947 | 860.564331 | 2306.82007 |
| 320438       | Alg6          | asparagine-linked glycosyltransferase 6                                              | 990.07312  | 895.638    | 2305.45605 |
| 99167        | Ssx2ip        | synovial sarcoma, X breakpoint region 2 interacting protein                          | 630.873657 | 794.283447 | 2303.50391 |
| 68861        | 1190002N15Rik | RIKEN cDNA 1190002N15                                                                | 810.892395 | 912.338806 | 2303.14746 |
| 67283        | Slc25a19      | solute carrier family 25 (mitochondrial anion carriers)                              | 548.938904 | 623.589233 | 2273.75098 |
| 56420        | Ppp4c         | protein phosphatase 4, catalytic subunit                                             | 452.000244 | 654.35791  | 2257.94922 |
| 74108        | Pam           | poly(A)-specific ribonuclease                                                        | 547.205811 | 726.583496 | 2257.92285 |
| 13626        | Eed           | embryonic ectoderm development 1                                                     | 657.602234 | 821.375244 | 2257.17676 |
| 20187        | Ryk           | receptor-like tyrosine kinase                                                        | 627.600708 | 781.720703 | 2256.6543  |
| 66229        | Rpl7l1        | ribosomal protein L7-like 1                                                          | 870.059021 | 770.596802 | 2240.54541 |
| 17184        | Matr3         | matrin 3                                                                             | 215.574509 | 251.729218 | 2239.74854 |
| 26891        | Cops4         | COP9 (constitutive photolyase) domain containing 4                                   | 237.835663 | 325.866089 | 2236.71973 |
| 56327        | Arl2          | ADP-ribosylation factor-like protein 2                                               | 89.1824341 | 105.594536 | 2225.7002  |
| 100048603    | LOC100048603  | 39S ribosomal protein L4                                                             | 367.758911 | 274.016693 | 2216.33984 |
| 13006        | Smc3          | structural maintenance of chromosomes 3                                              | 240.913757 | 247.187988 | 2207.92139 |
| 56443        | Arpc1a        | actin related protein 2/3 complex, subunit 1                                         | 953.810791 | 854.234863 | 2207.23145 |
| 52276        | Cdca8         | cell division cycle associated 8                                                     | 50         | 50         | 2191.11084 |
| 433653       | Gm5549        | predicted gene 5549                                                                  | 86.3831558 | 82.0281677 | 2188.83154 |
| 68240        | Rpa3          | replication protein A3                                                               | 256.345428 | 207.783844 | 2185.30347 |
| 26426        | Nubp2         | nucleotide binding protein 2                                                         | 691.22522  | 976.871094 | 2174.51855 |
| 28030        | Gfm1          | G elongation factor, mitochondrial                                                   | 972.564575 | 810.269714 | 2169.61377 |
| 52575        | Rg9mtd1       | RNA (guanine-9-) methyltransferase 1                                                 | 861.943176 | 694.634949 | 2168.33496 |
| 68612        | Ube2c         | ubiquitin-conjugating enzyme E2C                                                     | 50         | 73.2993622 | 2155.59326 |
| 59001        | Pole3         | polymerase (DNA directed) epsilon 3                                                  | 238.602417 | 256.348267 | 2148.60938 |
| 66596        | Gtf3a         | general transcription factor IIIA                                                    | 375.494568 | 499.7547   | 2140.84326 |
| 67949        | Mki67ip       | Mki67 (FHA domain) interacting protein                                               | 635.535889 | 831.493286 | 2139.80469 |
| 17766        | Nudt1         | nudix (nucleoside diphosphate-linked moiety X) motif 1                               | 680.291077 | 884.371216 | 2133.39746 |
| 69577        | Fastkd3       | FAST kinase domains 3                                                                | 300.956451 | 331.83905  | 2116.69043 |
| 68098        | Rchy1         | ring finger and CHY zinc finger domain containing 1                                  | 768.18396  | 1035.83936 | 2115.31152 |
| 66421        | 2410004B18Rik | RIKEN cDNA 2410004B18                                                                | 351.082062 | 515.956055 | 2113.32495 |
| 245841665137 | Polr2hGm7511  | polymerase (RNA) II (DNA directed) subunit h                                         | 358.439087 | 488.367645 | 2108.52832 |
| 69048        | Slc30a5       | solute carrier family 30 (inositol trisphosphate and cyclic ADP-ribose transporters) | 733.466309 | 863.888916 | 2104.02246 |
| 17192        | Mbd3          | methyl-CpG binding domain protein 3                                                  | 591.582336 | 611.088745 | 2101.83203 |
| 66310        | Dpy30         | dpy-30 homolog (C. elegans)                                                          | 565.834351 | 724.256287 | 2097.61694 |
| 67864        | Yipf4         | Yip1 domain family, member 4                                                         | 850.223267 | 852.108582 | 2096.72949 |
| 76561        | Snx7          | sorting nexin 7                                                                      | 496.048859 | 605.94342  | 2089.94775 |
| 19272        | Ptprk         | protein tyrosine phosphatase related kinase                                          | 525.367615 | 614.775513 | 2088.6958  |
| 66818        | 9130011J15Rik | RIKEN cDNA 9130011J15                                                                | 640.950684 | 859.538696 | 2083.80518 |
| 100102       | Pcsk9         | proprotein convertase subtilisin/kexin type 9                                        | 482.94278  | 508.892395 | 2079.65601 |
| 19946        | Rpl30         | ribosomal protein L30                                                                | 206.842407 | 280.453644 | 2078.24609 |
| 18674        | Slc25a3       | solute carrier family 25 (mitochondrial anion carriers)                              | 839.091064 | 959.014587 | 2076.42383 |
| 56418        | Ykt6          | YKT6 homolog (S. cerevisiae)                                                         | 772.687866 | 787.495605 | 2069.98877 |
| 20496        | Slc12a2       | solute carrier family 12, member 2                                                   | 283.58255  | 280.563995 | 2069.51538 |
| 65961        | Utp3          | UTP3, small subunit (SSU) of RNA polymerase III                                      | 550.607056 | 803.213135 | 2051.073   |
| 216363       | Rab3ip        | RAB3A interacting protein                                                            | 544.042114 | 717.410461 | 2050.2793  |
| 19361        | Rad51         | RAD51 homolog (S. cerevisiae)                                                        | 50         | 50         | 2039.64233 |
| 14467        | Gbas          | glioblastoma amplified sequence                                                      | 712.594482 | 1004.2771  | 2029.29297 |
| 59052        | Mettl9        | methyltransferase like 9                                                             | 304.652405 | 393.676331 | 2028.64404 |

|              |                |                             |            |            |            |
|--------------|----------------|-----------------------------|------------|------------|------------|
| 231440       | Parm1          | prostate androgen-regula    | 50         | 74.0816956 | 2018.59863 |
| 14976        | H2-Ke2         | H2-K region expressed g     | 656.550293 | 802.320435 | 2018.14014 |
| 109077       | Ints5          | integrator complex subu     | 249.715561 | 348.549683 | 2012.85376 |
| 67282        | Ccdc53         | coiled-coil domain conta    | 619.844482 | 583.392822 | 2010.68298 |
| 52443        | Mrp148         | mitochondrial ribosomal     | 890.441284 | 991.086243 | 2010.51208 |
| 68250        | Fam96a         | family with sequence sin    | 518.064453 | 615.304626 | 2009.61816 |
| 50884        | Nckap1         | NCK-associated protein      | 400.390228 | 526.518372 | 1999.69775 |
| 22225        | Usp5           | ubiquitin specific peptid   | 758.873657 | 668.33252  | 1999.37573 |
| 70285        | Rpf1           | ribosome production fact    | 392.515167 | 574.661194 | 1988.78809 |
| 56452        | Orc6           | origin recognition compl    | 114.173157 | 165.909607 | 1985.49988 |
| 53861        | Zranb2         | zinc finger, RAN-binding    | 682.627808 | 984.158325 | 1978.08545 |
| 102209       | Snape2         | small nuclear RNA activ     | 252.280365 | 365.526306 | 1965.46021 |
| 380863       | Tmem171        | transmembrane protein 1     | 50         | 55.82901   | 1961.8269  |
| 228410       | Cstf3          | cleavage stimulation fact   | 359.753967 | 341.638794 | 1958.18701 |
| 66194        | Pycl           | pyrroline-5-carboxylate r   | 421.963837 | 470.491272 | 1953.68286 |
| 69617        | Pitrm1         | pitrilysin metallopeptidase | 460.219055 | 383.701172 | 1950.29773 |
| 66070        | Cwc15          | CWC15 homolog (S. cer       | 623.774841 | 785.775269 | 1913.75806 |
| 14056        | Ezh2           | enhancer of zeste homolo    | 94.5623627 | 121.312057 | 1904.24023 |
| 26886        | Cenph          | centromere protein H        | 50         | 50         | 1902.96826 |
| 66815        | Ccdc109b       | coiled-coil domain conta    | 50         | 50         | 1901.91162 |
| 230484       | Usp1           | ubiquitin specific peptid   | 97.8448334 | 86.7901077 | 1901.2478  |
| 224045       | Eif2b5         | eukaryotic translation ini  | 361.681946 | 479.099854 | 1901.00952 |
| 15975        | Ifnar1         | interferon (alpha and bet   | 733.071777 | 910.570374 | 1899.31201 |
| 54638        | Ccdc22         | coiled-coil domain conta    | 757.045532 | 869.919861 | 1893.85474 |
| 66789        | Alg14          | asparagine-linked glycos    | 559.090454 | 820.369385 | 1881.42664 |
| 60315        | Myg1           | melanocyte proliferating    | 395.309692 | 566.085205 | 1878.80884 |
| 69860        | Eif1ad         | eukaryotic translation ini  | 431.483276 | 604.697083 | 1858.20227 |
| 69085        | Zcchc9         | zinc finger, CCHC doma      | 233.113159 | 305.870483 | 1857.34778 |
| 110119       | Mpi            | mannose phosphate isom      | 355.539978 | 434.878601 | 1855.78345 |
| 12370        | Casp8          | caspase 8                   | 365.865784 | 525.327148 | 1851.93652 |
| 238673       | Zfp367         | zinc finger protein 367     | 194.583893 | 160.122009 | 1847.44702 |
| 75624        | Metap1         | methionyl aminopeptidas     | 254.522003 | 335.75354  | 1845.03638 |
| 225908       | Gm98           | predicted gene 98           | 303.023834 | 446.155334 | 1843.099   |
| 329934       | Foxo6          | forkhead box O6             | 50         | 50         | 1841.65283 |
| 108664       | Atp6v1h        | ATPase, H+ transporting     | 605.151001 | 838.160889 | 1838.85107 |
| 94062        | Mrp13          | mitochondrial ribosomal     | 323.650085 | 387.680786 | 1838.5127  |
| 226971       | Plekhh2        | pleckstrin homology dom     | 368.660339 | 490.662323 | 1832.08252 |
| 12235        | Bub1           | budding uninhibited by b    | 50         | 50         | 1825.79199 |
| 14479        | Usp15          | ubiquitin specific peptid   | 577.356201 | 718.098022 | 1821.68713 |
| 56844        | Tssc4          | tumor-suppressing subch     | 734.983948 | 793.571777 | 1816.23645 |
| 28135        | Cep63          | centrosomal protein 63      | 336.212769 | 481.745361 | 1810.28943 |
| 100972       | Rab28          | RAB28, member RAS o         | 258.626678 | 243.042862 | 1808.70703 |
| 26572        | Cops3          | COP9 (constitutive phot     | 365.73114  | 459.315002 | 1797.35693 |
| 73274        | Gbp1           | GC-rich promoter bindin     | 532.455322 | 697.320068 | 1795.42932 |
| 108143       | Taf9           | TAF9 RNA polymerase         | 225.726044 | 252.050369 | 1791.73853 |
| 17083        | Tmed1          | transmembrane emp24 d       | 603.13269  | 594.052734 | 1780.50842 |
| 66231        | Thoc7          | THO complex 7 homolo        | 505.965942 | 733.522705 | 1779.13794 |
| 66442        | Spc25          | SPC25, NDC80 kinetoch       | 201.69693  | 207.011414 | 1770.70142 |
| 67711        | Nsmce1         | non-SMC element 1 hom       | 370.179565 | 536.110107 | 1770.55029 |
| 104303       | Arl1           | ADP-ribosylation factor-    | 413.097076 | 409.163269 | 1770.47949 |
| 11837        | Rplp0          | ribosomal protein, large,   | 537.382141 | 793.518066 | 1767.20618 |
| 98710        | Rabif          | RAB interacting factor      | 260.419983 | 274.22467  | 1759.90503 |
| 853051631033 | Kars1LOC631033 | lysyl-tRNA synthetase       | 417.919373 | 549.221741 | 1759.37598 |
| 21974        | Top2b          | topoisomerase (DNA) II      | 551.608276 | 670.689453 | 1757.82642 |
| 20833        | Ssrp1          | structure specific recogni  | 351.943848 | 495.963257 | 1754.69263 |
| 230393       | BC057079       | cDNA sequence BC0570        | 648.779785 | 662.590149 | 1753.89575 |
| 68087        | Dcakd          | dephospho-CoA kinase c      | 737.963867 | 771.265991 | 1746.76221 |
| 14590        | Ggh            | gamma-glutamyl hydroly      | 662.787292 | 755.298035 | 1736.12378 |
| 20530        | Slc31a2        | solute carrier family 31,   | 385.257965 | 563.916382 | 1735.38586 |
| 52551        | Sgta           | small glutamine-rich tet    | 654.414795 | 814.542175 | 1717.03223 |
| 241576       | Ldlrad3        | low density lipoprotein r   | 364.032898 | 540.801331 | 1700.2561  |

|              |               |                             |            |            |            |
|--------------|---------------|-----------------------------|------------|------------|------------|
| 21454        | Tcp1          | t-complex protein 1         | 503.580139 | 410.87085  | 1697.31458 |
| 76563        | Qrs11         | glutaminy1-tRNA synth       | 377.706085 | 534.40686  | 1696.18567 |
| 70083        | Metrn         | meteorin, glial cell differ | 276.230286 | 300.95575  | 1695.01245 |
| 13445        | Cdk2ap1       | CDK2 (cyclin-dependent      | 90.0046234 | 112.693588 | 1694.72485 |
| 80751        | Rnf34         | ring finger protein 34      | 382.747009 | 495.632233 | 1687.24133 |
| 11545        | Parp1         | poly (ADP-ribose) polym     | 617.439636 | 790.557007 | 1685.03772 |
| 226162       | Dped          | deleted in primary ciliary  | 335.480896 | 360.430481 | 1676.16736 |
| 18567        | Pdcd2         | programmed cell death 2     | 502.628021 | 686.75354  | 1669.89502 |
| 78894        | Aacs          | acetoacetyl-CoA synthet     | 743.053833 | 720.237061 | 1659.73462 |
| 230734       | Yrdc          | yrdC domain containing      | 261.869537 | 241.708771 | 1659.02966 |
| 50786        | Hs6st2        | heparan sulfate 6-O-sulf    | 50         | 50         | 1658.57129 |
| 381801       | Tatdn2        | TatD DNase domain con       | 590.585876 | 816.106812 | 1641.75232 |
| 215387       | Ncaph         | non-SMC condensin I co      | 50         | 55.2447319 | 1633.90735 |
| 691091732482 | Fam58b1Gm9731 | family with sequence sim    | 467.57608  | 542.905029 | 1633.00354 |
| 76459        | Car12         | carbonic anhydrase 12       | 50         | 50         | 1628.50427 |
| 72043        | Sulf2         | sulfatase 2                 | 516.291748 | 596.179077 | 1624.63269 |
| 54141        | Spag5         | sperm associated antigen    | 50         | 68.8783646 | 1613.10022 |
| 19891        | Rpa2          | replication protein A2      | 240.226227 | 235.989075 | 1612.28345 |
| 22201        | Uba1          | ubiquitin-like modifier ac  | 207.769165 | 213.448364 | 1607.80396 |
| 266692       | Cpne1         | copine I                    | 145.489578 | 204.047577 | 1606.90503 |
| 216011       | Lrrc20        | leucine rich repeat conta   | 262.59668  | 368.013367 | 1604.30383 |
| 98766        | Ubac1         | ubiquitin associated dom    | 560.380005 | 707.174988 | 1599.86377 |
| 72373        | Psca          | prostate stem cell antigen  | 50         | 50         | 1598.32556 |
| 236792       | Mmgt1         | membrane magnesium tr       | 455.247864 | 537.860168 | 1592.97681 |
| 67082        | 1700011H14Rik | RIKEN cDNA 1700011H         | 50         | 50         | 1591.02295 |
| 12345        | Capzb         | capping protein (actin fil  | 183.540436 | 249.184158 | 1587.35181 |
| 72745        | Tmem161b      | transmembrane protein 1     | 319.451965 | 431.437988 | 1586.02734 |
| 231329       | Polr2b        | polymerase (RNA) II (D      | 411.398804 | 513.333191 | 1576.7561  |
| 109212       | Fam64a        | family with sequence sim    | 50         | 50         | 1563.96313 |
| 56705        | Ranbp9        | RAN binding protein 9       | 582.655396 | 737.847473 | 1553.77661 |
| 24128        | Xrn2          | 5'-3' exoribonuclease 2     | 352.048401 | 472.263916 | 1551.10791 |
| 269514       | Fbxl4         | F-box and leucine-rich re   | 566.656555 | 679.450806 | 1550.79395 |
| 67724        | Pop1          | processing of precursor 1   | 139.033966 | 133.481461 | 1545.9397  |
| 17295        | Met           | met proto-oncogene          | 748.733215 | 755.343262 | 1542.11426 |
| 11938        | Atp2a2        | ATPase, Ca++ transporti     | 312.791992 | 400.947998 | 1541.50293 |
| 29805        | Znhit2-ps     | zinc finger, HIT domain     | 739.213745 | 655.102051 | 1533.47717 |
| 18221        | Nudc          | nuclear distribution gene   | 274.750641 | 244.908875 | 1530.88403 |
| 217127       | Myst2         | MYST histone acetyltran     | 304.238892 | 427.438599 | 1530.82007 |
| 72098        | Tmem68        | transmembrane protein 6     | 299.441956 | 430.811279 | 1528.11353 |
| 67967        | Pold3         | polymerase (DNA-direct      | 518.363892 | 688.3479   | 1527.80298 |
| 17349        | Mlf1          | myeloid leukemia factor     | 50         | 50         | 1520.2981  |
| 225215       | Rsl24d1       | ribosomal L24 domain c      | 511.415588 | 608.832275 | 1519.47314 |
| 66498        | Dda1          | DET1 and DDB1 associa       | 528.724548 | 747.394043 | 1503.9707  |
| 60530        | Figl1         | fidgetin-like 1             | 50         | 52.8199043 | 1503.25415 |
| 66241        | Tmem9         | transmembrane protein 9     | 338.997803 | 285.225494 | 1497.81982 |
| 109905       | Rap1a         | RAS-related protein-1a      | 301.997253 | 409.93573  | 1495.20544 |
| 27632        | Rdbp          | RD RNA-binding protein      | 363.310486 | 515.936279 | 1494.49561 |
| 73296        | Rhobtb3       | Rho-related BTB domain      | 109.824539 | 154.577728 | 1493.70349 |
| 17344        | Pias2         | protein inhibitor of activ  | 274.680939 | 377.329285 | 1484.12317 |
| 13838        | Epha4         | Eph receptor A4             | 50         | 50         | 1472.2522  |
| 229593       | Golph3l       | golgi phosphoprotein 3-l    | 253.894684 | 369.59079  | 1462.9397  |
| 66072        | Sdhaf2        | succinate dehydrogenase     | 254.656677 | 379.698944 | 1461.77307 |
| 74112        | Usp16         | ubiquitin specific peptid   | 710.409851 | 717.67926  | 1458.05762 |
| 268697       | Ccnb1         | cyclin B1                   | 50         | 61.1525917 | 1457.69287 |
| 104662       | Tsr1          | TSR1, 20S rRNA accum        | 523.843628 | 687.179382 | 1454.36523 |
| 18481        | Pak3          | p21 protein (Cdc42/Rac)     | 50         | 50         | 1449.32532 |
| 52715        | Ccdc43        | coiled-coil domain conta    | 328.128601 | 491.454559 | 1447.9696  |
| 67628        | Anp32b        | acidic (leucine-rich) nucl  | 451.152679 | 584.704224 | 1446.19324 |
| 240641       | Kif20b        | kinesin family member 2     | 50         | 50         | 1440.98413 |
| 20174        | Ruvbl2        | RuvB-like protein 2         | 292.976837 | 415.762939 | 1440.146   |
| 66492        | Zmat2         | zinc finger, matrin type 2  | 659.012146 | 595.250977 | 1438.70483 |

|                 |                  |                            |            |            |            |
|-----------------|------------------|----------------------------|------------|------------|------------|
| 66406           | Sac3d1           | SAC3 domain containing     | 143.800827 | 202.216934 | 1428.32422 |
| 433693          | Akirin2          | akirin 2                   | 448.413605 | 560.927124 | 1422.93933 |
| 231642          | Alkbh2           | alkB, alkylation repair h  | 404.773682 | 589.677002 | 1407.60425 |
| 74493           | Tnks2            | tankyrase, TRF1-interact   | 75.1258392 | 111.590111 | 1405.33655 |
| 74051           | Steap2           | six transmembrane epith    | 91.9769592 | 117.939362 | 1403.32031 |
| 77577           | Spns3            | spinster homolog 3 (Dros   | 50         | 50         | 1401.52246 |
| 99349           | Dnajc24          | DnaJ (Hsp40) homolog,      | 149.877808 | 199.185181 | 1395.98804 |
| 212627          | Prpsap2          | phosphoribosyl pyrophos    | 621.124512 | 626.019653 | 1392.38428 |
| 141131100044829 | FbllLOC100044829 | fibrillarin/rRNA 2'-O-me   | 111.622597 | 164.400116 | 1387.50879 |
| 69556           | Bod1             | biorientation of chromos   | 421.803833 | 536.824585 | 1381.72607 |
| 68355           | 2010204K13Rik    | RIKEN cDNA 2010204K13      | 50         | 50         | 1374.95752 |
| 67149           | Nkain1           | Na+/K+ transporting AT     | 50         | 50         | 1371.32251 |
| 68597           | 1110021J02Rik    | RIKEN cDNA 1110021J02      | 410.706543 | 407.683472 | 1371.21411 |
| 78832           | 2700078E11Rik    | RIKEN cDNA 2700078E11      | 655.838989 | 653.903809 | 1366.39929 |
| 72068           | Cnot2            | CCR4-NOT transcriptio      | 357.756287 | 437.17041  | 1364.26807 |
| 14265           | Fmr1             | fragile X mental retardat  | 258.078552 | 338.454254 | 1363.18506 |
| 73804           | Kif2c            | kinesin family member 2    | 50         | 50         | 1363.17847 |
| 72661           | Serp2            | stress-associated endopla  | 50         | 50         | 1355.89551 |
| 66506           | Psmg3            | proteasome (prosome, m     | 647.395264 | 634.352417 | 1355.85449 |
| 242960          | Fbx15            | F-box and leucine-rich re  | 612.129395 | 543.680298 | 1355.74597 |
| 209416          | Gpkow            | G patch domain and KO      | 283.691833 | 330.748291 | 1353.02966 |
| 15364           | Hmga2            | high mobility group AT-    | 50         | 50         | 1352.11108 |
| 69136           | Tusc1            | tumor suppressor candid    | 438.810181 | 318.390747 | 1351.8136  |
| 98402           | Sh3bp4           | SH3-domain binding pro     | 50         | 60.3702507 | 1350.72083 |
| 14375           | Xrcc6            | X-ray repair complement    | 285.52478  | 297.560425 | 1350.35596 |
| 67149           | Nkain1           | Na+/K+ transporting AT     | 50         | 50         | 1330.88    |
| 64655           | Mrps22           | mitochondrial ribosomal    | 371.280579 | 401.522369 | 1322.49927 |
| 18969           | Pola2            | polymerase (DNA direct     | 174.355255 | 220.690308 | 1320.66211 |
| 21770           | Ppp2r5d          | protein phosphatase 2, re  | 309.244965 | 453.926331 | 1315.93604 |
| 18187           | Nrp2             | neuropilin 2               | 430.745056 | 393.500916 | 1312.26172 |
| 68276           | Toe1             | target of EGR1, member     | 322.290833 | 396.948608 | 1308.60217 |
| 20306           | Ccl7             | chemokine (C-C motif) l    | 50         | 50         | 1307.13965 |
| 65105           | Arl6ip4          | ADP-ribosylation factor-   | 426.03363  | 558.041077 | 1306.71069 |
| 106021          | Topors           | topoisomerase I binding,   | 263.044983 | 308.671631 | 1306.40186 |
| 110854          | Ppp2r4           | protein phosphatase 2A,    | 598.142456 | 584.207703 | 1305.15295 |
| 67755           | Ddx47            | DEAD (Asp-Glu-Ala-As       | 252.171082 | 271.283447 | 1295.36401 |
| 445007          | Nup85            | nucleoporin 85             | 168.273529 | 241.864395 | 1286.86499 |
| 18645           | Pfn2             | profilin 2                 | 486.215759 | 503.601318 | 1264.89612 |
| 17216           | Mcm2             | minichromosome mainte      | 50         | 50         | 1259.85132 |
| 77975           | Tmem50b          | transmembrane protein 5    | 280.140076 | 367.354126 | 1257.54248 |
| 56412           | Noa1             | nitric oxide associated 1  | 240.853546 | 314.712463 | 1254.88525 |
| 231506          | Lin54            | lin-54 homolog (C. eleg    | 242.228638 | 305.032959 | 1253.13037 |
| 11767           | Aplm1            | adaptor-related protein c  | 419.452881 | 566.020142 | 1250.15918 |
| 20955           | Vamp7            | vesicle-associated memb    | 414.272552 | 589.852417 | 1247.6073  |
| 107271          | Yars             | tyrosyl-tRNA synthetase    | 574.531616 | 479.197449 | 1237.06738 |
| 78294           | Rps27a           | ribosomal protein S27A     | 136.239441 | 188.460205 | 1225.50696 |
| 76789           | Mzt1             | mitotic spindle organizin  | 282.351624 | 341.463379 | 1224.9137  |
| 108115          | Slco4a1          | solute carrier organic ani | 50         | 50         | 1218.63477 |
| 20321           | Frrs1            | ferric-chelate reductase 1 | 141.898209 | 184.194839 | 1217.87891 |
| 13175           | Dclk1            | doublecortin-like kinase   | 50         | 50         | 1217.43188 |
| 78523           | Mrp19            | mitochondrial ribosomal    | 517.836304 | 572.577271 | 1213.78052 |
| 67141           | Fbxo5            | F-box protein 5            | 50         | 67.7876205 | 1210.66492 |
| 667705          | Gm8773           | predicted gene 8773        | 50         | 50         | 1198.23022 |
| 69752           | Zfp511           | zinc finger protein 511    | 344.935364 | 484.137665 | 1197.21313 |
| 83815           | Cenpg            | centromere protein Q       | 70.0152206 | 95.1128922 | 1193.95776 |
| 70088           | Meaf6            | MYST/Esa1-associated f     | 240.031372 | 286.484619 | 1191.61121 |
| 13486           | Dr1              | down-regulator of transc   | 294.351929 | 351.945007 | 1189.26123 |
| 71835           | Lancl2           | LanC (bacterial lantibiot  | 88.2810211 | 132.345428 | 1187.55725 |
| 13605           | Ect2             | ect2 oncogene              | 50         | 61.0196075 | 1174.76758 |
| 66471           | Anp32e           | acidic (leucine-rich) nucl | 407.881897 | 541.827026 | 1164.79297 |
| 19225           | Ptgs2            | prostaglandin-endoperox    | 50         | 50         | 1162.63696 |

|                 |                   |                                                                      |            |            |            |
|-----------------|-------------------|----------------------------------------------------------------------|------------|------------|------------|
| 68618           | 1110012L19Rik     | RIKEN cDNA 1110012L19                                                | 232.420868 | 296.479584 | 1160.99707 |
| 66895           | 1300014I06Rik     | RIKEN cDNA 1300014I06                                                | 423.03949  | 456.218201 | 1156.44678 |
| 69305           | Deps              | decapping enzyme, scavenger                                          | 254.452316 | 306.57782  | 1154.87085 |
| 74268           | Aven              | apoptosis, caspase activator                                         | 449.95343  | 495.677521 | 1150.64941 |
| 12566           | Cdk2              | cyclin-dependent kinase 2                                            | 164.856415 | 189.365631 | 1143.97607 |
| 100503199       | 5430416N02Rik     | RIKEN cDNA 5430416N02                                                | 174.803589 | 206.316772 | 1142.45264 |
| 55988           | Snx12             | sorting nexin 12                                                     | 254.935501 | 211.111267 | 1140.76672 |
| 14758           | Gpm6b             | glycoprotein m6b                                                     | 50         | 50         | 1140.48242 |
| 26413           | Mapk1             | mitogen-activated protein kinase 1                                   | 76.3757706 | 99.7743835 | 1133.19946 |
| 216527          | Ccm2              | cerebral cavernous malformation 2                                    | 357.377655 | 499.757568 | 1129.65991 |
| 16560           | Kif1a             | kinesin family member 1                                              | 50         | 50         | 1128.4668  |
| 52443           | Mrpl48            | mitochondrial ribosomal protein L48                                  | 342.245422 | 341.242676 | 1127.70435 |
| 69612           | 2310037I24Rik     | RIKEN cDNA 2310037I24                                                | 273.535553 | 367.672424 | 1127.42004 |
| 75565           | Ccdc101           | coiled-coil domain containing 101                                    | 238.5327   | 180.007278 | 1125.12939 |
| 67581           | Tbc1d23           | TBC1 domain family, member 23                                        | 65.0788574 | 97.3721924 | 1120.53149 |
| 67010           | Rbm7              | RNA binding motif protein 7                                          | 221.795654 | 317.864441 | 1116.4939  |
| 18719           | Pip5k1b           | phosphatidylinositol-4-phosphate 5-kinase class I beta               | 50         | 50         | 1114.28711 |
| 71878           | Fam83d            | family with sequence similarity 83, domain 2                         | 50         | 54.0889053 | 1113.23535 |
| 319572          | C730027H18Rik     | RIKEN cDNA C730027H18                                                | 150.913879 | 198.204788 | 1111.91577 |
| 216001          | Micul1            | mitochondrial calcium uniporter-like 1                               | 513.506714 | 519.77301  | 1108.29565 |
| 19047           | Ppp1cc            | protein phosphatase 1, cytosolic                                     | 331.924377 | 468.056549 | 1107.54468 |
| 67136           | Kbtbd4            | kelch repeat and BTB (POU) domain containing 4                       | 221.038406 | 320.896179 | 1106.35498 |
| 216616          | Efemp1            | epidermal growth factor receptor signaling pathway 1                 | 58.0703659 | 64.437561  | 1105.30164 |
| 18176           | Nras              | neuroblastoma ras oncogene                                           | 393.999573 | 507.152283 | 1102.3667  |
| 15376           | Foxa2             | forkhead box A2                                                      | 376.22168  | 317.708832 | 1101.67493 |
| 237175          | Gpr64             | G protein-coupled receptor 64                                        | 367.758911 | 278.314606 | 1100.36523 |
| 67057           | Yaf2              | YY1 associated factor 2                                              | 316.896637 | 424.507324 | 1095.64575 |
| 12442           | Ccnb2             | cyclin B2                                                            | 50         | 50         | 1092.6156  |
| 66714           | 4921524J17Rik     | RIKEN cDNA 4921524J17                                                | 206.254669 | 261.318176 | 1092.42993 |
| 10085993164113  | Gm20604Imoap1     | predicted gene 20604Imoap1                                           | 213.432678 | 303.147156 | 1092.20312 |
| 69028           | Mitd1             | MIT, microtubule interacting domain 1                                | 232.46048  | 332.533661 | 1089.87305 |
| 67884           | 1810043G02Rik     | RIKEN cDNA 1810043G02                                                | 121.355911 | 166.338272 | 1089.82031 |
| 74167           | Nudt9             | nudix (nucleoside diphosphate-linked moiety X) motif 9               | 444.204407 | 541.343201 | 1083.92603 |
| 78733           | Troap             | trophinin associated protein                                         | 50         | 65.9470673 | 1083.08301 |
| 70120           | Yars2             | tyrosyl-tRNA synthetase 2                                            | 287.866211 | 347.877686 | 1079.16541 |
| 19155           | Npepps            | aminopeptidase puromycin                                             | 386.268677 | 346.255005 | 1078.29944 |
| 108096          | Slco1a5           | solute carrier organic anion transporter family 1, member 5          | 50         | 50         | 1077.13599 |
| 66821           | Bcs1l             | BCS1-like (yeast)                                                    | 316.174255 | 393.91687  | 1075.40405 |
| 59048           | C1galt1c1         | C1GALT1-specific chaperone                                           | 232.664825 | 279.1521   | 1071.78223 |
| 717011100505160 | Pnpt1LOC100505160 | polyribonucleotide nucleoside transferase 1                          | 348.227356 | 455.962128 | 1069.36987 |
| 66929           | Asf1b             | ASF1 anti-silencing factor 1B                                        | 50         | 50         | 1062.59131 |
| 16434           | Itpa              | inosine triphosphatase (nucleoside diphosphate) 1                    | 149.942764 | 208.796783 | 1060.82983 |
| 12028           | Bax               | BCL2-associated X protein                                            | 234.488251 | 295.278503 | 1059.10437 |
| 15223           | Foxj1             | forkhead box J1                                                      | 109.925919 | 115.573959 | 1056.54578 |
| 74326           | Hnmp1r            | heterogeneous nuclear ribonucleoprotein M1                           | 291.08847  | 431.064514 | 1054.58215 |
| 15288           | Hmbs              | hydroxymethylbilane synthase                                         | 412.618652 | 369.184753 | 1051.00635 |
| 24061           | Smc1a             | structural maintenance of chromosomes 1, A                           | 191.854309 | 244.311859 | 1050.28992 |
| 15939           | Ier5              | immediate early response 5                                           | 50         | 62.8502541 | 1050.08936 |
| 216825          | Usp22             | ubiquitin specific peptidase 22                                      | 347.834473 | 515.757996 | 1048.66309 |
| 19170           | Psmbl1            | proteasome (prosome, multicatalytic endopeptidase complex) subunit 1 | 328.576965 | 384.98999  | 1047.97119 |
| 69716           | Trip13            | thyroid hormone receptor interaction 13                              | 50         | 50         | 1046.15869 |
| 140494          | Atp6v0a4          | ATPase, H+ transporting, vacuolar, class 6, subunit 4                | 50         | 58.3641815 | 1040.80322 |
| 66902           | Mtap              | methylthioadenosine phosphorylation 1                                | 208.152542 | 252.378586 | 1035.27527 |
| 59045           | Stard3            | START domain containing 3                                            | 258.143494 | 353.697815 | 1033.78162 |
| 54352           | Irx5              | Iroquois related homeobox 5                                          | 50         | 54.9363213 | 1025.93335 |
| 67453           | Slc25a46          | solute carrier family 25, member 46                                  | 454.032776 | 500.040497 | 1022.21301 |
| 28010           | Miip              | migration and invasion 1                                             | 349.428162 | 484.523865 | 1021.71832 |
| 72297           | B3gnt3            | UDP-GlcNAc:betaGal beta-N-acetylglucosaminyltransferase 3            | 50         | 50         | 1020.46289 |
| 234549          | Heatr3            | HEAT repeat containing protein 3                                     | 359.235931 | 333.835205 | 1018.78345 |
| 16571           | Kif4              | kinesin family member 4                                              | 50         | 74.0590668 | 1015.31287 |
| 12236           | Bub1b             | budding uninhibited by benzylidene 1                                 | 50         | 51.2877655 | 1011.43146 |

|        |               |                            |            |            |            |
|--------|---------------|----------------------------|------------|------------|------------|
| 230596 | Prpf38a       | PRP38 pre-mRNA proce       | 308.13446  | 307.62616  | 1010.97632 |
| 67204  | Eif2s2        | eukaryotic translation ini | 234.732208 | 178.871262 | 1010.70837 |
| 16661  | Krt10         | keratin 10                 | 277.510315 | 211.916229 | 1008.84827 |
| 22137  | Ttk           | Ttk protein kinase         | 50         | 50         | 1003.43689 |
| 76131  | Depdc1a       | DEP domain containing      | 50         | 50         | 994.129456 |
| 381633 | Gm1673        | predicted gene 1673        | 50         | 50         | 993.805725 |
| 67513  | 2610002J02Rik | RIKEN cDNA 2610002J        | 370.184326 | 472.198853 | 991.153503 |
| 24059  | Slco2a1       | solute carrier organic ani | 435.009705 | 450.430603 | 988.491455 |
| 68842  | Tulp4         | tubby like protein 4       | 464.189026 | 414.860352 | 987.740417 |
| 68014  | Zwilch        | Zwilch, kinetochore asso   | 50         | 50         | 985.46283  |
| 67728  | Dph2          | DPH2 homolog (S. cerev     | 170.066833 | 226.078979 | 985.084839 |
| 70454  | Cenpl         | centromere protein L       | 122.87516  | 179.90683  | 978.957153 |
| 18642  | Pfkm          | phosphofructokinase, mu    | 407.821716 | 399.207886 | 976.85376  |
| 66398  | Commd5        | COMM domain containi       | 397.247192 | 376.99823  | 975.85791  |
| 218210 | Nup153        | nucleoporin 153            | 250.955994 | 261.473816 | 973.085754 |
| 114663 | Impa2         | inositol (myo)-1(or 4)-m   | 170.454956 | 146.741608 | 968.453369 |
| 242362 | Manea         | mannosidase, endo-alpha    | 289.559723 | 335.389984 | 966.905396 |
| 12181  | Bop1          | block of proliferation 1   | 165.792664 | 231.77887  | 966.070679 |
| 102580 | Alg9          | asparagine-linked glycos   | 264.773376 | 322.17511  | 960.215637 |
| 20873  | Plk4          | polo-like kinase 4 (Dros   | 50         | 50         | 957.116455 |
| 14200  | Fhl2          | four and a half LIM dom    | 50         | 50         | 950.80957  |
| 75678  | Ippk          | inositol 1,3,4,5,6-pentaki | 247.339264 | 241.611176 | 941.14386  |
| 69871  | Ppp1r35       | protein phosphatase 1, re  | 351.943848 | 437.466125 | 937.584534 |
| 12544  | Cdc45         | cell division cycle 45 ho  | 50         | 52.5114975 | 935.939575 |
| 83701  | Srt           | serrate RNA effector mo    | 127.293488 | 190.014984 | 934.79425  |
| 80509  | Med8          | mediator of RNA polym      | 299.601959 | 252.41394  | 931.987549 |
| 229937 | Znhit6        | zinc finger, HIT type 6    | 352.018311 | 450.385315 | 929.098694 |
| 72486  | Rnf219        | ring finger protein 219    | 227.828278 | 153.298828 | 926.51709  |
| 217578 | Baz1a         | bromodomain adjacent to    | 234.28389  | 345.121826 | 919.779663 |
| 234388 | Ccdc124       | coiled-coil domain conta   | 340.665955 | 438.21875  | 911.484497 |
| 56454  | Aldh18a1      | aldehyde dehydrogenase     | 50         | 50         | 910.797607 |
| 216705 | Clint1        | clathrin interactor 1      | 375.683075 | 380.682159 | 907.946472 |
| 192174 | Rwdd4a        | RWD domain containing      | 234.423294 | 243.130569 | 903.356812 |
| 16351  | Ipp           | IAP promoted placental     | 298.127075 | 413.925232 | 902.717651 |
| 22218  | Sumo1         | SMT3 suppressor of mif     | 137.788803 | 197.146576 | 899.578979 |
| 67466  | Pdcl          | phosducin-like             | 209.39772  | 200.266037 | 898.68335  |
| 109115 | Supt3h        | suppressor of Ty 3 homo    | 245.720215 | 343.755188 | 895.782959 |
| 74098  | 0610037L13Rik | RIKEN cDNA 0610037L        | 372.207336 | 426.101685 | 893.212891 |
| 107368 | Pdzd8         | PDZ domain containing      | 200.695709 | 288.269958 | 891.144043 |
| 217198 | Plekhh3       | pleckstrin homology dom    | 215.130936 | 291.113556 | 889.213196 |
| 68080  | Gpn3          | GPN-loop GTPase 3          | 101.98909  | 122.315094 | 881.908875 |
| 11752  | Anxa8         | annexin A8                 | 50         | 50         | 875.680908 |
| 67770  | 5830433M19Rik | RIKEN cDNA 5830433M        | 281.375763 | 257.559265 | 875.47052  |
| 75533  | Nme5          | non-metastatic cells 5, pr | 50         | 50         | 871.291687 |
| 20297  | Ccl20         | chemokine (C-C motif) l    | 50         | 50         | 869.29187  |
| 236900 | Pdk3          | pyruvate dehydrogenase     | 50         | 50         | 868.494873 |
| 319801 | 9630033F20Rik | RIKEN cDNA 9630033F        | 212.949493 | 233.87265  | 867.02417  |
| 67242  | Gemin6        | gem (nuclear organelle)    | 52.4813156 | 59.0913467 | 864.217407 |
| 102323 | Dcun1d2       | DCN1, defective in culli   | 114.900299 | 135.046127 | 859.981079 |
| 12054  | Bcl7b         | B cell CLL/lymphoma 7      | 272.060669 | 403.375671 | 856.845703 |
| 232983 | Cxcl17        | chemokine (C-X-C motif     | 50         | 50         | 855.205688 |
| 58246  | Slc35b4       | solute carrier family 35,  | 319.112946 | 332.80954  | 854.096558 |
| 72151  | Rfc5          | replication factor C (acti | 136.722626 | 172.512115 | 853.062866 |
| 72201  | Otud6b        | OTU domain containing      | 367.345428 | 313.732056 | 850.67688  |
| 269582 | Clspn         | claspin homolog (Xenop     | 50         | 50         | 848.096924 |
| 68436  | Rpl34         | ribosomal protein L34      | 210.498749 | 193.420212 | 847.911255 |
| 16341  | Eif3e         | eukaryotic translation ini | 280.997131 | 349.763519 | 845.510437 |
| 217038 | Mrm1          | mitochondrial rRNA met     | 257.869446 | 340.768738 | 840.639771 |
| 54369  | Nme6          | non-metastatic cells 6, pr | 152.288971 | 162.040375 | 839.800049 |
| 22110  | Tsyp11        | testis-specific protein, Y | 221.0289   | 247.067734 | 833.302551 |
| 66067  | Gtpbp8        | GTP-binding protein 8 (r   | 137.858505 | 201.311523 | 830.191895 |

|                 |               |                              |            |            |            |
|-----------------|---------------|------------------------------|------------|------------|------------|
| 107371          | Exoc6         | exocyst complex compon       | 118.940002 | 163.241455 | 829.227295 |
| 74035           | Nol9          | nucleolar protein 9          | 191.545395 | 211.71817  | 823.250732 |
| 11692           | Gfer          | growth factor, erv1 (S. ce   | 381.49707  | 317.026947 | 821.117676 |
| 320685          | Dctd          | dCMP deaminase               | 50         | 50         | 818.897644 |
| 75533           | Nme5          | non-metastatic cells 5, pr   | 50         | 50         | 818.212402 |
| 75939           | 4930579G24Rik | RIKEN cDNA 4930579G24        | 50         | 50         | 815.851013 |
| 70427           | Mier2         | mesoderm induction earl      | 289.181091 | 383.899231 | 814.137085 |
| 13144           | Dapk3         | death-associated protein     | 149.459579 | 211.520111 | 813.612915 |
| 109093          | Rars2         | arginyl-tRNA synthetase      | 303.058655 | 312.716309 | 811.415833 |
| 20706           | Serpinb9b     | serine (or cysteine) pepti   | 50         | 50         | 807.950195 |
| 12581           | Cdkn2d        | cyclin-dependent kinase      | 50         | 50         | 807.741455 |
| 67695           | Ost4          | oligosaccharyltransferase    | 115.278931 | 129.050552 | 807.590332 |
| 106522          | Pkdcc         | protein kinase domain co     | 268.573853 | 228.406189 | 805.330811 |
| 27221           | Chaf1a        | chromatin assembly facto     | 50         | 50         | 803.00885  |
| 73162           | Otud3         | OTU domain containing        | 264.529388 | 318.260559 | 801.741943 |
| 66336           | Cenpp         | centromere protein P         | 50         | 69.540451  | 800.930176 |
| 22230           | Ufd11         | ubiquitin fusion degradat    | 263.711975 | 327.265259 | 798.871094 |
| 19358           | Rad23a        | RAD23a homolog (S. ce        | 265.739746 | 379.179749 | 797.883545 |
| 22213           | Ube2g2        | ubiquitin-conjugating en     | 74.4383011 | 88.8513489 | 795.684814 |
| 381802          | Tsen2         | tRNA splicing endonucle      | 160.503021 | 229.354065 | 794.085938 |
| 110173          | Manba         | mannosidase, beta A, lys     | 210.250015 | 306.113831 | 792.75647  |
| 76890           | Memo1         | mediator of cell motility    | 175.630539 | 237.985229 | 790.779663 |
| 77134           | Hnrnpa0       | heterogeneous nuclear ri     | 50         | 50         | 786.16864  |
| 14235           | Foxm1         | forkhead box M1              | 50         | 50         | 783.733276 |
| 68550           | 1110002N22Rik | RIKEN cDNA 1110002N22        | 361.308044 | 341.077148 | 775.106079 |
| 19076           | Prim2         | DNA primase, p58 subun       | 50         | 73.5851288 | 772.251831 |
| 107753          | Lgals2        | lectin, galactose-binding    | 50         | 50         | 770.84021  |
| 80385           | Tusc2         | tumor suppressor candid      | 308.587524 | 251.664154 | 770.212463 |
| 107829          | Thoc5         | THO complex 5                | 196.4263   | 240.189377 | 769.049072 |
| 13367           | Diap1         | diaphanous homolog 1 (D      | 319.974731 | 347.137787 | 766.787903 |
| 66401           | Nudt2         | nudix (nucleoside diphos     | 108.992828 | 119.591751 | 763.963135 |
| 234729          | Vac14         | Vac14 homolog (S. cerev      | 189.089874 | 247.947693 | 762.697815 |
| 78634           | Spaca7        | sperm acrosome associat      | 50         | 50         | 761.434143 |
| 103710          | Slc35e4       | solute carrier family 35,    | 50         | 50         | 760.824463 |
| 15205           | Hes1          | hairy and enhancer of sp     | 194.857956 | 270.546387 | 759.136841 |
| 268882          | Fbxo45        | F-box protein 45             | 287.80603  | 336.194946 | 753.52832  |
| 17345           | Mki67         | antigen identified by mo     | 50         | 69.9040375 | 753.21936  |
| 77116           | Mtmt2         | myotubularin related pro     | 97.9794846 | 119.977974 | 751.301697 |
| 52552           | Parp8         | poly (ADP-ribose) polyn      | 50         | 61.7694092 | 749.522095 |
| 56368           | Cyb561d2      | cytochrome b-561 domai       | 188.163132 | 268.196533 | 748.103882 |
| 66855           | Tcf25         | transcription factor 25 (b   | 295.810974 | 270.413391 | 747.831116 |
| 73569           | Vgll3         | vestigial like 3 (Drosoph    | 50         | 50         | 745.813171 |
| 13684           | Eif4e         | eukaryotic translation ini   | 130.536346 | 173.515137 | 745.098389 |
| 227358          | Fam132b       | family with sequence sin     | 50         | 50         | 744.482178 |
| 69902           | Mrto4         | MRT4, mRNA turnover          | 281.280701 | 293.713806 | 738.780029 |
| 74442           | Sgms2         | sphingomyelin synthase       | 287.013916 | 307.304993 | 736.420288 |
| 234344 10003906 | Naf1 Gm2027   | nuclear assembly factor      | 182.843384 | 253.261368 | 736.250977 |
| 80385           | Tusc2         | tumor suppressor candid      | 329.936188 | 243.143311 | 734.670166 |
| 74253           | Klrg2         | killer cell lectin-like rece | 50         | 50         | 733.286499 |
| 83945           | Dnaja3        | DnaJ (Hsp40) homolog,        | 302.819458 | 230.522614 | 732.931641 |
| 237459          | Cdk17         | cyclin-dependent kinase      | 272.478882 | 362.5271   | 732.862549 |
| 18005           | Nek2          | NIMA (never in mitosis       | 50         | 50         | 729.811035 |
| 73212           | 3110082I17Rik | RIKEN cDNA 3110082I17        | 50         | 50         | 727.705994 |
| 231440          | Parm1         | prostate androgen-regula     | 50         | 50         | 727.089722 |
| 59002           | Wdr8          | WD repeat domain 8           | 219.409851 | 201.931152 | 726.711792 |
| 55988           | Snx12         | sorting nexin 12             | 179.839752 | 232.08728  | 726.439026 |
| 243958          | Siglecg       | sialic acid binding Ig-like  | 50         | 50         | 723.183716 |
| 66225           | Llph          | LLP homolog, long-term       | 252.375427 | 360.771423 | 723.078552 |
| 69549           | 2310009B15Rik | RIKEN cDNA 2310009B15        | 299.367493 | 294.275452 | 721.113159 |
| 67531           | 5730408K05Rik | RIKEN cDNA 5730408K05        | 179.077759 | 202.116486 | 719.857788 |
| 237211          | Fancc         | Fanconi anemia, comple       | 50         | 50         | 716.886719 |



|        |               |                            |            |            |            |
|--------|---------------|----------------------------|------------|------------|------------|
| 69263  | Rfc3          | replication factor C (acti | 63.1112823 | 87.7931442 | 714.213135 |
| 20133  | Rrm1          | ribonucleotide reductase   | 50         | 50         | 714.132568 |
| 68187  | Fam135a       | family with sequence sin   | 174.83844  | 231.061615 | 711.823792 |
| 15944  | Irgm1         | immunity-related GTPas     | 324.532471 | 338.795197 | 706.760864 |
| 13590  | Lefty1        | left right determination f | 50         | 72.5495605 | 705.551392 |
| 74340  | Aheyl2        | S-adenosylhomocysteine     | 264.355133 | 347.74472  | 705.208008 |
| 71735  | Lrwd1         | leucine-rich repeats and   | 98.5371246 | 133.614441 | 705.122559 |
| 71517  | 9030624J02Rik | RIKEN cDNA 9030624J        | 203.559952 | 290.36377  | 704.696899 |
| 20348  | Sema3c        | sema domain, immunogl      | 50         | 50         | 704.272949 |
| 72170  | Chchd4        | coiled-coil-helix-coiled-c | 259.806915 | 332.501129 | 704.222046 |
| 116748 | Lsm10         | U7 snRNP-specific Sm-l     | 138.102463 | 124.035385 | 700.186157 |
| 71514  | Sfpq          | splicing factor proline/gl | 168.861267 | 225.595154 | 699.721069 |
| 229927 | Clca4         | chloride channel calcium   | 50         | 50         | 699.088379 |
| 24105  | Rbck1         | RanBP-type and C3HC4       | 111.826958 | 161.092499 | 697.478027 |
| 76843  | Dtl           | denticleless homolog (D)   | 50         | 50         | 697.157593 |
| 98386  | Lbr           | lamin B receptor           | 50         | 50         | 697.123047 |
| 226245 | 9930023K05Rik | RIKEN cDNA 9930023K        | 50         | 50         | 693.414185 |
| 213556 | Plekhh2       | pleckstrin homology dom    | 117.903946 | 139.356781 | 693.146362 |
| 69216  | Ccdc23        | coiled-coil domain conta   | 272.260284 | 343.511902 | 692.571228 |
| 214791 | Sertad4       | SERTA domain containi      | 50         | 50         | 691.274658 |
| 114863 | Prosc         | proline synthetase co-tra  | 153.325027 | 155.162003 | 690.9953   |
| 228421 | Kif18a        | kinesin family member l    | 50         | 50         | 687.565796 |
| 56031  | Ppie          | peptidylprolyl isomerase   | 129.196106 | 159.61554  | 687.565796 |
| 27784  | Commd8        | COMM domain containi       | 179.461121 | 185.386032 | 684.136353 |
| 208084 | Pif1          | PIF1 5'-to-3' DNA helica   | 50         | 50         | 684.065674 |
| 72065  | Rap2c         | RAP2C, member of RAS       | 260.838196 | 310.830475 | 682.450317 |
| 17967  | Ncam1         | neural cell adhesion mol   | 50         | 50         | 681.096313 |
| 26909  | Exo1          | exonuclease 1              | 50         | 50         | 679.380676 |
| 67832  | Brix1         | BRX1, biogenesis of ribo   | 134.058014 | 156.165039 | 677.167236 |
| 22722  | Zfp64         | zinc finger protein 64     | 113.311356 | 148.780212 | 675.172241 |
| 65964  | B230120H23Rik | RIKEN cDNA B230120H        | 138.17218  | 203.275146 | 675.090088 |
| 24058  | Sigirr        | single immunoglobulin a    | 184.01886  | 138.860214 | 674.207642 |
| 77022  | 2700099C18Rik | NDC80 homolog, kineto      | 50         | 65.2199097 | 671.944885 |
| 67674  | Trmt112       | tRNA methyltransferase     | 150.809326 | 200.210861 | 671.563599 |
| 66980  | Zdhhc6        | zinc finger, DHHC doma     | 186.63913  | 232.054749 | 671.241577 |
| 68642  | Tmem216       | transmembrane protein 2    | 228.455627 | 188.603104 | 670.888306 |
| 73998  | Herc3         | hect domain and RLD 3      | 228.102341 | 314.819977 | 668.439819 |
| 66355  | Gmpr          | guanosine monophospha      | 50         | 50         | 664.911743 |
| 320213 | Senp5         | SUMO/sentrin specific p    | 294.461243 | 301.053345 | 663.342346 |
| 108121 | U2af1         | U2 small nuclear ribonuc   | 115.423088 | 168.30191  | 663.273315 |
| 98376  | Gorab         | golgin, RAB6-interacting   | 109.78968  | 118.997574 | 661.842041 |
| 105351 | AW209491      | expressed sequence AW      | 251.752838 | 325.502502 | 658.261353 |
| 71707  | Ubiad1        | UbiA prenyltransferase d   | 158.544952 | 200.554657 | 657.00592  |
| 66278  | 1810013D10Rik | RIKEN cDNA 1810013D        | 323.909912 | 277.123413 | 656.476807 |
| 16497  | Kcnab1        | potassium voltage-gated    | 50         | 50         | 655.732422 |
| 67674  | Trmt112       | tRNA methyltransferase     | 183.226776 | 174.638428 | 651.808228 |
| 20729  | Spin1         | spindlin 1                 | 50         | 50         | 646.681274 |
| 100336 | Ppp1r8        | protein phosphatase 1, re  | 206.59845  | 199.626587 | 645.414307 |
| 215999 | Ccdc109a      | coiled-coil domain conta   | 50         | 51.5636368 | 643.095581 |
| 19881  | Rom1          | rod outer segment memb     | 201.278702 | 161.2453   | 642.275635 |
| 108961 | E2f8          | E2F transcription factor   | 135.407745 | 169.954285 | 641.753052 |
| 241846 | Lsm14b        | LSM14 homolog B (SCI       | 80.1018066 | 96.148468  | 641.613403 |
| 68051  | Nutf2         | nuclear transport factor 2 | 139.412598 | 187.457184 | 638.699829 |
| 229782 | Slc35a3       | solute carrier family 35 ( | 314.585327 | 306.434937 | 638.560181 |
| 57434  | Xrcc2         | X-ray repair complement    | 92.7342072 | 111.226532 | 638.11322  |
| 233726 | Ipo7          | importin 7                 | 156.707291 | 168.675385 | 636.356567 |
| 107746 | Ragef1        | Rap guanine nucleotide e   | 212.431458 | 312.39801  | 636.008179 |
| 100087 | Kti12         | KTI12 homolog, chroma      | 253.520813 | 203.285034 | 635.840576 |
| 237211 | Fanb          | Fanconi anemia, comple     | 50         | 50         | 631.195068 |
| 231876 | Lmtk2         | lemur tyrosine kinase 2    | 178.220703 | 244.256683 | 630.695496 |
| 328801 | Zfp414        | zinc finger protein 414    | 230.453308 | 284.686493 | 630.370117 |

|                 |                  |                                                          |            |            |            |
|-----------------|------------------|----------------------------------------------------------|------------|------------|------------|
| 22158           | Tulp3            | tubby-like protein 3                                     | 50         | 71.2154846 | 628.631592 |
| 19012           | Ppap2a           | phosphatidic acid phospholipase 2A                       | 50         | 50         | 626.615234 |
| 68449           | Tbc1d10b         | TBC1 domain family, member 10B                           | 222.752502 | 283.881531 | 621.463623 |
| 230376          | Haus6            | HAUS augmin-like complex subunit 6                       | 57.1737061 | 51.9922943 | 619.935364 |
| 15247           | Hiat1            | hippocampus abundant gamma-tubulin interacting protein 1 | 170.171387 | 242.922607 | 619.626465 |
| 234686          | Fhod1            | formin homology 2 domain containing protein 1            | 194.33992  | 262.376404 | 617.697266 |
| 107823          | Whsc1            | Wolf-Hirschhorn syndrome critical region 1               | 212.440964 | 300.669983 | 611.211243 |
| 14048           | Eya1             | eyes absent 1 homolog (Drosophila)                       | 50         | 50         | 610.249939 |
| 330122          | Cxcl3            | chemokine (C-X-C motif) subfamily 3                      | 50         | 50         | 607.482666 |
| 56217           | Mpp5             | membrane protein, palmitoylated 5                        | 50         | 50         | 606.495056 |
| 67052           | Ndc80            | NDC80 homolog, kinetochore-associated protein            | 50         | 50         | 606.19928  |
| 214580          | Pstk             | phosphoseryl-tRNA kinase                                 | 120.658859 | 173.690567 | 605.656982 |
| 23825           | Banf1            | barrier to autointegration factor 1                      | 50         | 50         | 603.519104 |
| 67573           | Loxl4            | lysyl oxidase-like 4                                     | 50         | 50         | 600.543091 |
| 433813          | Pusl1            | pseudouridylate synthase 1                               | 125.08194  | 178.916534 | 600.472473 |
| 212307          | Mapre2           | microtubule-associated protein 2                         | 192.551361 | 236.297485 | 598.949158 |
| 78895           | Pus7l            | pseudouridylate synthase 7L                              | 128.503815 | 175.586288 | 598.24585  |
| 272551          | Gins2            | GINS complex subunit 2                                   | 50         | 50         | 598.124268 |
| 69770           | 1600002K03Rik    | RIKEN cDNA 1600002K03                                    | 106.990402 | 160.066833 | 597.979614 |
| 109065          | 1110034A24Rik    | RIKEN cDNA 1110034A24                                    | 78.5429535 | 75.3705063 | 595.1828   |
| 76832           | Hyls1            | hydroletharus syndrome 1                                 | 99.8076477 | 140.028763 | 594.165649 |
| 66190           | Acer3            | alkaline ceramidase 3                                    | 204.252243 | 274.974457 | 594.025879 |
| 70454           | Cenpl            | centromere protein L                                     | 128.264603 | 164.156784 | 592.87561  |
| 20346           | Sema3a           | sema domain, immunoglobulin-like 3A                      | 50         | 50         | 590.944763 |
| 66664           | Tmem41a          | transmembrane protein 41A                                | 205.278809 | 255.234894 | 590.729492 |
| 12545           | Cdc7             | cell division cycle 7 (S. pombe)                         | 50         | 50         | 590.660522 |
| 432508          | Cpsf6            | cleavage and polyadenylation specificity factor 6        | 63.2807922 | 73.2993622 | 589.166748 |
| 218581          | Depdc1b          | DEP domain containing protein 1B                         | 50         | 50         | 588.805298 |
| 18617           | Rhox5            | reproductive homeobox 5                                  | 50         | 50         | 587.235962 |
| 66973           | Mrps18b          | mitochondrial ribosomal protein S18B                     | 88.24617   | 100.491653 | 586.672241 |
| 229672          | Bcl2l15          | BCL2-like 15                                             | 50         | 50         | 584.835083 |
| 56470           | Rgs19            | regulator of G-protein signaling 19                      | 50         | 50         | 584.835083 |
| 22422           | Wnt7b            | wingless-related MMTV integrin 7B                        | 50.9620705 | 52.9627914 | 584.411133 |
| 105785          | Kdelr3           | KDEL (Lys-Asp-Glu-Leu) receptor 3                        | 50         | 53.4692612 | 583.242798 |
| 212377          | Mms22l           | MMS22-like, DNA replication fork-associated protein      | 75.574173  | 110.554535 | 581.504211 |
| 20419           | Shcbp1           | Shc SH2-domain binding protein 1                         | 50         | 50         | 578.487183 |
| 11781           | Ap4m1            | adaptor-related protein complex 4 member 1               | 116.210434 | 160.122009 | 577.783813 |
| 70784           | Rasl12           | RAS-like, family 12                                      | 50         | 50         | 576.569458 |
| 544717110050327 | 1190007I07Rik1Gr | RIKEN cDNA 1190007I07                                    | 207.769165 | 220.833206 | 575.813599 |
| 108899          | 2700081O15Rik    | RIKEN cDNA 2700081O15                                    | 121.216499 | 168.532501 | 575.701782 |
| 272396          | Tarsl2           | threonyl-tRNA synthetase 2                               | 263.358673 | 249.778336 | 575.121704 |
| 50760           | Fbxo17           | F-box protein 17                                         | 50         | 55.5305023 | 574.807861 |
| 381318          | Nsl1             | NSL1, MIND kinetochore-associated protein 1              | 50         | 50         | 574.516968 |
| 108689          | Obfc1            | oligonucleotide/oligosaccharide binding factor 1         | 50         | 50         | 573.83667  |
| 70355           | Gprc5c           | G protein-coupled receptor class C group 5C              | 56.585968  | 70.5434875 | 571.76123  |
| 16571           | Kif4             | kinesin family member 4                                  | 50         | 50         | 571.628174 |
| 72614           | Pih1d2           | PIH1 domain containing protein 2                         | 50         | 50         | 569.749878 |
| 225997          | Trpm6            | transient receptor potential melastatin 6                | 127.811516 | 140.480072 | 568.668579 |
| 22036           | Traip            | TRAF-interacting protein                                 | 50         | 68.9561768 | 567.942261 |
| 329369          | 5730588L14Rik    | RIKEN cDNA 5730588L14                                    | 50         | 53.9983635 | 567.855225 |
| 12224           | Klf5             | Kruppel-like factor 5                                    | 50         | 50         | 567.727051 |
| 71971           | Zswim1           | zinc finger, SWIM domain containing protein 1            | 80.1319122 | 115.592346 | 566.675293 |
| 23797           | Akt3             | thymoma viral proto-oncogene 3                           | 50         | 67.7324448 | 564.709961 |
| 237459          | Cdk17            | cyclin-dependent kinase 17                               | 157.952469 | 190.080063 | 564.59491  |
| 223828          | Pphln1           | periphilin 1                                             | 50         | 50         | 563.896545 |
| 26885           | Casp8ap2         | caspase 8 associated protein 2                           | 140.000336 | 156.385742 | 561.66333  |
| 226043          | Cbwd1            | COBW domain containing protein 1                         | 50         | 67.4565735 | 561.23938  |
| 13481           | Dpm2             | dolichol-phosphate (beta-D-glucosyl) transferase 2       | 138.959518 | 201.720367 | 560.320801 |
| 241035          | Pkhd1            | polycystic kidney and hearing loss 1                     | 168.378082 | 229.45166  | 559.757141 |
| 27966           | Rrp9             | RRP9, small subunit (SSB)                                | 50         | 50         | 559.292114 |
| 50883           | Chek2            | checkpoint kinase 2                                      | 50         | 66.586525  | 556.181396 |

|                 |                   |                            |            |            |            |
|-----------------|-------------------|----------------------------|------------|------------|------------|
| 21956           | Tnnt2             | troponin T2, cardiac       | 50         | 50         | 555.961182 |
| 67884           | 1810043G02Rik     | RIKEN cDNA 1810043G02      | 94.7017822 | 132.929718 | 551.75769  |
| 114715          | Spred1            | sprouty protein with EVH1  | 103.364174 | 121.510117 | 551.49646  |
| 80905           | Polh              | polymerase (DNA directed)  | 85.2773895 | 99.245285  | 550.955811 |
| 114863          | Prosc             | proline synthetase co-tran | 104.644211 | 154.775787 | 550.921265 |
| 13836           | Epha2             | Eph receptor A2            | 185.777328 | 174.97937  | 549.613281 |
| 18393           | Orc2              | origin recognition compl   | 50         | 50         | 548.600952 |
| 235169          | Foxred1           | FAD-dependent oxidoreduc   | 167.307159 | 205.787674 | 546.962646 |
| 69962           | 2810422O20Rik     | RIKEN cDNA 2810422O20      | 216.680267 | 203.814148 | 546.177124 |
| 66549           | Aggf1             | angiogenic factor with G   | 195.524902 | 225.221649 | 538.225342 |
| 69257           | Elf2              | E74-like factor 2          | 232.211761 | 258.552429 | 536.527893 |
| 66580           | Esf1              | ESF1, nucleolar pre-rRN    | 110.581772 | 133.744598 | 536.108826 |
| 56401           | Lepre1            | leprecan 1                 | 246.955887 | 238.777496 | 535.783447 |
| 100088          | Rcc1              | regulator of chromosome    | 99.0155487 | 137.38324  | 535.405518 |
| 52679           | E2f7              | E2F transcription factor 7 | 50         | 50         | 534.876404 |
| 12563           | Cdh6              | cadherin 6                 | 50         | 50         | 534.505005 |
| 30938           | Fgd3              | FYVE, RhoGEF and PH        | 50         | 50         | 534.085938 |
| 51812           | Mcrs1             | microspherule protein 1    | 50         | 51.6612473 | 532.638245 |
| 66748           | 4933404M02Rik     | RIKEN cDNA 4933404M02      | 50         | 50         | 532.493652 |
| 15476           | Hs3st1            | heparan sulfate (glucosar  | 50         | 50         | 531.934937 |
| 208624          | Alg3              | asparagine-linked glycos   | 176.562042 | 264.207031 | 530.679443 |
| 215707          | Ccdc92            | coiled-coil domain conta   | 50         | 50         | 524.586243 |
| 108013          | Celf4             | CUGBP, Elav-like famil     | 50         | 50         | 517.960571 |
| 20017           | Polr1b            | polymerase (RNA) I poly    | 187.505692 | 226.753799 | 517.715698 |
| 110012          | Gm16517           | predicted gene, Gm16517    | 175.491119 | 246.726776 | 516.309082 |
| 233875          | Ino80e            | INO80 complex subunit      | 61.0042992 | 88.3448792 | 514.996094 |
| 22137           | Ttk               | Ttk protein kinase         | 50         | 50         | 514.91394  |
| 70466           | Ckap2l            | cytoskeleton associated p  | 50         | 50         | 514.739746 |
| 11920           | Atm               | ataxia telangiectasia mut  | 208.531158 | 254.572815 | 514.251709 |
| 68588           | Cthrc1            | collagen triple helix repe | 50         | 50         | 509.798431 |
| 66129           | 1110018J18Rik     | RIKEN cDNA 1110018J18      | 235.354797 | 238.767578 | 509.001465 |
| 17760           | Mtap6             | microtubule-associated p   | 50         | 50         | 508.845337 |
| 72454           | Ccdc71            | coiled-coil domain conta   | 153.808197 | 200.73996  | 508.276794 |
| 76932           | Arfp2             | ADP-ribosylation factor    | 134.854858 | 196.409515 | 507.979309 |
| 68193           | Rpl24             | ribosomal protein L24      | 50         | 58.925827  | 507.938263 |
| 234814          | Mthfsd            | methenyltetrahydrofolate   | 193.478119 | 224.504395 | 507.560303 |
| 309531100505386 | Schip1 Iqj-schip1 | schwannomin interacting    | 50         | 50         | 506.7995   |
| 269623          | C030048B08Rik     | RIKEN cDNA C030048B08      | 112.066177 | 160.375244 | 505.798737 |
| 225895          | Taf6l             | TAF6-like RNA polymer      | 63.9730911 | 79.1520462 | 502.996948 |
| 207521          | Dtx4              | deltex 4 homolog (Dros     | 177.010376 | 239.053345 | 501.340515 |
| 71116           | Stx18             | syntaxin 18                | 102.367706 | 84.9170227 | 500.591187 |
| 22375           | Wars              | tryptophanyl-tRNA synt     | 50         | 50         | 500.270752 |
| 22268           | Upk1b             | uropalakin 1B              | 53.2433167 | 64.7558746 | 497.881439 |
| 83767           | Wasf1             | WASP family 1              | 96.3255768 | 113.839508 | 497.643188 |
| 66464           | Taf12             | TAF12 RNA polymerase       | 197.034637 | 197.234283 | 497.2948   |
| 65962           | Slc9a3r2          | solute carrier family 9 (s | 74.1246338 | 99.8295593 | 495.59729  |
| 216274          | Cep290            | centrosomal protein 290    | 50         | 73.5525894 | 495.178284 |
| 66949           | Trim59            | tripartite motif-containin | 50         | 50         | 492.312408 |
| 22720           | Zfp62             | zinc finger protein 62     | 172.691849 | 213.448364 | 492.172729 |
| 74246           | Gale              | galactose-4-epimerase, U   | 111.483185 | 161.874847 | 489.923096 |
| 17760           | Mtap6             | microtubule-associated p   | 50         | 50         | 488.795776 |
| 67196           | Ube2t             | ubiquitin-conjugating en   | 50         | 50         | 486.371948 |
| 13732           | Emp3              | epithelial membrane prot   | 50         | 51.4108467 | 484.947266 |
| 30937           | Lmcd1             | LIM and cysteine-rich do   | 50         | 57.8902512 | 483.384521 |
| 77552           | Shisa4            | shisa homolog 4 (Xenop     | 50         | 50         | 479.756165 |
| 218343          | Ttc37             | tetratricopeptide repeat d | 193.034546 | 216.934235 | 477.541016 |
| 54200           | Sult2b1           | sulfotransferase family, c | 50         | 50         | 477.483521 |
| 26379           | Esrra             | estrogen related receptor  | 183.675095 | 231.801514 | 477.227173 |
| 57895           | Ccdc126           | coiled-coil domain conta   | 118.940002 | 145.495239 | 474.021149 |
| 232946          | Bloc1s3           | biogenesis of lysosome-r   | 154.191589 | 176.534149 | 473.582397 |
| 70967           | 4931408A02Rik     | RIKEN cDNA 4931408A02      | 50         | 50         | 473.529816 |

|           |               |                            |            |            |            |
|-----------|---------------|----------------------------|------------|------------|------------|
| 218973    | Wdhd1         | WD repeat and HMG-bo       | 50         | 70.4883118 | 471.421509 |
| 94353     | Hmgn3         | high mobility group nucl   | 50         | 50         | 470.164368 |
| 20355     | Sema4f        | sema domain, immunogl      | 50         | 50         | 469.786438 |
| 68327     | 0610007P22Rik | RIKEN cDNA 0610007P        | 158.300995 | 168.973907 | 469.48407  |
| 232187    | Smyd5         | SET and MYND domain        | 160.921265 | 206.306885 | 468.315735 |
| 70218     | Kif18b        | kinesin family member 1    | 50         | 50         | 466.659302 |
| 234086    | Erich1        | glutamate-rich 1           | 50         | 69.2971191 | 465.472839 |
| 210530    | Leprel1       | leprecan-like 1            | 50         | 50         | 465.362762 |
| 14391     | Gabpb1        | GA repeat binding protei   | 69.0140076 | 85.9851379 | 464.50824  |
| 66440     | Cdc26         | cell division cycle 26     | 148.841751 | 109.551498 | 464.258484 |
| 100039781 | Hrct1         | histidine rich carboxyl te | 50         | 60.7564697 | 464.031708 |
| 105988    | Espl1         | extra spindle poles-like 1 | 50         | 50         | 461.589813 |
| 67706     | Tmem179b      | transmembrane protein 1    | 135.925781 | 163.241455 | 459.589935 |
| 209003    | Rbmx2         | RNA binding motif prote    | 50         | 50         | 458.648346 |
| 100206    | Adprhl2       | ADP-ribosylhydrolase li    | 126.740601 | 125.093597 | 457.793854 |
| 67203     | Nde1          | nuclear distribution gene  | 50         | 50         | 456.67807  |
| 18760     | Prkd1         | protein kinase D1          | 50         | 50         | 455.52121  |
| 13017     | Ctbp2         | C-terminal binding prote   | 50         | 50         | 455.230347 |
| 12448     | Ccne2         | cyclin E2                  | 50         | 50         | 454.323242 |
| 208117    | Aph1b         | anterior pharynx defectiv  | 81.9949265 | 118.027077 | 454.183594 |
| 225651    | Mppe1         | metallophosphoesterase     | 114.865448 | 172.025436 | 453.207458 |
| 26951     | Zw10          | ZW10 homolog (Drosop       | 136.443817 | 148.05304  | 452.568237 |
| 54722     | Dfna5         | deafness, autosomal dom    | 106.75119  | 149.793152 | 452.527161 |
| 20349     | Sema3e        | sema domain, immunogl      | 50         | 50         | 451.143524 |
| 68092     | Ncbp2         | nuclear cap binding prote  | 76.4407272 | 109.463791 | 450.23645  |
| 75317     | 4930547N16Rik | RIKEN cDNA 4930547N        | 50         | 50         | 449.748413 |
| 232313    | Gxylt2        | glucoside xylosyltransfer  | 50         | 50         | 449.446045 |
| 78906     | 9130017N09Rik | RIKEN cDNA 9130017N        | 50         | 50         | 447.71405  |
| 69185     | Dtwd1         | DTW domain containing      | 160.403229 | 171.707123 | 446.504578 |
| 624086    | A230045G11Rik | RIKEN cDNA A230045         | 50         | 60.8767242 | 444.568817 |
| 66374     | 2310011J03Rik | RIKEN cDNA 2310011J        | 125.774246 | 170.626282 | 443.045502 |
| 623474    | Rad54b        | RAD54 homolog B (S. c      | 50         | 70.1799088 | 442.587036 |
| 241627    | Wdr76         | WD repeat domain 76        | 63.0067291 | 91.9156342 | 442.02832  |
| 75572     | Acyp2         | acylphosphatase 2, musc    | 148.184296 | 105.120605 | 441.837708 |
| 215707    | Ccdc92        | coiled-coil domain conta   | 50         | 50         | 441.278992 |
| 57785     | Rangrf        | RAN guanine nucleotide     | 50         | 68.3167191 | 440.546082 |
| 72672     | Zfp518a       | zinc finger protein 518A   | 152.672333 | 156.55127  | 437.389343 |
| 102920    | Cenpi         | centromere protein I       | 50         | 50         | 437.366333 |
| 218271    | B4galt7       | xylosylprotein beta1,4-ga  | 50         | 72.6047287 | 429.007019 |
| 67564     | Tmem35        | transmembrane protein 3    | 50         | 52.345974  | 428.541992 |
| 13593     | Ebf3          | early B cell factor 3      | 50         | 50         | 428.408875 |
| 67870     | Enoph1        | enolase-phosphatase 1      | 50         | 50         | 427.989868 |
| 19362     | Rad51ap1      | RAD51 associated protei    | 50         | 50         | 427.380188 |
| 26934     | Racgap1       | Rac GTPase-activating p    | 50         | 50         | 426.693298 |
| 228482    | Arhgap11a     | Rho GTPase activating p    | 50         | 50         | 425.815796 |
| 219072    | Haus4         | HAUS augmin-like comp      | 154.156738 | 148.747681 | 425.391846 |
| 236899    | Pcyt1b        | phosphate cytidylyltransf  | 50         | 52.9076157 | 424.001648 |
| 212898    | Dse           | dermatan sulfate epimera   | 110.238007 | 149.838425 | 422.553925 |
| 232157    | Mob1a         | MOB kinase activator 1A    | 50         | 50         | 422.129944 |
| 241308    | Ralgps1       | Ral GEF with PH domai      | 50         | 50         | 421.827576 |
| 240756    | Klhl12        | kelch-like 12 (Drosophil   | 196.869873 | 209.228271 | 421.479218 |
| 232164    | Paip2b        | poly(A) binding protein    | 209.985458 | 195.283401 | 421.101257 |
| 58186     | Rad18         | RAD18 homolog (S. cere     | 81.0285645 | 119.935532 | 421.071655 |
| 74201     | Cep97         | centrosomal protein 97     | 50         | 50         | 419.729126 |
| 100647    | Upk3b         | uropodin 3B                | 50         | 50         | 419.531921 |
| 75623     | 1700029F09Rik | RIKEN cDNA 1700029F        | 50         | 67.566925  | 418.665924 |
| 215708    | Fam73a        | family with sequence sin   | 162.510223 | 180.435944 | 413.282593 |
| 18760     | Prkd1         | protein kinase D1          | 50         | 50         | 412.410004 |
| 18783     | Pla2g4a       | phospholipase A2, group    | 50         | 50         | 412.224304 |
| 207704    | Gtpbp10       | GTP-binding protein 10     | 122.531387 | 142.531403 | 411.282715 |
| 67049     | Pus3          | pseudouridine synthase 3   | 184.36264  | 199.38324  | 410.91626  |

|        |               |                             |            |            |            |
|--------|---------------|-----------------------------|------------|------------|------------|
| 226841 | Vash2         | vasohibin 2                 | 50         | 50         | 409.323944 |
| 69776  | 1600002D24Rik | RIKEN cDNA 1600002D         | 50         | 50         | 408.865479 |
| 226154 | Lzts2         | leucine zipper, putative t  | 50         | 50         | 406.612549 |
| 71874  | 2310007B03Rik | RIKEN cDNA 2310007B         | 50         | 50         | 405.993042 |
| 217219 | Fam171a2      | family with sequence sim    | 50         | 67.5018463 | 404.336609 |
| 74732  | Stx11         | syntaxin 11                 | 50         | 54.5501022 | 404.178864 |
| 76789  | Mzt1          | mitotic spindle organizin   | 122.287422 | 159.021362 | 404.114777 |
| 16975  | Lrp8          | low density lipoprotein r   | 50         | 50         | 403.940582 |
| 224171 | C330027C09Rik | RIKEN cDNA C330027C         | 50         | 50         | 403.033508 |
| 102124 | E130303B06Rik | RIKEN cDNA E130303B         | 50         | 50         | 402.28418  |
| 15369  | Hmox2         | heme oxygenase (decycli     | 50         | 51.0217972 | 401.441162 |
| 14573  | Gdnf          | glial cell line derived neu | 50         | 50         | 395.877045 |
| 231872 | Aimp2         | aminoacyl tRNA synthet      | 50         | 50         | 395.104706 |
| 18704  | Pik3c2a       | phosphatidylinositol 3-ki   | 50         | 50         | 394.14505  |
| 269252 | Gtf3c4        | general transcription fact  | 123.881126 | 144.271515 | 393.709595 |
| 52184  | Odf2l         | outer dense fiber of sperm  | 83.6535797 | 109.915085 | 393.709595 |
| 70078  | Nol7          | nucleolar protein 7         | 149.076202 | 176.754852 | 393.656982 |
| 270906 | Prr11         | proline rich 11             | 50         | 50         | 393.256042 |
| 27078  | B9d1          | B9 protein domain 1         | 50         | 61.3506546 | 393.203461 |
| 17151  | Cndbp1        | cyclin D-type binding-pr    | 122.14801  | 117.322556 | 392.726929 |
| 67689  | Aldh3b1       | aldehyde dehydrogenase      | 50         | 58.484436  | 392.511658 |
| 380840 | Lym4          | LYR motif containing 4      | 147.487259 | 188.736084 | 391.308777 |
| 12237  | Bub3          | budding uninhibited by b    | 125.086693 | 138.19812  | 390.919312 |
| 68865  | Arv1          | ARV1 homolog (yeast)        | 68.1870575 | 100.524185 | 389.668762 |
| 76179  | Usp31         | ubiquitin specific peptid   | 116.593811 | 146.917023 | 388.617065 |
| 68559  | Pdrg1         | p53 and DNA damage re       | 87.3146591 | 115.371651 | 388.099457 |
| 379043 | Raet1e        | retinoic acid early transc  | 50         | 50         | 387.838196 |
| 12532  | Cdc25c        | cell division cycle 25 ho   | 50         | 50         | 387.634399 |
| 14697  | Gnb5          | guanine nucleotide bindi    | 50         | 61.1525917 | 385.524445 |
| 319953 | Ttl1          | tubulin tyrosine ligase-li  | 50         | 55.4102516 | 385.396301 |
| 216049 | Zfp365        | zinc finger protein 365     | 50         | 50         | 383.687256 |
| 67838  | Dnajb11       | DnaJ (Hsp40) homolog,       | 101.710274 | 102.530258 | 381.449158 |
| 100210 | Gpn2          | GPN-loop GTPase 2           | 131.886078 | 132.147369 | 380.839478 |
| 13800  | Enah          | enabled homolog (Droso      | 50         | 50         | 379.961975 |
| 232539 | Klhdc5        | kelch domain containing     | 143.651917 | 144.326691 | 379.815735 |
| 26896  | Med14         | mediator complex subun      | 123.806664 | 181.020218 | 379.653046 |
| 13527  | Dtna          | dystrobrevin alpha          | 50         | 50         | 377.879944 |
| 67121  | Mastl         | microtubule associated s    | 50         | 65.4505005 | 377.217712 |
| 14659  | Glrp1         | glutamine repeat protein    | 50         | 50         | 377.013947 |
| 210719 | Mkx           | mohawk homeobox             | 121.181648 | 135.763397 | 375.456116 |
| 75219  | Dusp18        | dual specificity phosphat   | 50         | 50.8463745 | 374.688721 |
| 70134  | 2210011C24Rik | RIKEN cDNA 2210011C         | 50         | 50         | 374.549042 |
| 20210  | Saa3          | serum amyloid A 3           | 50         | 50         | 373.055298 |
| 67979  | Atad1         | ATPase family, AAA do       | 131.402893 | 102.387375 | 372.310913 |
| 64297  | Gprc5b        | G protein-coupled recept    | 50         | 50         | 371.758759 |
| 66607  | Ms4a4d        | membrane-spanning 4-dc      | 50         | 50         | 371.183655 |
| 224170 | Dzip3         | DAZ interacting protein     | 50         | 73.9161758 | 369.735901 |
| 56075  | Pdss1         | prenyl (solanesyl) diphos   | 50         | 69.2971191 | 368.957001 |
| 53886  | Cdk12         | cyclin-dependent kinase-    | 50         | 59.3997574 | 366.741882 |
| 66078  | Tsen34        | tRNA splicing endonucle     | 50         | 50         | 366.66626  |
| 218454 | Lhfp12        | lipoma HMGIC fusion p       | 95.3893204 | 117.741302 | 366.62027  |
| 237211 | Fancb         | Fanconi anemia, comple      | 50         | 50         | 366.184814 |
| 216795 | Wnt9a         | wingless-type MMTV in       | 50         | 50         | 366.091125 |
| 75212  | Rnf121        | ring finger protein 121     | 125.983353 | 121.136627 | 366.068115 |
| 11416  | Slc33a1       | solute carrier family 33 (  | 123.218925 | 116.936325 | 365.823273 |
| 321000 | 4933421E11Rik | RIKEN cDNA 4933421E         | 170.176147 | 175.985229 | 365.305664 |
| 77951  | Cyp20a1       | cytochrome P450, family     | 50         | 50         | 364.579346 |
| 21778  | Tex9          | testis expressed gene 9     | 50         | 50         | 363.736328 |
| 15893  | Ica1          | islet cell autoantigen 1    | 50         | 55.1895561 | 363.573639 |
| 21987  | Tpd5211       | tumor protein D52-like l    | 50         | 50         | 362.707642 |
| 60527  | Fads3         | fatty acid desaturase 3     | 50         | 50         | 361.899139 |

|           |               |                             |            |            |            |
|-----------|---------------|-----------------------------|------------|------------|------------|
| 330695    | Ctxn1         | cortixin 1                  | 50         | 50         | 361.894226 |
| 245670    | Rragb         | Ras-related GTP binding     | 50         | 50         | 361.754547 |
| 72137     | Wdsub1        | WD repeat, SAM and U-       | 89.1079712 | 128.047531 | 361.701965 |
| 72433     | Rab38         | RAB38, member of RAS        | 50         | 50         | 361.614868 |
| 229841    | Cenpe         | centromere protein E        | 50         | 50         | 361.399597 |
| 56513     | Pard6a        | par-6 (partitioning defect  | 74.5032501 | 77.3440399 | 361.358521 |
| 210094    | Igln5         | IgLON family member 5       | 81.7905579 | 82.437027  | 361.213928 |
| 76804     | Kdm4c         | lysine (K)-specific deme    | 115.966469 | 157.531647 | 361.115295 |
| 68277     | 2310057M21Rik | RIKEN cDNA 2310057M         | 50         | 50         | 360.678192 |
| 223690    | Ankrd54       | ankyrin repeat domain 54    | 89.003418  | 107.821304 | 360.533569 |
| 218756    | Slc4a7        | solute carrier family 4, so | 109.032433 | 135.26683  | 360.068542 |
| 381822    | 1190002F15Rik | RIKEN cDNA 1190002F         | 50         | 50         | 359.731689 |
| 76547     | Tmem101       | transmembrane protein 1     | 83.9624939 | 123.736877 | 357.592133 |
| 404710    | Iqgap3        | IQ motif containing GTP     | 50         | 50         | 357.429443 |
| 68895     | Rasl11a       | RAS-like, family 11, me     | 50         | 50         | 357.104065 |
| 68214     | Gsto2         | glutathione S-transferase   | 50         | 50         | 356.162476 |
| 67391     | Fundc2        | FUN14 domain containin      | 64.1124954 | 94.2527466 | 355.871643 |
| 20197     | S100a3        | S100 calcium binding pr     | 50         | 50         | 355.807556 |
| 20589     | Ighmbp2       | immunoglobulin mu bind      | 142.346527 | 147.722015 | 355.796021 |
| 381306    | BC055324      | cDNA sequence BC0553        | 50         | 50         | 355.633362 |
| 71233     | Enkur         | enkurin, TRPC channel i     | 50         | 50         | 355.528198 |
| 74136     | Sec14l1       | SEC14-like 1 (S. cerevis    | 50         | 59.8736877 | 355.051636 |
| 230157    | Tmeff1        | transmembrane protein w     | 50         | 50         | 354.545532 |
| 30056     | Timm9         | translocase of inner mito   | 160.477692 | 151.006989 | 354.26123  |
| 77593     | Usp45         | ubiquitin specific petidas  | 116.110634 | 88.1793594 | 353.755096 |
| 94180     | Acsbg1        | acyl-CoA synthetase bub     | 50         | 50         | 353.331116 |
| 66405     | Mcts2         | malignant T cell amplific   | 112.828171 | 137.470963 | 351.743744 |
| 56496     | Tspan6        | tetraspanin 6               | 50         | 50         | 350.215485 |
| 242466    | Zfp462        | zinc finger protein 462     | 50         | 50         | 349.796448 |
| 232431    | Gprc5a        | G protein-coupled recept    | 50         | 50         | 348.12854  |
| 72119     | Tpx2          | TPX2, microtubule-assoc     | 50         | 50         | 346.053101 |
| 19872     | Rny1          | RNA, Y1 small cytoplas      | 50         | 50         | 344.215912 |
| 103551    | E130012A19Rik | RIKEN cDNA E130012A         | 50         | 50         | 344.064728 |
| 69757     | Leng1         | leukocyte receptor cluste   | 111.617844 | 157.664642 | 343.936554 |
| 27401     | Skp2          | S-phase kinase-associate    | 50         | 50         | 343.78537  |
| 67994     | Mrps11        | mitochondrial ribosomal     | 140.348862 | 166.802307 | 342.745178 |
| 100048499 | LOC100048499  | uncharacterized LOC100      | 110.860596 | 99.8295593 | 339.879333 |
| 18974     | Pole2         | polymerase (DNA direct      | 50         | 50         | 338.646851 |
| 64406     | Sp5           | trans-acting transcription  | 50         | 50         | 338.559753 |
| 319482    | 9530053A07Rik | RIKEN cDNA 9530053A         | 50         | 50         | 338.042145 |
| 56419     | Diap3         | diaphanous homolog 3 (D     | 50         | 50         | 336.786682 |
| 15394     | Hoxa1         | homeobox A1                 | 50         | 50         | 336.292053 |
| 232664    | Ccdc136       | coiled-coil domain conta    | 50         | 50         | 335.130249 |
| 75317     | 4930547N16Rik | RIKEN cDNA 4930547N         | 50         | 50         | 334.990601 |
| 234825    | Klhdc4        | kelch domain containing     | 115.557739 | 121.246971 | 332.124725 |
| 68281     | 4930430F08Rik | RIKEN cDNA 4930430F         | 50         | 71.0499573 | 330.502808 |
| 269033    | 4930503L19Rik | RIKEN cDNA 4930503L         | 50         | 50         | 329.723907 |
| 21384     | Tbx15         | T-box 15                    | 50         | 50         | 328.956512 |
| 268783    | Mtmt12        | myotubularin related pro    | 107.647842 | 141.252502 | 327.758545 |
| 56220     | Zfp386        | zinc finger protein 386 (   | 50         | 72.1534424 | 327.607361 |
| 66362     | Exosc3        | exosome component 3         | 149.494446 | 156.275391 | 327.125916 |
| 73680     | Zbtb8a        | zinc finger and BTB dom     | 50         | 50         | 325.753784 |
| 93737     | Pard6g        | par-6 partitioning defecti  | 50         | 50         | 325.375793 |
| 71306     | Mfap3l        | microfibrillar-associated   | 50         | 50         | 323.119598 |
| 66140     | Fam33a        | family with sequence sin    | 50         | 50         | 321.806641 |
| 243339    | Tmem130       | transmembrane protein 1     | 50         | 50         | 320.934052 |
| 66437     | Fis1          | fission 1 (mitochondrial    | 50         | 52.6317444 | 320.492004 |
| 18162     | Npr3          | natriuretic peptide recept  | 50         | 50         | 320.086121 |
| 70681     | Fam175a       | family with sequence sin    | 132.857178 | 114.732208 | 319.765686 |
| 319765    | Igf2bp2       | insulin-like growth facto   | 50         | 50         | 319.126465 |
| 105377    | Ankrd32       | ankyrin repeat domain 32    | 50         | 66.8397598 | 318.771484 |

|                 |                |                            |            |            |            |
|-----------------|----------------|----------------------------|------------|------------|------------|
| 214901          | Chtf18         | CTF18, chromosome tra      | 50         | 50         | 317.603149 |
| 217653          | Mis18bp1       | MIS18 binding protein 1    | 50         | 50         | 317.080566 |
| 22145           | Tuba4a         | tubulin, alpha 4A          | 134.027924 | 128.190414 | 316.801239 |
| 208628          | Kntc1          | kinetochore associated 1   | 50         | 50         | 315.795532 |
| 20539           | Slc7a5         | solute carrier family 7 (c | 50         | 50         | 314.975525 |
| 232827          | Nlrp2          | NLR family, pyrin doma     | 50         | 50         | 314.784943 |
| 242620          | Dmrta2         | doublesex and mab-3 rel    | 50         | 50         | 314.673187 |
| 268490          | Lsm12          | LSM12 homolog (S. cere     | 79.2003937 | 94.3178177 | 314.056976 |
| 66682           | Trappc5        | trafficking protein partic | 114.482071 | 136.633438 | 313.656006 |
| 77634           | Snape3         | small nuclear RNA activ    | 50         | 50         | 312.65033  |
| 66098           | Chchd6         | coiled-coil-helix-coiled-c | 50         | 50         | 312.366028 |
| 100342          | Fam46b         | family with sequence sim   | 50         | 50         | 310.755646 |
| 57810           | Cdon           | cell adhesion molecule-re  | 50         | 50         | 310.638977 |
| 239839          | Ccdc14         | coiled-coil domain conta   | 50         | 57.1404533 | 310.400696 |
| 232946          | Bloc1s3        | biogenesis of lysosome-r   | 89.0731201 | 113.200058 | 308.982544 |
| 12297           | Cacnb3         | calcium channel, voltage   | 50         | 50         | 308.505981 |
| 67030           | Fancl          | Fanconi anemia, comple     | 50         | 71.9652786 | 308.377808 |
| 270669          | Mbtps2         | membrane-bound transcr     | 50         | 50         | 307.871704 |
| 53885           | Nphp1          | nephronophthisis 1 (juve   | 50         | 58.2212982 | 307.569336 |
| 193385          | Fam65b         | family with sequence sim   | 50         | 74.3349304 | 307.104279 |
| 83675           | Bicc1          | bicaudal C homolog 1 (D    | 50         | 50         | 306.488068 |
| 66060           | 0610010012Rik  | RIKEN cDNA 06100100        | 50         | 52.9076157 | 306.465027 |
| 11636           | Ak1            | adenylate kinase 1         | 50         | 50         | 306.128174 |
| 22059           | Trp53          | transformation related pr  | 50         | 63.9410019 | 305.447876 |
| 24116           | Whsc2          | Wolf-Hirschhorn syndro     | 90.0046234 | 102.221848 | 302.332214 |
| 19249           | Ptpn13         | protein tyrosine phosphat  | 50         | 50         | 301.931274 |
| 71436           | Flrt3          | fibronectin leucine rich t | 50         | 50         | 301.546753 |
| 18108           | Nmt2           | N-myristoyltransferase 2   | 50         | 50         | 301.285461 |
| 101985          | AA960436       | expressed sequence AA9     | 73.850563  | 93.9995117 | 301.012695 |
| 100040736       | 9130206124Rik  | RIKEN cDNA 91302061        | 50         | 50         | 300.593628 |
| 78833           | Gins3          | GINS complex subunit 3     | 50         | 50         | 300.442474 |
| 13732           | Emp3           | epithelial membrane prot   | 50         | 50         | 300.192688 |
| 21939           | Cd40           | CD40 antigen               | 50         | 50         | 298.350586 |
| 100862531170359 | LOC1008625311G | tRNA modification GTP      | 129.848801 | 140.953995 | 297.844452 |
| 17245           | Mdm1           | transformed mouse 3T3      | 50         | 50         | 295.525818 |
| 67877           | Naa20          | N(alpha)-acetyltransferas  | 50         | 63.4996109 | 294.437958 |
| 11834           | Aqr            | aquarius                   | 57.8612518 | 68.2290115 | 294.13562  |
| 103743          | Tmem98         | transmembrane protein 9    | 52.5858727 | 55.9945297 | 294.083008 |
| 330959          | Snape5         | small nuclear RNA activ    | 104.335289 | 135.851105 | 294.071503 |
| 67222           | Srfbp1         | serum response factor bi   | 50         | 57.2182617 | 293.542358 |
| 71793           | Ints12         | integrator complex subun   | 61.6316414 | 79.0417023 | 292.461121 |
| 94220           | Cnm4           | cyclin M4                  | 50         | 55.6733894 | 291.833374 |
| 67486           | Polr3g         | polymerase (RNA) III (D    | 87.628334  | 65.2750778 | 289.572235 |
| 100043314       | Tigit          | T cell immunoreceptor w    | 50         | 50         | 289.258362 |
| 26895           | Cops7b         | COP9 (constitutive phot    | 117.934044 | 126.184341 | 288.642151 |
| 14299           | Ncs1           | neuronal calcium sensor    | 50         | 50         | 288.154114 |
| 240261          | Ccdc112        | coiled-coil domain conta   | 50         | 50         | 288.147522 |
| 28081           | D11Wsu99e      | DNA segment, Chr 11, v     | 78.8613815 | 98.2097092 | 286.846039 |
| 67008           | 1600012F09Rik  | RIKEN cDNA 1600012F        | 90.970993  | 78.5125961 | 286.676788 |
| 621080          | AI429214       | expressed sequence AI42    | 72.709938  | 96.589859  | 286.630798 |
| 54635           | Pdgfc          | platelet-derived growth f  | 50         | 61.5161743 | 286.392517 |
| 14221           | Fjx1           | four jointed box 1 (Dros   | 50         | 50         | 286.275818 |
| 233826          | Palb2          | partner and localizer of B | 50         | 56.2251282 | 285.851868 |
| 14697           | Gnb5           | guanine nucleotide bindi   | 50         | 50         | 285.810791 |
| 17231           | Mcpt8          | mast cell protease 8       | 50         | 50         | 285.746704 |
| 75659           | Wdr54          | WD repeat domain 54        | 50         | 50         | 285.648102 |
| 66959           | Dusp26         | dual specificity phosphat  | 50         | 50         | 285.531433 |
| 12571           | Cdk6           | cyclin-dependent kinase    | 50         | 50         | 284.566833 |
| 72930           | Ppp2r2b        | protein phosphatase 2 (fc  | 50         | 73.1338348 | 284.555328 |
| 12816           | Col12a1        | collagen, type XII, alpha  | 50         | 51.6739845 | 284.520813 |
| 69917           | Obfc2b         | oligonucleotide/oligosac   | 92.2510223 | 115.40419  | 284.037689 |

|        |               |                                   |            |            |            |
|--------|---------------|-----------------------------------|------------|------------|------------|
| 67538  | Zswim3        | zinc finger, SWIM doma            | 107.169418 | 132.037033 | 282.71814  |
| 22174  | Tyro3         | TYRO3 protein tyrosine            | 50         | 50         | 279.160461 |
| 16551  | Kif11         | kinesin family member 1           | 50         | 50         | 276.684082 |
| 101631 | Pwwp2b        | PWWP domain containi              | 50         | 50         | 276.672546 |
| 77591  | Ddx10         | DEAD (Asp-Glu-Ala-As              | 50         | 73.6855774 | 276.585449 |
| 242642 | Hpd1          | 4-hydroxyphenylpyruvat            | 50         | 50         | 275.905151 |
| 228859 | Fitm2         | fat storage-inducing trans        | 79.5093155 | 97.3495636 | 275.311951 |
| 80913  | Pum2          | pumilio 2 (Drosophila)            | 83.997345  | 110.64225  | 275.28894  |
| 103199 | Fig4          | FIG4 homolog (S. cerevis          | 85.3122406 | 121.058823 | 275.039154 |
| 66356  | 2310008H09Rik | RIKEN cDNA 2310008H09             | 114.242859 | 112.670952 | 274.789368 |
| 214239 | A430105I19Rik | RIKEN cDNA A430105I19             | 50         | 50         | 274.725281 |
| 15561  | Htr3a         | 5-hydroxytryptamine (ser          | 50         | 50         | 274.498505 |
| 74174  | Gtsf1         | gametocyte specific factor        | 50         | 50         | 274.358826 |
| 27366  | Txn14a        | thioredoxin-like 4A               | 50         | 50         | 274.033447 |
| 98366  | Smap1         | stromal membrane-associated       | 50         | 52.8425407 | 273.870789 |
| 270685 | Mthfd11       | methylenetetrahydrofolate         | 50         | 50         | 273.719604 |
| 332397 | Nanos1        | nanos homolog 1 (Drosophi         | 50         | 50         | 273.591431 |
| 209630 | Frm4a         | FERM domain containing            | 78.8217773 | 106.552299 | 271.09201  |
| 271981 | Tbck          | TBC1 domain containing            | 50         | 50         | 269.898987 |
| 66583  | Exosc1        | exosome component 1               | 50         | 50         | 267.545837 |
| 12578  | Cdkn2a        | cyclin-dependent kinase 2         | 50         | 50         | 267.383148 |
| 18452  | P4ha2         | procollagen-proline, 4-hydrox     | 50         | 50         | 266.778412 |
| 56220  | Zfp386        | zinc finger protein 386 (C        | 50         | 60.4579697 | 265.708649 |
| 71860  | Wdr16         | WD repeat domain 16               | 50         | 50         | 264.918213 |
| 228071 | Sestd1        | SEC14 and spectrin domain         | 50         | 50         | 264.656952 |
| 234912 | 9230110C19Rik | RIKEN cDNA 9230110C19             | 50         | 66.002243  | 264.150818 |
| 72569  | Bbs5          | Bardet-Biedl syndrome 5           | 50         | 55.0792084 | 264.011169 |
| 77532  | Jrkl          | jerky homolog-like (mouse)        | 50         | 50         | 263.912537 |
| 69706  | Lrr1          | leucine rich repeat protein       | 50         | 50         | 263.738373 |
| 17005  | Ltk           | leukocyte tyrosine kinase         | 50         | 50         | 263.610199 |
| 67883  | Uxs1          | UDP-glucuronate decarboxyl        | 50         | 50         | 263.511597 |
| 28015  | Polr2m        | polymerase (RNA) II (DNA          | 67.8781357 | 84.6411514 | 263.186218 |
| 66209  | 1110054O05Rik | RIKEN cDNA 1110054O05             | 97.775116  | 130.748215 | 263.058044 |
| 101351 | A130022J15Rik | RIKEN cDNA A130022J15             | 50         | 50         | 260.907013 |
| 211666 | Mgst2         | microsomal glutathione S-transfer | 50         | 70.4105072 | 260.698334 |
| 20908  | Stx3          | syntaxin 3                        | 104.230728 | 113.508469 | 260.418976 |
| 171170 | Mbnl3         | muscleblind-like 3 (Drosophi      | 50         | 50         | 260.128113 |
| 19099  | Mapk8ip1      | mitogen-activated protein kinase  | 50         | 50         | 259.976929 |
| 210992 | Lpcat1        | lysophosphatidylcholine acyl      | 50         | 50         | 259.640045 |
| 68190  | 5330426P16Rik | RIKEN cDNA 5330426P16             | 50         | 50         | 259.621979 |
| 12981  | Csf2          | colony stimulating factor 2       | 50         | 50         | 258.861145 |
| 67291  | Ccdc137       | coiled-coil domain containing     | 75.4743652 | 96.5346832 | 258.657379 |
| 67180  | Yipf5         | Yip1 domain family, member        | 81.5117493 | 86.7901077 | 256.826782 |
| 64297  | Gprc5b        | G protein-coupled receptor        | 50         | 50         | 255.715927 |
| 68925  | Rpap1         | RNA polymerase II associated      | 76.8542023 | 114.787369 | 255.617325 |
| 20729  | Spin1         | spindlin 1                        | 50         | 50         | 255.507233 |
| 237877 | Atad5         | ATPase family, AAA domain         | 50         | 50         | 254.698746 |
| 73673  | 2410076I21Rik | RIKEN cDNA 2410076I21             | 97.9493866 | 110.246124 | 254.158112 |
| 54607  | Socs6         | suppressor of cytokine signaling  | 50         | 50         | 254.094025 |
| 14349  | Fv1           | Friend virus susceptibility       | 50         | 50         | 253.91983  |
| 70408  | Polr3f        | polymerase (RNA) III (DNA         | 104.021614 | 124.662109 | 253.001236 |
| 57080  | Gtf2ird1      | general transcription factor      | 50         | 50         | 252.169754 |
| 16469  | Jrk           | jerky                             | 50         | 72.2185135 | 252.123749 |
| 243312 | Elfn1         | leucine rich repeat and fibron    | 50         | 73.22155   | 251.972565 |
| 73067  | Tmem192       | transmembrane protein 192         | 65.0091553 | 83.9366226 | 251.379333 |
| 230500 | Efcab7        | EF-hand calcium binding           | 50         | 50         | 250.275055 |
| 240334 | Pcyox1l       | prenylcysteine oxidase 1          | 50         | 50         | 248.501968 |
| 245522 | Zc4h2         | zinc finger, C4H2 domain          | 50         | 50         | 248.275192 |
| 320213 | Senp5         | SUMO/sentrin specific prote       | 50         | 57.3611488 | 248.101013 |
| 74238  | Mterfd3       | MTERF domain containing           | 50         | 59.367218  | 247.670471 |
| 53892  | Ppm1d         | protein phosphatase 1D (ser       | 50         | 50         | 247.322113 |



|        |               |                             |            |            |            |
|--------|---------------|-----------------------------|------------|------------|------------|
| 67553  | Gsted         | glutathione S-transferase   | 50         | 50         | 246.978668 |
| 15408  | Hoxb13        | homeobox B13                | 50         | 50         | 245.397827 |
| 65112  | Pmepal        | prostate transmembrane      | 50         | 50         | 245.159546 |
| 116905 | Dph1          | DPH1 homolog (S. cerev      | 90.2184982 | 109.100204 | 244.328064 |
| 407821 | Znrf3         | zinc and ring finger 3      | 53.2734146 | 50         | 243.79892  |
| 268469 | Zfp652        | zinc finger protein 652     | 50         | 74.5782623 | 243.76442  |
| 240672 | Dusp5         | dual specificity phosphat   | 50         | 50         | 243.333893 |
| 67573  | Loxl4         | lysyl oxidase-like 4        | 103.742798 | 90.9578705 | 242.293701 |
| 15425  | Hoxc6         | homeobox C6                 | 50         | 50         | 241.194351 |
| 633640 | Gm7120        | predicted gene 7120         | 50         | 50         | 241.182831 |
| 235973 | A630095E13Rik | RIKEN cDNA A630095          | 50         | 50         | 239.915878 |
| 74430  | 4930452B06Rik | RIKEN cDNA 4930452          | 50         | 50         | 238.759018 |
| 72267  | Lrrc8e        | leucine rich repeat conta   | 50         | 53.391449  | 238.736008 |
| 116972 | Fam57a        | family with sequence sim    | 50         | 50         | 238.660431 |
| 69195  | Tmem121       | transmembrane protein 1     | 50         | 50         | 238.0672   |
| 53607  | Snrpa         | small nuclear ribonucleo    | 50         | 50         | 238.003113 |
| 19092  | Prkg2         | protein kinase, cGMP-de     | 50         | 50         | 236.974426 |
| 18693  | Pick1         | protein interacting with C  | 50         | 58.3486214 | 236.445282 |
| 72155  | Cenpn         | centromere protein N        | 50         | 50         | 236.305603 |
| 66044  | Dtd1          | D-tyrosyl-tRNA deacylas     | 50         | 50         | 236.032837 |
| 79264  | Krit1         | KRIT1, ankyrin repeat co    | 50         | 64.0838852 | 235.6138   |
| 66371  | Chmp4c        | charged multivesicular b    | 50         | 63.5222473 | 234.940063 |
| 66311  | Cenpw         | centromere protein W        | 50         | 50         | 234.788879 |
| 15395  | Hoxa10        | homeobox A10                | 50         | 50         | 234.765869 |
| 233276 | Tubgcp5       | tubulin, gamma complex      | 71.1209869 | 105.627075 | 234.282745 |
| 109229 | Fam118b       | family with sequence sim    | 50         | 50         | 233.91629  |
| 237859 | Ccdc55        | coiled-coil domain conta    | 50         | 50         | 233.017426 |
| 230098 | E130306D19Rik | RIKEN cDNA E130306          | 50         | 50         | 232.660843 |
| 58186  | Rad18         | RAD18 homolog (S. cere      | 50         | 50         | 232.108704 |
| 76916  | 4930455C21Rik | RIKEN cDNA 4930455          | 82.5478058 | 112.472893 | 231.858917 |
| 74998  | Rab11fip2     | RAB11 family interactin     | 50         | 65.2298126 | 231.817841 |
| 57764  | Ntn4          | netrin 4                    | 50         | 50         | 231.480972 |
| 74365  | Lonrf3        | LON peptidase N-termin      | 50         | 51.508461  | 231.288712 |
| 26432  | Plod2         | procollagen lysine, 2-oxo   | 50         | 50         | 231.027435 |
| 50912  | Exosc10       | exosome component 10        | 50         | 50         | 230.853241 |
| 52592  | Brms1l        | breast cancer metastasis-   | 50         | 59.6529922 | 230.823669 |
| 105203 | BC016423      | cDNA sequence BC0164        | 63.4249573 | 85.0924454 | 229.242828 |
| 17245  | Mdm1          | transformed mouse 3T3 c     | 50         | 50         | 229.242828 |
| 14841  | Gsg2          | germ cell-specific gene 2   | 50         | 50         | 229.190247 |
| 71844  | Nup11         | nucleoporin like 1          | 58.0703659 | 79.4052811 | 228.649612 |
| 66337  | 1700025K23Rik | RIKEN cDNA 1700025          | 50         | 57.6695557 | 227.155884 |
| 231830 | Micall2       | MICAL-like 2                | 50         | 69.232048  | 226.981689 |
| 71793  | Ints12        | integrator complex subun    | 59.524662  | 79.8792114 | 226.940613 |
| 72136  | Chst14        | carbohydrate (N-acetylga    | 50         | 56.3680153 | 226.388474 |
| 207596 | Thsd4         | thrombospondin, type I,     | 50         | 50         | 226.138702 |
| 171180 | Syt12         | synaptotagmin XII           | 74.3733521 | 96.0706558 | 225.673645 |
| 18973  | Pole          | polymerase (DNA direct      | 50         | 50         | 224.958832 |
| 69928  | Apitd1        | apoptosis-inducing, TAF     | 50         | 50         | 224.267014 |
| 74041  | 4632434I11Rik | RIKEN cDNA 4632434          | 50         | 50         | 223.348419 |
| 237436 | Gas2l3        | growth arrest-specific 2 l  | 50         | 65.8367233 | 223.046051 |
| 76167  | Snmp35        | small nuclear ribonucleo    | 50         | 50         | 222.871887 |
| 269356 | Slc4a11       | solute carrier family 4, so | 50         | 50         | 222.796295 |
| 68190  | 5330426P16Rik | RIKEN cDNA 5330426          | 50         | 50         | 222.755203 |
| 70546  | Zdhhc2        | zinc finger, DHHC doma      | 50         | 54.163887  | 221.522751 |
| 106565 | Dlk2          | delta-like 2 homolog (Dr    | 50         | 71.8025894 | 221.034698 |
| 223669 | Zfp7          | zinc finger protein 7       | 50         | 50         | 220.970612 |
| 13639  | Efna4         | ephrin A4                   | 50         | 50         | 220.267288 |
| 20460  | Stil          | Scf/Tal1 interrupting loc   | 50         | 50         | 220.157196 |
| 66197  | Cks2          | CDC28 protein kinase re     | 50         | 50         | 219.831818 |
| 244238 | Mrgpre        | MAS-related GPR, mem        | 50         | 50         | 219.586975 |
| 57230  | Sap30bp       | SAP30 binding protein       | 53.9308548 | 76.0325928 | 219.174515 |

|                 |                   |                                                           |            |            |            |
|-----------------|-------------------|-----------------------------------------------------------|------------|------------|------------|
| 69137           | 2200002K05Rik     | RIKEN cDNA 2200002K05                                     | 50         | 50         | 219.098923 |
| 381066          | Zfp948            | zinc finger protein 948                                   | 50         | 50         | 218.901733 |
| 114679          | Selm              | selenoprotein M                                           | 50         | 56.9423904 | 217.552612 |
| 57808           | Rpl35a            | ribosomal protein L35A                                    | 50         | 50         | 216.384247 |
| 20055           | Rps16             | ribosomal protein S16                                     | 50         | 50         | 215.919189 |
| 56844           | Tssc4             | tumor-suppressing subch                                   | 50         | 50         | 215.919189 |
| 75216           | 4930534B04Rik     | RIKEN cDNA 4930534B04                                     | 50         | 65.5608521 | 214.634155 |
| 103765          | Tmem17            | transmembrane protein 17                                  | 50         | 50         | 214.448456 |
| 66184           | Rps4y2            | ribosomal protein S4, Y-                                  | 50         | 50         | 214.100098 |
| 13797           | Emx2              | empty spiracles homolog 2                                 | 50         | 50         | 213.541382 |
| 12572           | Cdk7              | cyclin-dependent kinase 7                                 | 64.6653824 | 72.8254318 | 213.390198 |
| 17954           | Nap112            | nucleosome assembly protein 112                           | 50         | 50         | 213.239014 |
| 212391          | Lcor              | ligand dependent nuclear corepressor                      | 50         | 65.2750778 | 212.913651 |
| 11486           | Ada               | adenosine deaminase                                       | 50         | 64.5252762 | 212.611298 |
| 171167          | Fut10             | fucosyltransferase 10                                     | 50         | 50         | 212.460114 |
| 240084          | Cchcr1            | coiled-coil alpha-helical coiled-coil domain containing 1 | 50         | 56.7216949 | 212.070648 |
| 69310           | Pacrg             | PARK2 co-regulated                                        | 50         | 68.8458252 | 211.972061 |
| 66101           | Ppih              | peptidyl prolyl isomerase                                 | 50         | 50         | 211.972061 |
| 108673          | Ccdc86            | coiled-coil domain containing 86                          | 50         | 56.1501541 | 211.617111 |
| 69885           | 2610002D18Rik     | RIKEN cDNA 2610002D18                                     | 50         | 50         | 211.454437 |
| 17187           | Max               | Max protein                                               | 50         | 50         | 211.018951 |
| 76793           | Snip1             | Smad nuclear interacting protein 1                        | 50         | 50         | 209.507156 |
| 77015           | Mpped2            | metallophosphoesterase domain containing 2                | 96.7089539 | 76.8149338 | 209.355988 |
| 110253          | Triobp            | TRIO and F-actin binding protein                          | 50         | 50         | 209.204788 |
| 77622           | Apex2             | apurinic/aprimidinic endonuclease 2                       | 50         | 54.3294067 | 208.373291 |
| 20841           | Zfp143            | zinc finger protein 143                                   | 50         | 62.7073669 | 208.123505 |
| 20238           | Atxn1             | ataxin 1                                                  | 83.8626938 | 98.8816986 | 208.047928 |
| 74111           | Rbm19             | RNA binding motif protein 19                              | 50         | 51.2325897 | 207.809662 |
| 381259          | Als2cr4           | amyotrophic lateral sclerosis 2 critical region 4         | 50         | 50         | 207.646973 |
| 72008           | Zfyve19           | zinc finger, FYVE domain containing 19                    | 52.2373466 | 50         | 207.623962 |
| 69408           | Dnajc17           | DnaJ (Hsp40) homolog, class B, member 17                  | 50         | 67.9757767 | 207.582886 |
| 19014           | Med1              | mediator complex subunit 1                                | 50         | 50         | 207.541809 |
| 67219           | Med18             | mediator of RNA polymerase II transcription subunit 18    | 50         | 50         | 207.15892  |
| 74187           | Katnb1            | katanin p80 (WD40-containing domain) 1                    | 50         | 50         | 206.879562 |
| 75284           | Bcdin3d           | BCDIN3 domain containing 3                                | 50         | 60.1495552 | 205.885376 |
| 101831          | C230052I12Rik     | RIKEN cDNA C230052I12                                     | 50         | 70.4331436 | 205.117981 |
| 56401           | Lepre1            | leprecan 1                                                | 50         | 59.8736877 | 204.577332 |
| 269060          | Dagla             | diacylglycerol lipase, alpha                              | 50         | 50         | 204.531326 |
| 66912           | Bzw2              | basic leucine zipper and winged helix domain containing 2 | 96.4998474 | 82.0833435 | 203.484558 |
| 264134          | Ttc26             | tetratricopeptide repeat domain containing 26             | 50         | 50         | 203.408981 |
| 71785           | Pdgfd             | platelet-derived growth factor domain containing 1        | 50         | 50         | 202.542969 |
| 100568458I71766 | Raver1-fdx11lRave | Raver1-Fdx11 readthrough                                  | 50         | 50         | 202.066422 |
| 73754           | Thap1             | THAP domain containing 1                                  | 60.5559692 | 84.4756317 | 201.060745 |
| 66656           | Eef1d             | eukaryotic translation elongation factor 1 delta          | 50         | 50         | 200.682785 |
| 83672           | Syt13             | synaptotagmin-like 3                                      | 59.9682312 | 84.2223969 | 200.595703 |
| 97863           | C78339            | expressed sequence C78339                                 | 50         | 50         | 200.403427 |
| 230674          | Kdm4a             | lysine (K)-specific demethylase 4a                        | 50         | 63.9735413 | 200.217743 |
| 52864           | Slx4              | SLX4 structure-specific endonuclease                      | 50         | 50         | 199.700104 |
| 20289           | Scx               | scleraxis                                                 | 50         | 50         | 199.624527 |
| 78611           | Btbd19            | BTB (POZ) domain containing 19                            | 50         | 50         | 198.281967 |
| 546336          | Prrg1             | proline rich Gla (G-carboxy terminal) domain containing 1 | 50         | 50         | 197.968109 |
| 245631          | Mum111            | melanoma associated antigen 111                           | 50         | 50         | 197.968109 |
| 78755           | Fam122b           | family with sequence similarity 122B                      | 51.7541656 | 69.0438843 | 197.85144  |
| 59004           | Pias4             | protein inhibitor of activated signal transduction 4      | 50         | 70.8518982 | 197.752838 |
| 15275           | Hk1               | hexokinase 1                                              | 50         | 50         | 197.06102  |
| 78796           | Zcchc4            | zinc finger, CCHC domain containing 4                     | 50         | 50         | 196.724152 |
| 57265           | Fzd2              | frizzled homolog 2 (Drosophila)                           | 50         | 50         | 196.660065 |
| 76303           | Osbp              | oxysterol binding protein                                 | 50         | 50         | 196.520386 |
| 75747           | Sesn3             | sestrin 3                                                 | 50         | 72.2185135 | 196.305115 |
| 70892           | Ttl7              | tubulin tyrosine ligase-like 7                            | 50         | 50         | 195.881149 |
| 17454           | Mov10             | Moloney leukemia virus 10                                 | 67.1462402 | 80.5342255 | 195.70697  |

|                 |                 |                             |            |            |            |
|-----------------|-----------------|-----------------------------|------------|------------|------------|
| 75668           | Rasl10a         | RAS-like, family 10, me     | 50         | 50         | 195.189331 |
| 386454          | Rnf39           | ring finger protein 39      | 50         | 50         | 195.038147 |
| 407793          | BC039966        | cDNA sequence BC0399        | 50         | 50         | 194.921478 |
| 101148          | B630005N14Rik   | RIKEN cDNA B630005          | 50         | 50         | 194.57312  |
| 18483           | Palm            | paralemmin                  | 50         | 62.7399025 | 194.561615 |
| 66768           | Pacrgl          | PARK2 co-regulated-like     | 50         | 50         | 194.19516  |
| 54651           | Usp27x          | ubiquitin specific peptid   | 95.5984344 | 91.3638916 | 194.043976 |
| 266744          | Lgsn            | lengsin, lens protein with  | 50         | 67.2033386 | 192.951202 |
| 24083           | Gm16515         | predicted gene, Gm1651      | 50         | 50         | 192.712921 |
| 24017           | Rnf13           | ring finger protein 13      | 50         | 71.0499573 | 192.195297 |
| 71310           | Tbc1d9          | TBC1 domain family, m       | 50         | 50         | 192.119705 |
| 332579          | Card9           | caspase recruitment dom     | 50         | 50         | 191.782837 |
| 108950          | 1700049L16Rik   | hematological and neuro     | 50         | 61.4836349 | 190.271027 |
| 216019          | Hkdc1           | hexokinase domain conta     | 50         | 50         | 189.794479 |
| 18971           | Pold1           | polymerase (DNA direct      | 50         | 50         | 188.527527 |
| 58175           | Rgs20           | regulator of G-protein sig  | 50         | 50         | 188.410843 |
| 208820          | Gm11818         | predicted gene 11818        | 50         | 70.764183  | 188.300751 |
| 237246          | BC022960        | cDNA sequence BC0229        | 50         | 50         | 188.096985 |
| 83671           | Syt12           | synaptotagmin-like 2        | 50         | 60.3476181 | 187.696014 |
| 270118          | Maml2           | mastermind like 2 (Dros     | 50         | 62.9606018 | 187.673019 |
| 72543           | Fam125b         | family with sequence sim    | 50         | 70.6212921 | 187.673019 |
| 407785          | Ndufs6          | NADH dehydrogenase (u       | 79.4744644 | 70.465683  | 187.544846 |
| 67694           | Ift74           | intraflagellar transport 74 | 50         | 50         | 187.370651 |
| 67774           | Loh12cr1        | loss of heterozygosity, 1   | 78.6475143 | 80.2102585 | 186.864532 |
| 68423           | Ankrd13d        | ankyrin repeat domain 13    | 50         | 50         | 186.678833 |
| 19012           | Ppap2a          | phosphatidic acid phosph    | 50         | 50         | 186.550659 |
| 226182          | Taf5            | TAF5 RNA polymerase         | 63.4598083 | 91.7727432 | 186.539154 |
| 193452          | Zfp184          | zinc finger protein 184 (   | 50         | 50         | 186.376465 |
| 18599           | Padi1           | peptidyl arginine deimin    | 50         | 50         | 185.835846 |
| 330836          | Slc7a6          | solute carrier family 7 (c  | 50         | 50         | 184.853165 |
| 214616          | Spata511        | spermatogenesis associat    | 50         | 50         | 184.84166  |
| 66067           | Gtpbp8          | GTP-binding protein 8 (p    | 50         | 50         | 184.84166  |
| 99512           | Wdr47           | WD repeat domain 47         | 50         | 62.7724457 | 183.650299 |
| 69727           | Usp46           | ubiquitin specific peptid   | 50         | 50         | 183.586197 |
| 14201           | Fhl3            | four and a half LIM dom     | 50         | 50.9241829 | 183.283844 |
| 384864          | Gm1943          | WD repeat domain 70 ps      | 50         | 50         | 183.045563 |
| 11490           | Adam15          | a disintegrin and metallo   | 50         | 60.6786613 | 182.452332 |
| 26448           | Stk30           | serine/threonine kinase 3   | 50         | 50         | 181.877197 |
| 71131           | Zfp689          | zinc finger protein 689     | 50         | 72.0204544 | 181.423645 |
| 69590           | Gpx8            | glutathione peroxidase 8    | 50         | 59.6529922 | 181.260971 |
| 13394           | Dlx4            | distal-less homeobox 4      | 50         | 50         | 181.231384 |
| 67096           | Mmache          | methylmalonic aciduria c    | 59.041481  | 64.3045807 | 180.040024 |
| 57753           | Noc3l           | nucleolar complex associ    | 69.8805618 | 82.1611481 | 179.801743 |
| 100042856 74558 | Gm4070 Gvin1 Gr | predicted gene 4070 GTH     | 50         | 50         | 179.121429 |
| 665162          | Gm15754         | predicted gene 15754        | 50         | 50         | 179.086929 |
| 68052           | Rps13           | ribosomal protein S13       | 50         | 56.280304  | 178.354034 |
| 67980           | Gnpda2          | glucosamine-6-phosphate     | 50         | 50         | 177.726288 |
| 67574           | Alg13           | asparagine-linked glycos    | 62.4189911 | 82.5247345 | 177.650711 |
| 243979          | Mrgprb2         | MAS-related GPR, mem        | 50         | 50         | 176.860291 |
| 70239           | Gtf3c5          | general transcription fact  | 50         | 50         | 176.610519 |
| 60507           | Qtrt1           | queuine tRNA-ribosyltra     | 50         | 50         | 176.296661 |
| 227099          | Pms1            | postmeiotic segregation i   | 50         | 50.9567184 | 175.930206 |
| 240726          | Slco5a1         | solute carrier organic ani  | 50         | 50         | 175.174301 |
| 12836           | Col7a1          | collagen, type VII, alpha   | 50         | 50         | 174.697754 |
| 56176           | Pigp            | phosphatidylinositol gly    | 50         | 50         | 174.535065 |
| 16201           | Ilf3            | interleukin enhancer bind   | 50         | 50         | 174.244202 |
| 100039596       | Tcf24           | transcription factor 24     | 50         | 50         | 174.16861  |
| 100038398       | Gm10567         | predicted gene 10567        | 50         | 50         | 173.692078 |
| 268880          | AI480653        | expressed sequence AI48     | 50         | 50         | 173.442291 |
| 675363          | Gm9640          | predicted gene 9640         | 50         | 64.6030884 | 173.279602 |
| 170762          | Nup155          | nucleoporin 155             | 50         | 54.3746796 | 172.860565 |

|        |               |                            |            |            |            |
|--------|---------------|----------------------------|------------|------------|------------|
| 22351  | Vill          | villin-like                | 50         | 50         | 171.605118 |
| 67169  | Nradd         | neurotrophin receptor ass  | 50         | 50         | 170.988892 |
| 381677 | Vgf           | VGF nerve growth factor    | 50         | 70.8193588 | 170.901794 |
| 20588  | Smarcc1       | SWI/SNF related, matrix    | 50         | 50         | 170.686523 |
| 208836 | Fanci         | Fanconi anemia, comple     | 50         | 50         | 170.209976 |
| 78832  | 2700078E11Rik | RIKEN cDNA 2700078E11      | 50.0305634 | 61.5388107 | 169.623322 |
| 64929  | Scel          | sciellin                   | 50         | 50         | 169.355469 |
| 67220  | Plekho1       | pleckstrin homology dom    | 50         | 71.4913483 | 169.087616 |
| 75291  | Zbtb3         | zinc finger and BTB dom    | 50         | 50         | 168.803345 |
| 66590  | Farsa         | phenylalanyl-tRNA synt     | 50         | 70.0695572 | 168.79184  |
| 24069  | Sufu          | suppressor of fused hom    | 50         | 50         | 167.408203 |
| 16854  | Lgals3        | lectin, galactose binding  | 50         | 50         | 167.344116 |
| 14823  | Grm8          | glutamate receptor, meta   | 50         | 50         | 167.291534 |
| 399558 | Flrt2         | fibronectin leucine rich t | 50         | 50         | 167.041748 |
| 432628 | Mfsd2b        | major facilitator superfar | 50         | 50         | 165.396835 |
| 78619  | Zfp449        | zinc finger protein 449    | 50         | 50         | 164.304062 |
| 56376  | Pdim5         | PDZ and LIM domain 5       | 50         | 50         | 163.548157 |
| 83922  | Tsga14        | testis specific gene A14   | 50         | 65.0543823 | 162.769257 |
| 70325  | Pigw          | phosphatidylinositol gly   | 50         | 70.3779678 | 162.693665 |
| 56455  | Dynl11        | dynein light chain LC8-t   | 50         | 54.9363213 | 162.682159 |
| 17309  | Mgat3         | mannoside acetylglucosa    | 50         | 50         | 161.763565 |
| 51944  | D2Ertd750e    | DNA segment, Chr 2, E      | 50         | 50         | 161.548309 |
| 74307  | 1700092M07Rik | RIKEN cDNA 1700092M07      | 58.0006599 | 57.3385162 | 161.472717 |
| 320642 | A630066F11Rik | RIKEN cDNA A630066F11      | 58.414135  | 66.5313492 | 161.245941 |
| 399603 | Fam84b        | family with sequence sim   | 50         | 50         | 161.158844 |
| 70422  | Ints2         | integrator complex subun   | 50         | 50         | 160.769379 |
| 270685 | Mthfd11       | methylenetetrahydrofolat   | 50         | 50         | 160.519608 |
| 71924  | Tube1         | epsilon-tubulin 1          | 50         | 50         | 159.967468 |
| 171567 | Nme7          | non-metastatic cells 7, pr | 50         | 63.6552277 | 159.612518 |
| 68229  | AI846148      | expressed sequence AI84    | 50         | 50         | 159.415344 |
| 12556  | Cdh16         | cadherin 16                | 50         | 50         | 158.973297 |
| 230767 | Iqcc          | IQ motif containing C      | 50         | 50         | 158.315979 |
| 69955  | Fars2         | phenylalanine-tRNA syn     | 50         | 50         | 158.130295 |
| 17865  | Mybl2         | myeloblastosis oncogene    | 50         | 50         | 158.043213 |
| 72415  | Sgol1         | shugoshin-like 1 (S. pom   | 50         | 50         | 157.839447 |
| 215798 | Gpr126        | G protein-coupled recept   | 50         | 50         | 157.665253 |
| 192897 | Itgb4         | integrin beta 4            | 50         | 50         | 157.310303 |
| 140571 | Plxnb3        | plexin B3                  | 50         | 64.5153809 | 156.932343 |
| 68531  | 1110020A21Rik | RIKEN cDNA 1110020A21      | 50         | 50         | 156.81076  |
| 69269  | Scnm1         | sodium channel modifier    | 50         | 72.1307983 | 156.735153 |
| 16878  | Lif           | leukemia inhibitory fact   | 50         | 50         | 156.40979  |
| 21898  | Tlr4          | toll-like receptor 4       | 50         | 50         | 156.141937 |
| 192287 | Slc25a36      | solute carrier family 25,  | 50         | 53.1834869 | 156.118927 |
| 243659 | Styk1         | serine/threonine/tyrosine  | 50         | 50         | 156.05484  |
| 21983  | Tpbp          | trophoblast glycoprotein   | 50         | 50         | 156.03183  |
| 22673  | Zfp185        | zinc finger protein 185    | 50         | 57.371048  | 155.729477 |
| 17688  | Msh6          | mutS homolog 6 (E. coli)   | 50         | 73.3092651 | 155.717987 |
| 212679 | Mars2         | methionine-tRNA synthe     | 50         | 50         | 154.107574 |
| 22038  | Plscr1        | phospholipid scramblase    | 50         | 50         | 153.95639  |
| 194744 | Slc25a43      | solute carrier family 25,  | 50         | 50.5931396 | 153.816711 |
| 58230  | Rnf8          | ring finger protein 8      | 50         | 50         | 153.654022 |
| 18510  | Pax8          | paired box gene 8          | 50         | 50         | 153.566925 |
| 14420  | Galc          | galactosylceramidase       | 50         | 50         | 153.427246 |
| 66658  | Ccdc51        | coiled-coil domain conta   | 50         | 72.7150803 | 152.962204 |
| 233902 | Fbxl19        | F-box and leucine-rich re  | 50         | 73.2441864 | 152.950714 |
| 77065  | Ints7         | integrator complex subun   | 50         | 50         | 152.247391 |
| 67371  | Gtf3c6        | general transcription fact | 50         | 61.9349289 | 151.945023 |
| 217216 | BC030867      | cDNA sequence BC030867     | 50         | 50         | 151.880936 |
| 70551  | Tmtc4         | transmembrane and tetra    | 50         | 50         | 151.619659 |
| 12021  | Bard1         | BRCA1 associated RINC      | 50         | 50         | 151.521057 |
| 268980 | Strn          | striatin, calmodulin bindi | 50         | 50         | 151.47998  |

|           |               |                            |            |            |            |
|-----------|---------------|----------------------------|------------|------------|------------|
| 67304     | 3110070M22Rik | RIKEN cDNA 3110070M        | 50         | 60.9545326 | 151.427399 |
| 100043040 | 1110002L01Rik | RIKEN cDNA 1110002L        | 50         | 50         | 151.264709 |
| 80707     | Wwox          | WW domain-containing       | 52.8852844 | 72.2185135 | 151.177612 |
| 64051     | Sv2a          | synaptic vesicle glycopro  | 50         | 50         | 150.549881 |
| 102747    | Lrrc49        | leucine rich repeat conta  | 50         | 50         | 150.334625 |
| 74125     | Armc8         | armadillo repeat containi  | 50         | 50         | 150.259033 |
| 217430    | Pqlc3         | PQ loop repeat containin   | 50         | 52.0149307 | 149.956665 |
| 69785     | Ceacam13      | carcinoembryonic antige    | 50         | 50         | 149.445618 |
| 55984     | Camkk1        | calcium/calmodulin-depe    | 50         | 50         | 149.20076  |
| 66236     | 1500011B03Rik | RIKEN cDNA 1500011B        | 50         | 50         | 149.113678 |
| 18227     | Nr4a2         | nuclear receptor subfami   | 50         | 65.9470673 | 147.306061 |
| 71354     | Wdr31         | WD repeat domain 31        | 50         | 50         | 147.003708 |
| 14853     | Gspt2         | G1 to S phase transition   | 50         | 62.3536911 | 147.003708 |
| 76781     | Mettl4        | methyltransferase like 4   | 50         | 50         | 146.538666 |
| 212276    | Zfp748        | zinc finger protein 748    | 50         | 59.4874687 | 145.933929 |
| 57258     | Xpo4          | exportin 4                 | 50         | 50         | 145.846848 |
| 94092     | Trim16        | tripartite motif-containin | 50         | 50         | 145.457397 |
| 94216     | Col4a6        | collagen, type IV, alpha   | 50         | 50         | 145.143524 |
| 12386     | Ctnna2        | catenin (cadherin associa  | 50         | 50         | 145.067932 |
| 56190     | Rbm38         | RNA binding motif prote    | 50         | 50         | 145.067932 |
| 71592     | Pogk          | pogo transposable eleme    | 53.7217407 | 50         | 144.21344  |
| 66067     | Gtpbp8        | GTP-binding protein 8 (p   | 50         | 50         | 144.178925 |
| 72469     | Plcd3         | phospholipase C, delta 3   | 50         | 50         | 144.050751 |
| 246154    | Vasn          | vasorin                    | 50         | 50         | 143.487122 |
| 213027    | Evi5l         | ecotropic viral integratio | 50         | 50         | 143.44603  |
| 71831     | 1700007B14Rik | RIKEN cDNA 1700007B        | 50         | 50         | 143.434525 |
| 226075    | Glis3         | GLIS family zinc finger    | 50         | 50         | 142.916901 |
| 194952    | Jmjd4         | jumonji domain containi    | 50         | 50         | 142.89389  |
| 74420     | 4933406P04Rik | RIKEN cDNA 4933406P        | 70.6077118 | 64.580452  | 141.760025 |
| 100043899 | R3hdml        | R3H domain containing-     | 50         | 50         | 141.33606  |
| 100040608 | Fancl         | Fanconi anemia, comple     | 53.2686615 | 56.3354759 | 141.271988 |
| 214639    | 4930486L24Rik | RIKEN cDNA 4930486L        | 50         | 50         | 140.795441 |
| 381534    | Ube2u         | ubiquitin-conjugating en   | 50         | 50         | 140.754349 |
| 235584    | Dusp7         | dual specificity phosphat  | 50         | 56.1374168 | 140.568665 |
| 74254     | Gpn1          | GPN-loop GTPase 1          | 50         | 63.5547791 | 140.330383 |
| 66993     | Smardc3       | SWI/SNF related, matrix    | 50         | 51.6838837 | 140.202209 |
| 68916     | Cdkal1        | CDK5 regulatory subuni     | 50         | 50         | 140.190704 |
| 71988     | Esco2         | establishment of cohesio   | 50         | 50         | 139.888336 |
| 74255     | Smu1          | smu-1 suppressor of mec    | 50         | 56.6113472 | 139.475891 |
| 110784    | Nr3c2         | nuclear receptor subfami   | 50         | 50         | 139.411804 |
| 117171    | 1110038F14Rik | RIKEN cDNA 1110038F        | 50         | 50         | 139.272125 |
| 17756     | Mtap2         | microtubule-associated p   | 50         | 50         | 139.26062  |
| 22351     | Vill          | villin-like                | 50         | 50         | 139.173523 |
| 71436     | Flrt3         | fibronectin leucine rich t | 50         | 50         | 138.807068 |
| 228356    | 1110051M20Rik | RIKEN cDNA 1110051M        | 50         | 50         | 138.772568 |
| 232879    | Zbtb45        | zinc finger and BTB don    | 50         | 50         | 138.731476 |
| 209737    | Kif15         | kinesin family member 1    | 50         | 50         | 138.254944 |
| 223739    | 5031439G07Rik | RIKEN cDNA 5031439G        | 50         | 50         | 138.10376  |
| 18968     | Pola1         | polymerase (DNA direct     | 50         | 50         | 137.88356  |
| 237336    | Tbpl1         | TATA box binding prote     | 50         | 52.7647285 | 137.400436 |
| 106628    | Trip10        | thyroid hormone recepto    | 50         | 52.9302521 | 136.882812 |
| 56224     | Tspan5        | tetraspanin 5              | 50         | 50         | 136.871307 |
| 14862     | Gstm1         | glutathione S-transferase  | 50         | 50         | 135.918213 |
| 73261     | 1700037C18Rik | RIKEN cDNA 1700037C        | 50         | 50         | 135.725952 |
| 233552    | Gdpd5         | glycerophosphodiester pl   | 50         | 50         | 135.336487 |
| 66520     | 2610001J05Rik | RIKEN cDNA 2610001J        | 50         | 65.6613007 | 135.226395 |
| 22685     | Zfp239        | zinc finger protein 239    | 50         | 50         | 135.162292 |
| 71544     | Arhgap42      | Rho GTPase activating p    | 50         | 50         | 135.162292 |
| 229521    | Syt11         | synaptotagmin XI           | 50         | 50         | 134.924026 |
| 73451     | Zfp763        | zinc finger protein 763    | 50         | 54.2515984 | 134.621674 |
| 55979     | Agpat1        | 1-acylglycerol-3-phosph    | 50         | 50         | 134.534576 |

|              |               |                            |            |            |            |
|--------------|---------------|----------------------------|------------|------------|------------|
| 13175        | Delk1         | doublecortin-like kinase   | 50         | 50         | 134.220703 |
| 67071        | Rps6ka6       | ribosomal protein S6 kin   | 50         | 50         | 133.615982 |
| 68545        | Ecsr          | endothelial cell-specific  | 50         | 57.9227905 | 133.551895 |
| 71532        | 9030418K01Rik | RIKEN cDNA 9030418         | 50         | 54.8811493 | 132.988251 |
| 18378        | Omp           | olfactory marker protein   | 50         | 50.7034874 | 132.621811 |
| 26447        | Poli          | polymerase (DNA direct     | 50         | 50         | 132.459106 |
| 51801        | Ramp1         | receptor (calcitonin) acti | 50         | 50         | 132.186634 |
| 77744        | 6720463M24Rik | RIKEN cDNA 6720463         | 50         | 65.5509491 | 131.842896 |
| 733401504193 | NptxrlNpcd    | neuronal pentraxin recep   | 50         | 50         | 131.767303 |
| 68736        | 1110034B05Rik | RIKEN cDNA 1110034         | 50         | 50         | 131.709793 |
| 68980        | Wdr53         | WD repeat domain 53        | 50         | 50         | 131.627625 |
| 108812       | Als2cr12      | amyotrophic lateral scler  | 50         | 50         | 131.616119 |
| 68617        | 1110012J17Rik | RIKEN cDNA 1110012         | 50         | 50         | 131.593109 |
| 230996       | 9430015G10Rik | RIKEN cDNA 9430015         | 50         | 50         | 131.506027 |
| 68519        | Eml1          | echinoderm microtubule     | 50         | 57.3059731 | 130.988388 |
| 67463        | Poc5          | POC5 centriolar protein    | 50         | 50         | 130.523346 |
| 100503044    | A730020M07Rik | RIKEN cDNA A730020         | 50         | 50         | 130.360657 |
| 76813        | Armc6         | armadillo repeat containi  | 54.4140358 | 57.260704  | 129.884125 |
| 66548        | Adamts15      | ADAMTS-like 5              | 50         | 50         | 129.820023 |
| 13713        | Elk3          | ELK3, member of ETS c      | 50         | 50         | 129.593262 |
| 224111       | Ubxn7         | UBX domain protein 7       | 50         | 50         | 129.180801 |
| 14687        | Gnaz          | guanine nucleotide bindi   | 50         | 50         | 129.128204 |
| 71020        | Spats1        | spermatogenesis associat   | 50         | 61.6590576 | 129.116714 |
| 72661        | Serp2         | stress-associated endopla  | 50         | 50         | 128.96553  |
| 17930        | Myom2         | myomesin 2                 | 50         | 50         | 128.58757  |
| 70928        | Trim69        | tripartite motif-containin | 50         | 50         | 128.360809 |
| 100113398    | Adat3         | adenosine deaminase, tR    | 50         | 50         | 128.360809 |
| 67216        | Mboat2        | membrane bound O-acyl      | 50         | 50         | 128.122528 |
| 19726        | Rfx3          | regulatory factor X, 3 (in | 50         | 50         | 127.808662 |
| 237339       | L3mbtl3       | l(3)mbl-like 3 (Drosophi   | 50         | 56.0270691 | 127.494797 |
| 16578        | Kif9          | kinesin family member 9    | 50         | 62.0778198 | 126.965668 |
| 13640        | Efna5         | ephrin A5                  | 50         | 50         | 126.954163 |
| 69942        | Rnf113a1      | ring finger protein 113A   | 50         | 60.600853  | 126.878571 |
| 109168       | Atl3          | atlastin GTPase 3          | 50         | 50         | 126.878571 |
| 18452        | P4ha2         | procollagen-proline, 2-ox  | 50         | 50         | 126.867065 |
| 72371        | 2210408I21Rik | RIKEN cDNA 2210408         | 50         | 50         | 126.825989 |
| 14221        | Fjx1          | four jointed box 1 (Dros   | 50         | 50         | 126.402023 |
| 71176        | Fbxo24        | F-box protein 24           | 50         | 56.666523  | 126.273849 |
| 100216533    | Snord55       | small nucleolar RNA, C/    | 50         | 50         | 126.262344 |
| 70835        | Prss22        | protease, serine, 22       | 50         | 50         | 126.11116  |
| 19653        | Rbm4          | RNA binding motif prote    | 50         | 50         | 125.808807 |
| 66101        | Ppih          | peptidyl prolyl isomerase  | 50         | 50         | 125.646118 |
| 210035       | Tmem194       | transmembrane protein 1    | 50         | 52.8199043 | 125.181076 |
| 21819        | Tg            | thyroglobulin              | 50         | 50         | 125.169571 |
| 77286        | Nkrf          | NF-kappaB repressing fa    | 50         | 50         | 125.006889 |
| 385658       | Fam55c        | family with sequence sin   | 50         | 50         | 124.739029 |
| 109294       | Prex2         | phosphatidylinositol-3,4,  | 50         | 50         | 124.628937 |
| 73420        | 1700054N08Rik | RIKEN cDNA 1700054         | 50         | 50         | 124.349579 |
| 17196        | Mbp           | myelin basic protein       | 50         | 50         | 124.088295 |
| 70808        | 4632415L05Rik | RRS1 ribosome biogenes     | 50         | 50         | 123.884537 |
| 225182       | Rbbp8         | retinoblastoma binding p   | 50         | 50         | 123.861526 |
| 71934        | Car13         | carbonic anhydrase 13      | 50         | 50         | 123.570671 |
| 11982        | Atp10a        | ATPase, class V, type 10   | 50         | 50         | 123.105621 |
| 19725        | Rfx2          | regulatory factor X, 2 (in | 50         | 50         | 122.85585  |
| 19058        | Ppp3r1        | protein phosphatase 3, re  | 50         | 50         | 122.693161 |
| 70080        | 2210010C17Rik | RIKEN cDNA 2210010         | 50         | 50         | 122.663582 |
| 218397       | Rasa1         | RAS p21 protein activat    | 50         | 52.0474701 | 122.564987 |
| 24113        | Vax2          | ventral anterior homeobc   | 50         | 50         | 121.245438 |
| 226250       | Afap112       | actin filament associated  | 50         | 50         | 121.222435 |
| 20761        | Spr2g         | small proline-rich protein | 50         | 50         | 121.007172 |
| 12704        | Cit           | citron                     | 50         | 50         | 120.844482 |

|        |               |                            |            |            |            |
|--------|---------------|----------------------------|------------|------------|------------|
| 13527  | Dtna          | dystrobrevin alpha         | 50         | 50         | 120.757385 |
| 75871  | Zfp821        | zinc finger protein 821    | 50         | 50         | 120.681801 |
| 70645  | Oip5          | Opa interacting protein 5  | 50         | 50         | 120.303848 |
| 224014 | Fgd4          | FYVE, RhoGEF and PH        | 50         | 50         | 120.228256 |
| 76498  | Paqr4         | progesterin and adipoQ rec | 50         | 50         | 120.216751 |
| 209212 | Osgin2        | oxidative stress induced   | 50         | 59.2894058 | 119.850304 |
| 109294 | Prex2         | phosphatidylinositol-3,4,  | 50         | 50         | 119.838806 |
| 69234  | Zfp688        | zinc finger protein 688    | 50         | 53.5597992 | 118.943214 |
| 74051  | Steap2        | six transmembrane epithe   | 50         | 50         | 118.769035 |
| 74243  | 2210009G21Rik | RIKEN cDNA 2210009G        | 50         | 50         | 118.681938 |
| 242297 | Fam110b       | family with sequence sim   | 50         | 50         | 118.681938 |
| 21983  | Tpbg          | trophoblast glycoprotein   | 50         | 50         | 118.606354 |
| 74559  | Elov17        | ELOVL family member        | 50         | 50         | 118.466675 |
| 16196  | Il7           | interleukin 7              | 50         | 50         | 118.391083 |
| 72119  | Tpx2          | TPX2, microtubule-assoc    | 50         | 50         | 118.391083 |
| 18393  | Orc2          | origin recognition compl   | 50         | 50         | 118.29248  |
| 22070  | Tpt1          | tumor protein, translatio  | 50         | 50         | 118.141304 |
| 67803  | Limd2         | LIM domain containing 2    | 50         | 50         | 118.118301 |
| 12023  | Barx2         | BarH-like homeobox 2       | 50         | 50         | 117.815933 |
| 12064  | Bdnf          | brain derived neurotroph   | 50         | 50         | 117.618744 |
| 238799 | Tnpo1         | transportin 1              | 50         | 50         | 117.449486 |
| 68549  | Sgol2         | shugoshin-like 2 (S. pom   | 50         | 50         | 117.222717 |
| 234258 | Neil3         | nei like 3 (E. coli)       | 50         | 50         | 117.211212 |
| 192656 | Ripk2         | receptor (TNFRSF)-inter    | 50         | 50         | 117.037018 |
| 66296  | Haus2         | HAUS augmin-like comp      | 50         | 50         | 116.972939 |
| 18020  | Nfatc2ip      | nuclear factor of activate | 50         | 52.4336853 | 115.967255 |
| 54216  | Pcdh7         | protocadherin 7            | 50         | 50         | 115.967255 |
| 50762  | Fbxo6         | F-box protein 6            | 50         | 50         | 115.653397 |
| 320150 | Zdhhc17       | zinc finger, DHHC doma     | 50         | 50         | 115.135757 |
| 20166  | Rtkn          | rhotekin                   | 50         | 52.4336853 | 114.723297 |
| 22348  | Slc32a1       | solute carrier family 32 ( | 50         | 50         | 114.508026 |
| 18423  | Otx1          | orthodenticle homolog 1    | 50         | 50         | 114.420944 |
| 15331  | Hmgn2         | high mobility group nucl   | 50         | 50         | 114.333847 |
| 15245  | Hhip          | Hedgehog-interacting pro   | 55.6893158 | 50         | 114.281265 |
| 245469 | Pdzd4         | PDZ domain containing 4    | 50         | 50         | 113.717621 |
| 231503 | Tmem150c      | transmembrane protein 1    | 50         | 50         | 113.014297 |
| 208228 | Mob3a         | MOB kinase activator 3A    | 50         | 50         | 112.810532 |
| 73293  | Ccdc103       | coiled-coil domain conta   | 50         | 50         | 112.799026 |
| 23967  | Osr1          | odd-skipped related 1 (D   | 50         | 50         | 112.64785  |
| 270106 | Rpl13         | ribosomal protein L13      | 50         | 50         | 112.258392 |
| 12005  | Axin1         | axin 1                     | 50         | 50         | 112.1828   |
| 381073 | Npw           | neuropeptide W             | 50         | 50         | 112.171295 |
| 68800  | 1110059M19Rik | RIKEN cDNA 1110059M        | 50         | 50         | 111.81636  |
| 75782  | Lca5          | Leber congenital amauro    | 50         | 50         | 111.177124 |
| 213389 | Prdm9         | PR domain containing 9     | 50         | 50         | 111.101532 |
| 19240  | Tmsb10        | thymosin, beta 10          | 50         | 50         | 110.863258 |
| 56468  | Socs5         | suppressor of cytokine si  | 50         | 50         | 110.560898 |
| 225467 | Pggt1b        | protein geranylgeranyltra  | 50         | 50         | 110.398209 |
| 269224 | Pask          | PAS domain containing 5    | 50         | 50         | 110.031761 |
| 73720  | Cst6          | cystatin E/M               | 50         | 50         | 109.834564 |
| 105522 | Ankrd28       | ankyrin repeat domain 28   | 50         | 52.6770172 | 109.630806 |
| 26465  | Zfp146        | zinc finger protein 146    | 50         | 50         | 109.630806 |
| 99010  | Lpcat4        | lysophosphatidylcholine    | 50         | 50         | 109.555214 |
| 79456  | Recq4         | RecQ protein-like 4        | 50         | 50         | 109.252853 |
| 18181  | Nrf1          | nuclear respiratory factor | 50         | 50         | 109.252853 |
| 98488  | Gtf3c3        | general transcription fact | 50         | 50         | 108.950485 |
| 68876  | Xrcc6bp1      | XRCC6 binding protein      | 50         | 50         | 108.851891 |
| 69312  | Ppp1r42       | protein phosphatase 1, re  | 50         | 50         | 108.851891 |
| 12316  | Aspm          | asp (abnormal spindle)-li  | 50         | 50         | 108.590614 |
| 382090 | 4922501C03Rik | RIKEN cDNA 4922501C        | 50         | 50         | 108.450935 |
| 73467  | 1700066M21Rik | RIKEN cDNA 1700066M        | 50         | 50         | 108.398354 |

|           |               |                            |             |            |            |
|-----------|---------------|----------------------------|-------------|------------|------------|
| 73681     | Trmt11        | tRNA methyltransferase     | 53.7217407  | 50         | 108.13707  |
| 113853    | Vmn1r53       | vomeronal 1 receptor       | 50          | 50         | 107.933304 |
| 170763    | Zfp87         | zinc finger protein 87     | 50          | 50         | 107.706535 |
| 22696     | Zfp37         | zinc finger protein 37     | 50          | 50         | 107.381165 |
| 68659     | Fam198b       | family with sequence sim   | 50          | 50         | 107.317078 |
| 52665     | Echdc1        | enoyl Coenzyme A hydr      | 50          | 50         | 106.84053  |
| 16420     | Itgb6         | integrin beta 6            | 50          | 50         | 106.613754 |
| 212679    | Mars2         | methionine-tRNA synthe     | 50          | 50         | 106.375488 |
| 266690    | Cyb5r4        | cytochrome b5 reductase    | 50          | 50         | 106.322899 |
| 71710     | Lrrcc1        | leucine rich repeat and c  | 50          | 50         | 106.160217 |
| 76820     | Fam49a        | family with sequence sim   | 50          | 50         | 105.770767 |
| 13175     | Dclk1         | doublecortin-like kinase   | 50          | 50         | 105.497978 |
| 100900    | Hscb          | HscB iron-sulfur cluster   | 50          | 50         | 105.433884 |
| 12566     | Cdk2          | cyclin-dependent kinase    | 50          | 50         | 105.282715 |
| 20732     | Spint1        | serine protease inhibitor, | 50          | 50         | 105.055939 |
| 76507     | Abp1          | amiloride binding protein  | 50          | 50         | 105.055939 |
| 17279     | Melk          | maternal embryonic leuc    | 50          | 50         | 104.968842 |
| 101631    | Pwwp2b        | PWWP domain containin      | 50          | 50         | 104.852173 |
| 22367     | Vrk1          | vaccinia related kinase 1  | 50          | 50         | 104.765076 |
| 19279     | Ptprr         | protein tyrosine phosphat  | 50          | 50         | 104.590897 |
| 100217451 | Snora7a       | small nucleolar RNA, H     | 50          | 50         | 104.515305 |
| 65102     | Nif3l1        | Ngg1 interacting factor 3  | 50          | 50         | 104.428207 |
| 269437    | Plch1         | phospholipase C, eta 1     | 50          | 50         | 104.201431 |
| 30050     | Fbxw2         | F-box and WD-40 domain     | 50          | 50         | 104.178429 |
| 268465    | Eme1          | essential meiotic endonu   | 50          | 50         | 104.027252 |
| 74007     | Btbd11        | BTB (POZ) domain cont      | 50          | 50         | 103.899078 |
| 225289    | AW554918      | expressed sequence AW      | 50          | 50         | 103.445534 |
| 66660     | Sltm          | SAFB-like, transcription   | 50          | 50         | 103.381447 |
| 225998    | Rorb          | RAR-related orphan rece    | 50          | 50         | 103.218765 |
| 277328    | Trpa1         | transient receptor potenti | 50          | 50         | 103.143173 |
| 319859    | E030011O05Rik | RIKEN cDNA E030011O        | 50          | 50         | 102.980484 |
| 230967    | BC046331      | cDNA sequence BC0463       | 50          | 50         | 102.806297 |
| 12669     | Chrm1         | cholinergic receptor, mus  | 50          | 50         | 102.666626 |
| 78767     | 2610021K21Rik | RIKEN cDNA 2610021K        | 50          | 50         | 102.43985  |
| 15427     | Hoxc9         | homeobox C9                | 50          | 50         | 102.43985  |
| 209334    | Gen1          | Gen homolog 1, endonuc     | 50          | 50         | 102.428345 |
| 218311    | Zfp455        | zinc finger protein 455    | 50          | 50         | 102.35276  |
| 72022     | Slc35f2       | solute carrier family 35,  | 50          | 50         | 102.254166 |
| 11537     | Cfd           | complement factor D (ad    | 50          | 50         | 102.147346 |
| 19383     | Raly          | hnRNP-associated with l    | 50          | 50         | 101.736526 |
| 76072     | Rnf183        | ring finger protein 183    | 50          | 50         | 101.725029 |
| 387524    | Znrf2         | zinc and ring finger 2     | 50          | 50         | 101.49826  |
| 667063    | Gm8439        | predicted gene 8439        | 50          | 50         | 100.615822 |
| 71177     | 4933424B01Rik | RIKEN cDNA 4933424         | 50          | 50         | 100.492577 |
| 270097    | Vat1l         | vesicle amine transport p  | 50          | 50         | 100.42849  |
| 74320     | Wdr33         | WD repeat domain 33        | 50          | 50         | 100.42849  |
| 71361     | Aifm2         | apoptosis-inducing factor  | 50          | 50         | 100.265808 |
| 71760     | Agxt2l1       | alanine-glyoxylate aminc   | 1141.25317  | 1633.60291 | 50         |
| 18171     | Nr1i2         | nuclear receptor subfami   | 529.233032  | 578.67334  | 50         |
| 14120     | Fbp2          | fructose bisphosphatase    | 2103.608139 | 101.559761 | 50         |
| 18670     | Abcb4         | ATP-binding cassette, su   | 23244.5625  | 18359.5586 | 50         |
| 246278    | Cd207         | CD207 antigen              | 652.272949  | 448.203827 | 50         |
| 18383     | Tnfrsf11b     | tumor necrosis factor rec  | 114.93515   | 107.071503 | 50         |
| 26876     | Adh4          | alcohol dehydrogenase 4    | 4548.24072  | 3390.19434 | 50         |
| 18815     | Plg           | plasminogen                | 37147.4453  | 38324.5977 | 50         |
| 100038347 | Fam174b       | family with sequence sim   | 178.564484  | 248.411713 | 50         |
| 232714    | Mgam          | maltase-glucoamylase       | 737.938477  | 619.775146 | 50         |
| 23923     | Aadat         | aminoadipate aminotrans    | 6195.4043   | 5038.36865 | 50         |
| 73644     | 2210039B01Rik | RIKEN cDNA 2210039         | 266.984894  | 242.338318 | 50         |
| 14317     | Ftcd          | formiminotransferase cyc   | 18980.9883  | 19433.0449 | 50         |
| 20493     | Slc10a1       | solute carrier family 10 ( | 144.832138  | 145.485336 | 50         |

Pattern II -Down



|        |               |                             |            |            |    |
|--------|---------------|-----------------------------|------------|------------|----|
| 18762  | Prkez         | protein kinase C, zeta      | 311.038269 | 322.52594  | 50 |
| 11699  | Ambp          | alpha 1 microglobulin/bi    | 12280.5703 | 12746.127  | 50 |
| 69861  | 2010003K11Rik | RIKEN cDNA 2010003K11       | 1053.59302 | 1044.22729 | 50 |
| 216166 | Plk5          | polo-like kinase 5 (Dros    | 128.259842 | 174.55072  | 50 |
| 15360  | Hmgcs2        | 3-hydroxy-3-methylgluta     | 43320.8672 | 31370.6426 | 50 |
| 67260  | Lass4         | LAG1 homolog, ceramid       | 130.884857 | 189.122314 | 50 |
| 104816 | Aspg          | asparaginase homolog (S     | 504.999573 | 700.176392 | 50 |
| 74374  | Clec16a       | C-type lectin domain fan    | 160.75174  | 209.182999 | 50 |
| 272538 | Tmco7         | transmembrane and coile     | 154.465652 | 212.666046 | 50 |
| 170757 | Eltl1         | EGF, latrophilin seven tr   | 692.18689  | 1010.27686 | 50 |
| 22413  | Wnt2          | wingless-related MMTV       | 309.214874 | 326.008972 | 50 |
| 50500  | Ttpa          | tocopherol (alpha) transf   | 1877.34912 | 1559.39111 | 50 |
| 22035  | Tnfsf10       | tumor necrosis factor (lig  | 118.730896 | 121.367233 | 50 |
| 27276  | Plekhb1       | pleckstrin homology dom     | 4014.43701 | 2767.56982 | 50 |
| 64381  | Ms4a8a        | membrane-spanning 4-d       | 157.334625 | 213.107422 | 50 |
| 67477  | Abhd15        | abhydrolase domain cont     | 494.912994 | 376.271088 | 50 |
| 69865  | A1cf          | APOBEC1 complementa         | 1454.63281 | 1512.0603  | 50 |
| 11826  | Aqp1          | aquaporin 1                 | 1022.30841 | 1308.35645 | 50 |
| 108000 | Cenpf         | centromere protein F        | 135.582001 | 134.78299  | 50 |
| 117147 | Acsml         | acyl-CoA synthetase me      | 1295.39563 | 1872.73413 | 50 |
| 234353 | Psd3          | pleckstrin and Sec7 dom     | 130.297119 | 106.542397 | 50 |
| 108114 | Slc22a7       | solute carrier family 22 (  | 248.261261 | 278.204254 | 50 |
| 14198  | Fhit          | fragile histidine triad gen | 495.017578 | 359.518005 | 50 |
| 14618  | Gjb1          | gap junction protein, beta  | 4024.8501  | 4184.51758 | 50 |
| 75847  | Ispd          | isoprenoid synthase dom     | 284.662964 | 229.419128 | 50 |
| 64075  | Smoc1         | SPARC related modular       | 4029.05786 | 5223.9248  | 50 |
| 26459  | Slc27a5       | solute carrier family 27 (  | 4516.96387 | 4915.38867 | 50 |
| 78057  | 4930583I09Rik | RIKEN cDNA 4930583I09       | 318.146576 | 262.752716 | 50 |
| 66825  | Rnf186        | ring finger protein 186     | 750.322144 | 757.690308 | 50 |
| 230558 | C8a           | complement component 8      | 1859.17371 | 2028.58228 | 50 |
| 330166 | Miat          | myocardial infarction ass   | 276.3396   | 342.885162 | 50 |
| 15112  | Hao1          | hydroxyacid oxidase 1, h    | 4376.65137 | 5871.02246 | 50 |
| 11818  | Apoh          | apolipoprotein H            | 11227.9082 | 15509.0996 | 50 |
| 76654  | Upp2          | uridine phosphorylase 2     | 778.927979 | 988.706665 | 50 |
| 14121  | Fbp1          | fructose biphosphatase 1    | 14388.4795 | 11550.7891 | 50 |
| 76559  | Atg2b         | ATG2 autophagy related      | 113.206802 | 134.263794 | 50 |
| 53872  | Caprin1       | cell cycle associated prot  | 141.823746 | 146.387924 | 50 |
| 234199 | Fgl1          | fibrinogen-like protein 1   | 15284.9863 | 21015.8398 | 50 |
| 18979  | Pon1          | paraoxonase 1               | 49672.668  | 39213.1484 | 50 |
| 244416 | Ppp1r3b       | protein phosphatase 1, re   | 2863.70264 | 2437.42017 | 50 |
| 217721 | Mfsd7c        | major facilitator superfar  | 162.654373 | 216.028824 | 50 |
| 14547  | Gdap2         | ganglioside-induced diff    | 213.298004 | 206.4823   | 50 |
| 16912  | Psmb9         | proteasome (prosome, m      | 780.038574 | 843.784363 | 50 |
| 218865 | Chdh          | choline dehydrogenase       | 1662.44165 | 2009.33936 | 50 |
| 22262  | Uox           | urate oxidase               | 12504.1201 | 12981.9727 | 50 |
| 12165  | Gdf2          | growth differentiation fac  | 531.430298 | 717.059631 | 50 |
| 54140  | Avpr1a        | arginine vasopressin rece   | 683.907837 | 559.560486 | 50 |
| 320440 | 9530091C08Rik | RIKEN cDNA 9530091C08       | 269.052277 | 332.380859 | 50 |
| 12611  | Cebpg         | CCAAT/enhancer bindin       | 126.287521 | 164.585449 | 50 |
| 55985  | Cxcl13        | chemokine (C-X-C motif      | 153.778107 | 136.886688 | 50 |
| 234878 | BC021891      | cDNA sequence BC021891      | 330.265686 | 295.531738 | 50 |
| 74637  | Shpk          | sedoheptulokinase           | 306.998596 | 272.572266 | 50 |
| 27413  | Abcb11        | ATP-binding cassette, su    | 6217.62109 | 5074.75977 | 50 |
| 212965 | BC024386      | cDNA sequence BC024386      | 9567.01367 | 8524.57422 | 50 |
| 18551  | Pcsk4         | proprotein convertase su    | 179.774811 | 213.834595 | 50 |
| 79235  | Lrat          | lecithin-retinol acyltransf | 345.901733 | 366.945251 | 50 |
| 16918  | Mycl1         | v-myc myelocytomatosis      | 372.625549 | 356.32074  | 50 |
| 67473  | Slc47a1       | solute carrier family 47,   | 5141.84766 | 4589.18652 | 50 |
| 15160  | Serpind1      | serine (or cysteine) pepti  | 3774.02539 | 4364.03223 | 50 |
| 22139  | Trt           | transthyretin               | 43707.8125 | 56918.5312 | 50 |
| 71776  | Tha1          | threonine aldolase 1        | 201.971008 | 219.466583 | 50 |

|        |               |                            |            |            |    |
|--------|---------------|----------------------------|------------|------------|----|
| 13106  | Cyp2e1        | cytochrome P450, family    | 33193.5547 | 33997.9375 | 50 |
| 243537 | Uroc1         | urocanase domain containi  | 10726.1807 | 9933.13672 | 50 |
| 239037 | Lrit1         | leucine-rich repeat, immu  | 796.134033 | 533.108093 | 50 |
| 72107  | Dscc1         | defective in sister chrom  | 395.583771 | 293.295044 | 50 |
| 71775  | 1300017J02Rik | RIKEN cDNA 1300017J        | 11207.3037 | 11010.0908 | 50 |
| 71902  | Cand1         | cullin associated and ned  | 108.683914 | 106.035927 | 50 |
| 15109  | Hal           | histidine ammonia lyase    | 5785.76709 | 6030.59814 | 50 |
| 75957  | Mir17hg       | MIR17 host gene 1 (non-    | 129.818695 | 132.676483 | 50 |
| 13082  | Cyp26a1       | cytochrome P450, family    | 369.69165  | 377.394348 | 50 |
| 103655 | Sec14l4       | SEC14-like 4 (S. cerevis   | 8139.44189 | 10322.5332 | 50 |
| 12352  | Car5a         | carbonic anhydrase 5a, m   | 3386.45801 | 4703.62109 | 50 |
| 110446 | Acat1         | acetyl-Coenzyme A acety    | 494.987427 | 403.420929 | 50 |
| 15139  | Hc            | hemolytic complement       | 11510.5723 | 16217.3984 | 50 |
| 71724  | Aox3          | aldehyde oxidase 3         | 3931.23828 | 5579.85059 | 50 |
| 16790  | Anpep         | alanyl (membrane) amin     | 163.650818 | 154.291962 | 50 |
| 75462  | 1700001C19Rik | RIKEN cDNA 1700001C        | 227.345093 | 184.723938 | 50 |
| 71756  | Cpn2          | carboxypeptidase N, poly   | 4499.86523 | 5024.61621 | 50 |
| 16995  | Ltb4r1        | leukotriene B4 receptor    | 121.873947 | 165.214996 | 50 |
| 99586  | Dpyd          | dihydropyrimidine dehyd    | 6072.52246 | 4569.70703 | 50 |
| 20672  | Sox18         | SRY-box containing gen     | 109.620171 | 100.280853 | 50 |
| 11607  | Agtr1a        | angiotensin II receptor, t | 639.596191 | 929.134277 | 50 |
| 237758 | Zfp454        | zinc finger protein 454    | 121.664825 | 129.446686 | 50 |
| 212980 | Slc45a3       | solute carrier family 45,  | 361.582123 | 530.189514 | 50 |
| 104158 | Ces1d         | carboxylesterase 1D        | 15496.9414 | 10711.0664 | 50 |
| 14164  | Fgf1          | fibroblast growth factor   | 479.69043  | 364.322388 | 50 |
| 233058 | Zfp420        | zinc finger protein 420    | 119.557846 | 134.043091 | 50 |
| 103149 | Upb1          | ureidopropionase, beta     | 6929.81934 | 6980.72559 | 50 |
| 212892 | Rsph4a        | radial spoke head 4 hom    | 144.662628 | 101.196182 | 50 |
| 17175  | Masp2         | mannan-binding lectin se   | 960.416992 | 1321.03809 | 50 |
| 13123  | Cyp7b1        | cytochrome P450, family    | 614.710083 | 755.849792 | 50 |
| 268756 | Gulo          | gulonolactone (L-) oxida   | 4376.4502  | 5662.58887 | 50 |
| 11812  | Apoc1         | apolipoprotein C-I         | 44939.2422 | 59389.4258 | 50 |
| 16424  | Itih1         | inter-alpha trypsin inhibi | 16600.584  | 18281.1211 | 50 |
| 28253  | Slco1b2       | solute carrier organic ani | 37855.9453 | 33193.5    | 50 |
| 26930  | Ppnr          | per-pentamer repeat gene   | 725.819336 | 815.934204 | 50 |
| 30924  | Angptl3       | angiopoietin-like 3        | 4487.88086 | 5351.78809 | 50 |
| 19647  | Rbbp6         | retinoblastoma binding p   | 133.918594 | 126.768616 | 50 |
| 66107  | 1100001G20Rik | RIKEN cDNA 1100001G        | 13160.2061 | 12197.0547 | 50 |
| 13009  | Csrp3         | cysteine and glycine-rich  | 880.8078   | 1075.52222 | 50 |
| 14061  | F2            | coagulation factor II      | 24353.9277 | 31468.9766 | 50 |
| 54326  | Elov12        | elongation of very long c  | 5408.18164 | 4932.35986 | 50 |
| 15233  | Hgd           | homogentisate 1, 2-dioxy   | 4138.99463 | 5917.04736 | 50 |
| 20872  | Stk16         | serine/threonine kinase 1  | 226.966476 | 176.97554  | 50 |
| 217316 | Slc16a5       | solute carrier family 16   | 994.653076 | 1444.38586 | 50 |
| 20304  | Ccl5          | chemokine (C-C motif) l    | 108.305283 | 150.377426 | 50 |
| 16596  | Klf1          | Kruppel-like factor 1 (er  | 141.863342 | 121.367233 | 50 |
| 52685  | Cd300lg       | CD300 antigen like fami    | 172.352844 | 186.062256 | 50 |
| 16011  | Igfbp5        | insulin-like growth facto  | 308.757019 | 362.095612 | 50 |
| 236920 | Stard8        | START domain containi      | 607.989868 | 718.682251 | 50 |
| 230163 | Aldob         | aldolase B, fructose-bisp  | 16058.3555 | 21430.3203 | 50 |
| 18573  | Pde1a         | phosphodiesterase 1A, c    | 286.551331 | 193.309875 | 50 |
| 329251 | Ppp1r12b      | protein phosphatase 1, re  | 108.40509  | 161.939911 | 50 |
| 243168 | Hsd17b13      | hydroxysteroid (17-beta)   | 179.839752 | 215.421906 | 50 |
| 14130  | Fcgr2b        | Fc receptor, IgG, low aff  | 463.492004 | 682.073608 | 50 |
| 76263  | Gstk1         | glutathione S-transferase  | 7946.54053 | 5457.95166 | 50 |
| 18703  | Pigr          | polymeric immunoglobul     | 22524.6816 | 19294.6367 | 50 |
| 237320 | Aldh8a1       | aldehyde dehydrogenase     | 3541.88672 | 3345.83447 | 50 |
| 74519  | Cyp2j9        | cytochrome P450, family    | 493.284424 | 413.834656 | 50 |
| 330938 | Dixdc1        | DIX domain containing      | 591.308228 | 794.581909 | 50 |
| 11536  | Gpr182        | G protein-coupled recept   | 377.680756 | 520.691162 | 50 |
| 20743  | Spnb3         | spectrin beta 3            | 895.821289 | 1059.56836 | 50 |

|        |               |                            |            |            |    |
|--------|---------------|----------------------------|------------|------------|----|
| 226143 | Cyp2c44       | cytochrome P450, family    | 3632.66919 | 2482.27661 | 50 |
| 20317  | Serpinf1      | serine (or cysteine) pepti | 19642.5957 | 18500.1953 | 50 |
| 210108 | D130043K22Rik | RIKEN cDNA D130043         | 430.779907 | 588.041626 | 50 |
| 668253 | Dleu2         | deleted in lymphocytic le  | 335.122864 | 228.406189 | 50 |
| 76257  | Slc38a3       | solute carrier family 38,  | 2500.53467 | 2626.40527 | 50 |
| 56508  | Rapgef4       | Rap guanine nucleotide e   | 363.654236 | 419.612366 | 50 |
| 102141 | Snx25         | sorting nexin 25           | 505.57782  | 487.585327 | 50 |
| 11814  | Apoc3         | apolipoprotein C-III       | 18147.2363 | 24045.1055 | 50 |
| 72090  | Entpd8        | ectonucleoside triphosph   | 244.400574 | 220.888382 | 50 |
| 76654  | Upp2          | uridine phosphorylase 2    | 1723.55518 | 2082.40381 | 50 |
| 19130  | Prox1         | prospero-related homeob    | 302.470947 | 367.850708 | 50 |
| 218103 | Slc17a2       | solute carrier family 17 ( | 1605.58008 | 1156.63501 | 50 |
| 230678 | Tmem125       | transmembrane protein 1    | 174.942993 | 141.109619 | 50 |
| 17858  | Mx2           | myxovirus (influenza vir   | 277.789124 | 189.011963 | 50 |
| 66901  | Proz          | protein Z, vitamin K-dep   | 992.755127 | 1137.65234 | 50 |
| 76654  | Upp2          | uridine phosphorylase 2    | 1460.32007 | 1712.69556 | 50 |
| 19699  | Reln          | reelin                     | 1631       | 1540.87244 | 50 |
| 57757  | Pglyrp2       | peptidoglycan recognitio   | 460.323608 | 636.485779 | 50 |
| 13982  | Esr1          | estrogen receptor 1 (alph  | 1560.07861 | 2126.44678 | 50 |
| 17761  | Mtap7         | microtubule-associated p   | 199.490143 | 222.926987 | 50 |
| 13195  | Ddc           | dopa decarboxylase         | 1013.37512 | 1228.68811 | 50 |
| 11536  | Gpr182        | G protein-coupled recept   | 296.294128 | 362.040436 | 50 |
| 19228  | Pth1r         | parathyroid hormone 1 re   | 128.812729 | 143.070404 | 50 |
| 70373  | 1700020O03Rik | RIKEN cDNA 1700020         | 120.668365 | 140.051407 | 50 |
| 26458  | Slc27a2       | solute carrier family 27 ( | 40538.6953 | 30344.6699 | 50 |
| 18534  | Pck1          | phosphoenolpyruvate car    | 29267.418  | 40259.2969 | 50 |
| 170442 | Bbox1         | butyrobetaine (gamma),     | 6385.625   | 4260.0293  | 50 |
| 93841  | Uchl4         | ubiquitin carboxyl-termin  | 1487.69189 | 1577.74426 | 50 |
| 20678  | Sox5          | SRY-box containing gen     | 739.761902 | 864.758972 | 50 |
| 433855 | AI506816      | expressed sequence AI50    | 135.133682 | 100.215775 | 50 |
| 68910  | Zfp467        | zinc finger protein 467    | 271.577515 | 332.919861 | 50 |
| 20493  | Slc10a1       | solute carrier family 10 ( | 148.46312  | 132.280365 | 50 |
| 17289  | Mertk         | c-mer proto-oncogene ty    | 581.932983 | 779.711792 | 50 |
| 224860 | Plcl2         | phospholipase C-like 2     | 125.360764 | 136.941864 | 50 |
| 269423 | 3110057O12Rik | RIKEN cDNA 3110057         | 197.13443  | 194.897186 | 50 |
| 72792  | 2810459M11Rik | RIKEN cDNA 2810459         | 1282.34497 | 1052.58691 | 50 |
| 16427  | Itih4         | inter alpha-trypsin inhibi | 3410.01489 | 4571.86035 | 50 |
| 625098 | Slc38a6       | solute carrier family 38,  | 226.448441 | 336.402924 | 50 |
| 66451  | 2610528J11Rik | RIKEN cDNA 2610528         | 128.473724 | 147.270706 | 50 |
| 225884 | BC021614      | cDNA sequence BC0216       | 1090.12622 | 1614.26514 | 50 |
| 12359  | Cat           | catalase                   | 174.455048 | 150.565582 | 50 |
| 22354  | Vipr1         | vasoactive intestinal pep  | 652.875    | 550.390259 | 50 |
| 14161  | Fga           | fibrinogen alpha chain     | 1399.69922 | 1804.78381 | 50 |
| 59083  | Fetub         | fetuin beta                | 10194.5391 | 14402.6641 | 50 |
| 14068  | F7            | coagulation factor VII     | 955.160522 | 1249.17603 | 50 |
| 102022 | Ces2a         | carboxylesterase 2A        | 1363.98022 | 1598.28308 | 50 |
| 225631 | Onecut2       | one cut domain, family n   | 168.347977 | 167.662445 | 50 |
| 235106 | Ntm           | neurotrimin                | 130.780304 | 189.034592 | 50 |
| 53321  | Cntnap1       | contactin associated prot  | 412.818268 | 276.561768 | 50 |
| 27421  | Abcc6         | ATP-binding cassette, su   | 166.101593 | 177.637634 | 50 |
| 11816  | Apoe          | apolipoprotein E           | 25954.0176 | 32831.4883 | 50 |
| 16000  | Igf1          | insulin-like growth facto  | 1919.77722 | 1499.06616 | 50 |
| 21834  | Thrb          | thyroid hormone recepto    | 228.769287 | 257.857788 | 50 |
| 13435  | Dnmt3a        | DNA methyltransferase 3    | 106.995155 | 146.046982 | 50 |
| 228357 | Lrp4          | low density lipoprotein r  | 179.047653 | 149.861053 | 50 |
| 66175  | Mustn1        | musculoskeletal, embryo    | 174.803589 | 233.067688 | 50 |
| 20183  | Rxrg          | retinoid X receptor gamr   | 163.615982 | 135.883636 | 50 |
| 228993 | Slc17a9       | solute carrier family 17,  | 263.711975 | 385.275757 | 50 |
| 217692 | Sipa1l1       | signal-induced proliferati | 255.348969 | 268.858643 | 50 |
| 16542  | Kdr           | kinase insert domain pro   | 401.770081 | 319.218323 | 50 |
| 13074  | Cyp17a1       | cytochrome P450, family    | 2340.36279 | 2131.39673 | 50 |

|        |               |                             |            |            |    |
|--------|---------------|-----------------------------|------------|------------|----|
| 21835  | Thrsp         | thyroid hormone respons     | 2173.34399 | 2119.21631 | 50 |
| 16917  | Lmx1b         | LIM homeobox transcrip      | 4518.52588 | 6406.38281 | 50 |
| 11848  | Rhoa          | ras homolog gene family     | 23641.4297 | 28182.9023 | 50 |
| 16782  | Lamc2         | laminin, gamma 2            | 322.664734 | 284.709137 | 50 |
| 68509  | Ptx4          | pentraxin 4                 | 396.429749 | 283.904175 | 50 |
| 239789 | Gm606         | predicted gene 606          | 296.229187 | 258.133667 | 50 |
| 13819  | Epas1         | endothelial PAS domain      | 4080.67896 | 6061.76855 | 50 |
| 13609  | S1pr1         | sphingosine-1-phosphate     | 788.875244 | 733.893372 | 50 |
| 230766 | Fam167b       | family with sequence sin    | 150.256439 | 176.005035 | 50 |
| 240327 | Gm4951        | predicted gene 4951         | 684.685669 | 891.334473 | 50 |
| 70456  | Brp44         | brain protein 44            | 290.730469 | 202.414993 | 50 |
| 69291  | 1700001L05Rik | RIKEN cDNA 1700001L         | 339.8992   | 280.872406 | 50 |
| 94175  | Hrg           | histidine-rich glycoprote   | 6524.44727 | 8965.70703 | 50 |
| 240752 | Pik3c2b       | phosphoinositide-3-kinas    | 151.013672 | 187.051163 | 50 |
| 192216 | Tmem47        | transmembrane protein 4     | 116.454399 | 154.269318 | 50 |
| 380713 | Scarf1        | scavenger receptor class    | 120.145584 | 170.042007 | 50 |
| 216198 | Tcp11l2       | t-complex 11 (mouse) lik    | 189.642761 | 221.758423 | 50 |
| 54604  | Penx          | pecanex homolog (Drosop     | 191.680054 | 169.171967 | 50 |
| 26464  | Vnn3          | vanin 3                     | 1400.89209 | 1141.03491 | 50 |
| 11889  | Asgr1         | asialoglycoprotein recept   | 4824.38525 | 4231.11963 | 50 |
| 13101  | Cyp2d10       | cytochrome P450, family     | 4970.7998  | 5127.66895 | 50 |
| 11988  | Slc7a2        | solute carrier family 7 (c  | 1798.18677 | 2369.44287 | 50 |
| 21789  | Tfpi2         | tissue factor pathway inh   | 1107.24829 | 852.001038 | 50 |
| 327956 | Vmo1          | vitelline membrane outer    | 158.988525 | 134.263794 | 50 |
| 13998  | Fgd6          | FYVE, RhoGEF and PH         | 185.847031 | 265.826904 | 50 |
| 217593 | Slc25a21      | solute carrier family 25 (c | 388.152283 | 273.046204 | 50 |
| 214547 | She           | src homology 2 domain-c     | 101.471054 | 147.942703 | 50 |
| 212933 | Pm20d1        | peptidase M20 domain c      | 1500.18018 | 2087.46143 | 50 |
| 20717  | Serpina3m     | serine (or cysteine) pepti  | 2577.9624  | 3193.72974 | 50 |
| 13143  | Dapk2         | death-associated protein    | 102.1586   | 149.25415  | 50 |
| 235386 | Agphd1        | aminoglycoside phospho      | 641.761841 | 560.0401   | 50 |
| 56189  | Prodh2        | proline dehydrogenase (c    | 880.278687 | 633.547424 | 50 |
| 11287  | Pzp           | pregnancy zone protein      | 19714.3457 | 27766.7148 | 50 |
| 230857 | Ece1          | endothelin converting en    | 288.797729 | 313.533997 | 50 |
| 232493 | Gys2          | glycogen synthase 2         | 1600.20166 | 1900.78516 | 50 |
| 19208  | Ptcra         | pre T cell antigen recept   | 495.296387 | 482.086304 | 50 |
| 435684 | Shf           | Src homology 2 domain       | 185.368607 | 215.168671 | 50 |
| 67217  | 2810055F11Rik | RIKEN cDNA 2810055F         | 354.085693 | 270.676544 | 50 |
| 11625  | Ahsg          | alpha-2-HS-glycoprotein     | 29315.4219 | 38903.0938 | 50 |
| 240638 | Slc16a12      | solute carrier family 16 (c | 762.187805 | 811.402954 | 50 |
| 11890  | Asgr2         | asialoglycoprotein recept   | 12120.5605 | 12896.8262 | 50 |
| 66968  | Plin5         | perilipin 5                 | 2024.27734 | 1484.61475 | 50 |
| 20714  | Serpina3k     | serine (or cysteine) pepti  | 7551.63623 | 9635.15234 | 50 |
| 257633 | Acsf3         | acyl-CoA synthetase fam     | 123.702103 | 153.376633 | 50 |
| 231103 | Gckr          | glucokinase regulatory p    | 6181.71094 | 9183.13672 | 50 |
| 53376  | Usp2          | ubiquitin specific peptida  | 225.661102 | 248.411713 | 50 |
| 384059 | Tlr12         | toll-like receptor 12       | 1510.20654 | 1463.53406 | 50 |
| 107526 | Gimap4        | GTPase, IMAP family m       | 166.68457  | 233.245941 | 50 |
| 14067  | F5            | coagulation factor V        | 6222.18164 | 7037.0708  | 50 |
| 231510 | Agpat9        | 1-acylglycerol-3-phospha    | 161.329987 | 115.767776 | 50 |
| 242341 | Atp6v0d2      | ATPase, H+ transporting     | 174.21109  | 260.581116 | 50 |
| 230801 | Pigv          | phosphatidylinositol gly    | 152.323822 | 138.19812  | 50 |
| 12038  | Bche          | butyrylcholinesterase       | 4352.04395 | 4870.99219 | 50 |
| 243374 | Gimap8        | GTPase, IMAP family m       | 158.50061  | 176.699677 | 50 |
| 20503  | Slc16a7       | solute carrier family 16 (c | 1177.22241 | 1259.8374  | 50 |
| 71985  | Acad10        | acyl-Coenzyme A dehyd       | 190.209915 | 161.566437 | 50 |
| 72094  | Ugt2a3        | UDP glucuronosyltransfe     | 878.261963 | 666.368896 | 50 |
| 15007  | H2-Q10        | histocompatibility 2, Q r   | 14312.7246 | 20517.7461 | 50 |
| 17777  | Mttp          | microsomal triglyceride t   | 1795.9895  | 2051.12305 | 50 |
| 240328 | F830016B08Rik | RIKEN cDNA F830016B         | 282.994812 | 195.416382 | 50 |
| 56188  | Fxyd1         | FXDYD domain-containin      | 9786.4248  | 13813.876  | 50 |

|        |          |                            |            |            |    |
|--------|----------|----------------------------|------------|------------|----|
| 14160  | Lgr5     | leucine rich repeat conta  | 383.09079  | 428.283203 | 50 |
| 13108  | Cyp2g1   | cytochrome P450, family    | 458.270508 | 330.527588 | 50 |
| 192653 | Ttc36    | tetratricopeptide repeat d | 6484.11035 | 6464.82715 | 50 |
| 68312  | Gstm7    | glutathione S-transferase  | 296.782104 | 391.981506 | 50 |
| 14453  | Gas2     | growth arrest specific 2   | 323.954254 | 279.064392 | 50 |
| 52815  | Ldhd     | lactate dehydrogenase D    | 313.832825 | 360.388062 | 50 |
| 27400  | Hsd17b6  | hydroxysteroid (17-beta)   | 3615.07666 | 4608.46436 | 50 |
| 69721  | Nkiras1  | NFKB inhibitor interacti   | 110.51207  | 129.027924 | 50 |
| 11905  | Serpinc1 | serine (or cysteine) pepti | 945.294189 | 1365.68799 | 50 |
| 320011 | Uggt1    | UDP-glucose glycoprote     | 269.819031 | 284.962341 | 50 |
| 52076  | Tmem38b  | transmembrane protein 3    | 135.995483 | 144.712891 | 50 |
| 101613 | Nlrp6    | NLR family, pyrin doma     | 1084.46277 | 1198.96777 | 50 |
| 13077  | Cyp1a2   | cytochrome P450, family    | 7650.71387 | 8798.42871 | 50 |
| 66112  | Mosc1    | MOCO sulphurase C-ter      | 2366.09961 | 2620.50146 | 50 |
| 381626 | Rbm33    | RNA binding motif prote    | 375.529419 | 418.27829  | 50 |
| 194590 | Reps2    | RALBP1 associated Eps      | 220.171844 | 314.02774  | 50 |
| 20216  | Acsm3    | acyl-CoA synthetase mec    | 286.282013 | 425.838562 | 50 |
| 14411  | Slc6a12  | solute carrier family 6 (n | 516.152344 | 705.224121 | 50 |
| 14080  | Fabp1    | fatty acid binding protein | 38064.7266 | 39394.5312 | 50 |
| 74318  | Hopx     | HOP homeobox               | 1222.28967 | 1506.62915 | 50 |
| 12583  | Cdo1     | cysteine dioxygenase 1, c  | 13340.709  | 19445.1484 | 50 |
| 239102 | Zfhx2    | zinc finger homeobox 2     | 115.109421 | 108.548462 | 50 |
| 16562  | Kif1c    | kinesin family member 1    | 100.639351 | 123.957581 | 50 |
| 12124  | Bik      | BCL2-interacting killer    | 198.145157 | 268.618134 | 50 |
| 320311 | Rnf152   | ring finger protein 152    | 215.156281 | 159.979126 | 50 |
| 16597  | Klf12    | Kruppel-like factor 12     | 175.904602 | 245.204559 | 50 |
| 26874  | Abcd2    | ATP-binding cassette, su   | 330.300537 | 277.412018 | 50 |
| 107526 | Gimap4   | GTPase, IMAP family m      | 101.784729 | 122.250008 | 50 |
| 70772  | Ggnbp1   | gametogenetin binding p    | 173.21463  | 184.889465 | 50 |
| 71687  | Tmem25   | transmembrane protein 2    | 1278.73291 | 1689.51257 | 50 |
| 27376  | Slc25a10 | solute carrier family 25 ( | 195.6548   | 184.590973 | 50 |
| 140792 | Colec12  | collectin sub-family mem   | 141.693848 | 155.626038 | 50 |
| 58909  | Fam13a   | family with sequence sim   | 148.17955  | 207.650864 | 50 |
| 12012  | Baat     | bile acid-Coenzyme A: a    | 1881.7041  | 1957.8562  | 50 |
| 106648 | Cyp4f15  | cytochrome P450, family    | 4261.14258 | 5181.50977 | 50 |
| 214579 | Aldh5a1  | aldehyde dehydrogenas      | 290.077759 | 236.099426 | 50 |
| 11302  | Aatk     | apoptosis-associated tyro  | 158.709717 | 161.654144 | 50 |
| 98496  | Pid1     | phosphotyrosine interact   | 681.791321 | 989.882324 | 50 |
| 102103 | Mtus1    | mitochondrial tumor sup    | 837.316772 | 856.727661 | 50 |
| 70789  | Kynu     | kynureninase (L-kynuren    | 813.97522  | 899.933105 | 50 |
| 108151 | Sema3d   | sema domain, immunogl      | 134.336838 | 134.341599 | 50 |
| 68126  | Fahd2a   | fumarylacetoacetate hydr   | 120.872726 | 135.322006 | 50 |
| 11522  | Adh1     | alcohol dehydrogenase 1    | 22533.6953 | 29724.9805 | 50 |
| 236149 | Slc22a26 | solute carrier family 22 ( | 943.480286 | 639.011047 | 50 |
| 14060  | F13b     | coagulation factor XIII, b | 9056.43164 | 11122.6514 | 50 |
| 319848 | Slc17a4  | solute carrier family 17 ( | 208.461456 | 203.219971 | 50 |
| 268860 | Abat     | 4-aminobutyrate aminotr    | 1993.90186 | 2420.43213 | 50 |
| 217258 | Abca8a   | ATP-binding cassette, su   | 299.850677 | 398.172302 | 50 |
| 320405 | Cadps2   | Ca2+-dependent activato    | 145.86821  | 186.321167 | 50 |
| 68350  | Mul1     | mitochondrial ubiquitin l  | 130.954575 | 185.418579 | 50 |
| 98256  | Kmo      | kynurenine 3-monooxyge     | 6313.77051 | 7298.96191 | 50 |
| 75396  | Spp2     | secreted phosphoprotein    | 5205.94141 | 6529.77832 | 50 |
| 280662 | Afm      | afamin                     | 1835.77039 | 1283.4447  | 50 |
| 104776 | Aldh6a1  | aldehyde dehydrogenase     | 1550.71448 | 1381.08423 | 50 |
| 14261  | Fmo1     | flavin containing monoo    | 2004.70605 | 2326.35205 | 50 |
| 20776  | Tmie     | transmembrane inner ear    | 251.169861 | 356.298096 | 50 |
| 208677 | Creb3l3  | cAMP responsive elemen     | 6347.08008 | 5951.68652 | 50 |
| 69836  | Pla2g12b | phospholipase A2, group    | 6527.04834 | 8639.17188 | 50 |
| 74129  | Dmgdh    | dimethylglycine dehydro    | 1507.1427  | 1274.56738 | 50 |
| 74156  | Acot12   | acyl-CoA thioesterase 12   | 1641.77576 | 1361.0957  | 50 |
| 55938  | Apom     | apolipoprotein M           | 5580.1748  | 5855.98535 | 50 |

|                  |                 |                            |            |            |            |
|------------------|-----------------|----------------------------|------------|------------|------------|
| 15446            | Hpgd            | hydroxyprostaglandin de    | 5220.24512 | 3642.29004 | 50         |
| 12623            | Ces1g           | carboxylesterase 1G        | 2230.92163 | 2757.73486 | 50         |
| 209645           | Bend7           | BEN domain containing      | 312.123474 | 312.01178  | 50         |
| 60344            | Fign            | fidgetin                   | 507.420227 | 350.610901 | 50         |
| 14468            | Gbp1            | guanylate binding protein  | 174.455048 | 125.457169 | 50         |
| 76279            | Cyp2d26         | cytochrome P450, family    | 9755.9707  | 7059.45459 | 50         |
| 17195            | Mbl2            | mannose-binding lectin (   | 23271.8223 | 18034.9355 | 50         |
| 16621            | Klkb1           | kallikrein B, plasma 1     | 4683.28076 | 4065.24268 | 50         |
| 56720            | Tdo2            | tryptophan 2,3-dioxygen    | 9341.47754 | 8935.70117 | 50         |
| 18478            | Pah             | phenylalanine hydroxyla    | 1139.85742 | 1708.41748 | 50         |
| 667716           | Gm11789         | predicted gene 11789       | 411.791687 | 556.797546 | 50         |
| 235302           | D630033O11Rik   | RIKEN cDNA D630033         | 207.355682 | 155.658569 | 50         |
| 100504343        | Gm20185         | predicted gene, 20185      | 159.058228 | 120.948471 | 50         |
| 99650            | 4933434E20Rik   | RIKEN cDNA 4933434         | 143.895874 | 193.189621 | 50         |
| 214253           | Etnk2           | ethanolamine kinase 2      | 2582.37109 | 3134.62988 | 50         |
| 71891            | Cdadc1          | cytidine and dCMP deam     | 342.145599 | 440.530396 | 50         |
| 19893            | Rpgr            | retinitis pigmentosa GTP   | 115.866669 | 111.138809 | 50         |
| 30056            | Timm9           | translocase of inner mito  | 135.930527 | 149.331955 | 50         |
| 14728            | Lilrb4          | leukocyte immunoglobul     | 100.051613 | 121.312057 | 50         |
| 23965            | Odz3            | odd Oz/ten-m homolog 3     | 170.624481 | 150.86409  | 50         |
| 14263            | Fmo5            | flavin containing monoo    | 549.391968 | 686.851135 | 50         |
| 12398            | Cbfa2t3         | core-binding factor, runt  | 206.333878 | 257.41922  | 50         |
| 100038730        | Gm10387         | predicted gene 10387       | 120.489349 | 111.171356 | 50         |
| 242484           | D630039A03Rik   | RIKEN cDNA D630039         | 363.410278 | 270.400665 | 50         |
| 12398            | Cbfa2t3         | core-binding factor, runt  | 585.13147  | 474.84436  | 50         |
| 108030           | Lin7a           | lin-7 homolog A (C. eleg   | 233.087814 | 206.615295 | 50         |
| 130851233005     | Cyp2a12/Cyp2a22 | cytochrome P450, family    | 9494.03906 | 9671.84961 | 50         |
| 121021           | Cspg4           | chondroitin sulfate prote  | 208.805237 | 199.042297 | 50         |
| 11606            | Agt             | angiotensinogen (serpin    | 2685.74658 | 2086.20801 | 50         |
| 26557            | Homer2          | homer homolog 2 (Dros      | 140.583313 | 120.309021 | 50         |
| 54710            | Hs3st3b1        | heparan sulfate (glucosar  | 770.15155  | 936.097534 | 50         |
| 12491            | Cd36            | CD36 antigen               | 334.500244 | 232.781921 | 50         |
| 19013            | Ppara           | peroxisome proliferator a  | 427.223389 | 501.926331 | 50         |
| 320311           | Rnf152          | ring finger protein 152    | 427.731903 | 424.604919 | 50         |
| 18208            | Ntn1            | netrin 1                   | 115.383484 | 147.381058 | 50         |
| 11905            | Serpinc1        | serine (or cysteine) pepti | 28333.4062 | 29545.7344 | 50         |
| 229900           | Gbp7            | guanylate binding protein  | 216.849792 | 195.085342 | 50         |
| 18366            | Olfir64         | olfactory receptor 64      | 210.543091 | 249.307236 | 50         |
| 319430           | Gpr77           | G protein-coupled recept   | 271.233734 | 389.33316  | 50         |
| 67801            | Plip            | plasma membrane protec     | 668.347778 | 500.053223 | 50         |
| 128951100134861  | Cpt1b/BC090627  | camitine palmitoyltransf   | 256.245636 | 294.385803 | 50         |
| 17329            | Cxcl9           | chemokine (C-X-C moti      | 241.780304 | 248.53479  | 50         |
| 319772           | C130050O18Rik   | RIKEN cDNA C130050         | 153.016113 | 159.605637 | 50         |
| 12944            | Crp             | C-reactive protein, pentr  | 1784.03992 | 1996.44141 | 50         |
| 18606            | Enpp2           | ectonucleotide pyrophos    | 689.90564  | 919.873535 | 50         |
| 71891            | Cdadc1          | cytidine and dCMP deam     | 105.680267 | 123.262955 | 50         |
| 217214           | Nags            | N-acetylglutamate syntha   | 536.764343 | 683.192688 | 50         |
| 59083            | Fetub           | fetuin beta                | 824.769958 | 1088.8645  | 50         |
| 18606            | Enpp2           | ectonucleotide pyrophos    | 146.281677 | 109.584045 | 50         |
| 433281           | Gm5524          | predicted gene 5524        | 208.735535 | 147.997879 | 50         |
| 104307           | Rnu12           | RNA U12, small nuclear     | 130.33197  | 160.761459 | 50         |
| 320977           | A330023F24Rik   | RIKEN cDNA A330023         | 459.322388 | 617.872314 | 50         |
| 100038628        | Gm10768         | predicted gene 10768       | 551.613037 | 612.942017 | 50         |
| 128951100134861  | Cpt1b/BC090627  | camitine palmitoyltransf   | 108.026474 | 129.85553  | 50         |
| 100041449156388  | Cyp3a59/Cyp3a25 | cytochrome P450, subfar    | 4451.20508 | 3134.89868 | 50         |
| 1172211099591545 | Amy11Amy2a51An  | amylase 1, salivarylamyl   | 7774.81152 | 8860.40723 | 50         |
| 26365126367      | Ceacam1/Ceacam2 | carcinoembryonic antige    | 2157.89648 | 2672.18701 | 50         |
| 69627            | Fam89a          | family with sequence sin   | 577.60498  | 477.191406 | 50.7491302 |
| 338350           | Acad12          | acyl-Coenzyme A dehyd      | 130.506241 | 186.311249 | 50.9118118 |
| 26419            | Mapk8           | mitogen-activated protei   | 367.853973 | 453.559937 | 51.0744972 |
| 17329            | Cxcl9           | chemokine (C-X-C moti      | 204.675232 | 207.88147  | 51.3653564 |

|                  |               |                            |             |            |            |
|------------------|---------------|----------------------------|-------------|------------|------------|
| 66113            | Apoa5         | apolipoprotein A-V         | 2217.49707  | 2859.10791 | 52.0160904 |
| 12499            | Entpd5        | ectonucleoside triphosph   | 425.824524  | 512.676758 | 52.3710365 |
| 16169            | Il15ra        | interleukin 15 receptor, a | 601.592896  | 544.053772 | 52.4581299 |
| 50765            | Trfr2         | transferrin receptor 2     | 4438.58105  | 5244.70264 | 52.4581299 |
| 230661           | Testk2        | testis-specific kinase 2   | 132.130035  | 108.934685 | 52.5452232 |
| 70373            | 1700020O03Rik | RIKEN cDNA 1700020O03      | 211.609253  | 264.91156  | 52.609314  |
| 207781           | C2cd2         | C2 calcium-dependent do    | 1259.84302  | 1412.79517 | 52.6208115 |
| 68338            | Golt1a        | golgi transport 1 homolo   | 135.995483  | 162.67981  | 52.6849022 |
| 76088            | Dock8         | dedicator of cytokinesis 8 | 464.741943  | 457.714966 | 52.7719955 |
| 237387           | Lrrc3         | leucine rich repeat conta  | 399.907043  | 343.514709 | 52.8771667 |
| 15445            | Hpd           | 4-hydroxyphenylpyruvic     | 4777.01758  | 4620.89697 | 53.0628548 |
| 19212            | Pter          | phosphotriesterase relate  | 237.05307   | 292.84375  | 53.3011284 |
| 12606            | Cebpa         | CCAAT/enhancer bindin      | 2555.12451  | 2593.61768 | 53.3126297 |
| 11991            | Hnrnpd        | heterogeneous nuclear ri   | 231.319855  | 234.888428 | 53.7776794 |
| 22680            | Zfp207        | zinc finger protein 207    | 352.914978  | 345.663666 | 53.8532677 |
| 77219            | Ptgr2         | prostaglandin reductase 2  | 203.002319  | 210.51709  | 53.9288559 |
| 100041089        | Gm3134        | predicted gene 3134        | 323.266724  | 314.810059 | 53.9288559 |
| 229503           | Rrnad1        | ribosomal RNA adenine      | 147.317749  | 209.458862 | 54.2427216 |
| 26358            | Aldh1a7       | aldehyde dehydrogenase     | 6212.08301  | 7135.21582 | 54.6206741 |
| 72055            | Slc38a10      | solute carrier family 38,  | 189.329102  | 163.936096 | 54.6321793 |
| 20979            | Syt1          | synaptotagmin I            | 274.018738  | 336.56842  | 54.9345398 |
| 66948            | Acad8         | acyl-Coenzyme A dehyd      | 139.965485  | 141.086975 | 54.9345398 |
| 230866           | C230096C10Rik | RIKEN cDNA C230096C10      | 136.797089  | 168.94136  | 54.9986267 |
| 192119           | Dicer1        | Dicer1, Dcr-1 homolog      | 1289.599335 | 420.041016 | 55.0101318 |
| 105171           | Arrdc3        | arrestin domain containi   | 1386.67871  | 1674.05396 | 55.0857201 |
| 19193            | Pipox         | pipecolic acid oxidase     | 2207.53735  | 1740.20898 | 55.1613083 |
| 246103           | Atxn7         | ataxin 7                   | 257.03772   | 363.351868 | 55.1728134 |
| 75475            | Oplah         | 5-oxoprolinase (ATP-hyd    | 1054.95874  | 1085.93176 | 55.3239937 |
| 111975           | Igf2as        | insulin-like growth facto  | 196.372437  | 238.702499 | 55.550766  |
| 54354            | Rassf5        | Ras association (RalGDS    | 136.100037  | 187.369476 | 56.0914001 |
| 106861           | Abhd3         | abhydrolase domain cont    | 785.871582  | 702.387573 | 56.3296738 |
| 70750            | Kdsr          | 3-ketodihydrosphingosin    | 164.164124  | 171.10022  | 56.7832184 |
| 58911            | Sumf1         | sulfatase modifying facto  | 167.620819  | 179.741302 | 57.097084  |
| 26378            | Decr2         | 2-4-dienoyl-Coenzyme A     | 584.394836  | 697.056885 | 57.3468628 |
| 93760            | Arid1a        | AT rich interactive doma   | 164.442932  | 127.638672 | 57.7248154 |
| 30935            | Tor3a         | torsin family 3, member    | 222.573502  | 179.819122 | 57.7889023 |
| 72472            | Slc16a10      | solute carrier family 16   | 799.88855   | 979.659546 | 57.7889023 |
| 268936           | Brpf3         | bromodomain and PHD        | 154.500504  | 219.40152  | 58.1783562 |
| 22282            | Usf2          | upstream transcription fa  | 401.008057  | 375.222778 | 58.1783562 |
| 112419           | 2010002M12Rik | RIKEN cDNA 2010002M12      | 146.590607  | 207.949371 | 58.4166298 |
| 75863            | Clec4g        | C-type lectin domain fan   | 4466.35986  | 4582.0166  | 58.4807167 |
| 13690            | Eif4g2        | eukaryotic translation ini | 193.547821  | 190.378571 | 59.3467216 |
| 227696           | Phyhd1        | phytanoyl-CoA dioxyger     | 3068.70117  | 3483.18091 | 59.573494  |
| 1172711173012190 | AnglAng3lAng4 | angiogenin, ribonuclease   | 7034.62402  | 6764.40234 | 60.1256332 |
| 234797           | 6430548M08Rik | RIKEN cDNA 6430548M08      | 352.750244  | 471.251007 | 60.3524017 |
| 72780            | Rspo3         | R-spondin 3 homolog (X)    | 151.910339  | 179.731415 | 60.4279938 |
| 240025           | Dact2         | dapper homolog 2, antag    | 137.066406  | 195.867676 | 60.5035858 |
| 240613           | 9930021J03Rik | RIKEN cDNA 9930021J03      | 233.666046  | 213.711517 | 60.7303543 |
| 237542           | Osbp18        | oxysterol binding protein  | 159.676086  | 176.115387 | 61.1954002 |
| 71750            | R3hdm2        | R3H domain containing      | 243.965576  | 200.850311 | 61.1954002 |
| 414085           | 9330151L19Rik | RIKEN cDNA 9330151L19      | 232.699692  | 192.826035 | 61.4336739 |
| 414872           | Zyg11b        | zyg-11 homolog B (C. ele   | 171.346863  | 159.0737   | 61.6719513 |
| 231999           | Plekha8       | pleckstrin homology don    | 311.530975  | 213.282852 | 61.8116226 |
| 66391            | 2310061J03Rik | RIKEN cDNA 2310061J03      | 445.848816  | 514.017944 | 62.514946  |
| 382051           | Pdp2          | pyruvate dehydrogenase p   | 728.190918  | 989.170654 | 62.590538  |
| 68021            | Bphl          | biphenyl hydrolase-like    | 486.56427   | 348.231384 | 62.8813934 |
| 69536            | Hemk1         | HemK methyltransferase     | 155.53183   | 223.017517 | 63.1426773 |
| 68943            | Pink1         | PTEN induced putative k    | 549.08783   | 708.265747 | 63.5091248 |
| 171207           | Arhgap4       | Rho GTPase activating p    | 227.932831  | 322.756531 | 63.5962181 |
| 234135           | Whsc111       | Wolf-Hirschhorn syndro     | 234.611816  | 311.317139 | 63.7358971 |
| 14852            | Gspt1         | G1 to S phase transition   | 142.037613  | 138.253296 | 64.1483612 |

|              |               |                            |            |            |            |
|--------------|---------------|----------------------------|------------|------------|------------|
| 104175       | Sbk1          | SH3-binding kinase 1       | 177.77713  | 209.205627 | 64.9157639 |
| 23806        | Arih1         | ariadne ubiquitin-conjug   | 322.943542 | 357.080444 | 65.2181244 |
| 246738       | Dnajc28       | DnaJ (Hsp40) homolog,      | 334.579468 | 388.229675 | 65.5319901 |
| 239796       | 1600021P15Rik | RIKEN cDNA 1600021P        | 369.796204 | 497.11908  | 65.5319901 |
| 66333        | Aqp11         | aquaporin 11               | 511.524902 | 533.35144  | 65.6190796 |
| 103677       | Smg6          | Smg-6 homolog, nonsens     | 143.487152 | 203.716522 | 66.2123108 |
| 66412        | Arrdc4        | arrestin domain containi   | 156.67244  | 223.566437 | 66.2238083 |
| 241274       | Pnpla7        | patatin-like phospholipas  | 1833.63013 | 1485.41968 | 66.473587  |
| 232371       | C1rl          | complement component       | 448.787476 | 417.515747 | 66.537674  |
| 329828       | AI464131      | expressed sequence AI46    | 211.5047   | 166.526428 | 66.6773529 |
| 211446       | Exoc3         | exocyst complex compo      | 138.65535  | 204.531403 | 66.688858  |
| 16880        | Lifr          | leukemia inhibitory facto  | 841.52124  | 761.153564 | 66.7003555 |
| 232146       | Fam176a       | family with sequence sim   | 3663.55322 | 3271.76709 | 66.8515396 |
| 104776       | Aldh6a1       | aldehyde dehydrogenase     | 1369.65967 | 979.436035 | 66.8630371 |
| 235582       | Glyctk        | glycerate kinase           | 4945.15674 | 4851.21729 | 67.0783081 |
| 104910       | Slc25a47      | solute carrier family 25,  | 24977.1738 | 27574.4922 | 67.2409897 |
| 56441        | Nat6          | N-acetyltransferase 6      | 153.155518 | 203.891953 | 67.3050842 |
| 319565       | Syne2         | synaptic nuclear envelop   | 174.041595 | 159.891418 | 67.5433578 |
| 319278       | A230050P20Rik | RIKEN cDNA A230050         | 1670.35156 | 2232.11914 | 68.1595764 |
| 16971        | Lrp1          | low density lipoprotein r  | 4544.71436 | 4081.36475 | 68.8398972 |
| 54598        | Calcr1        | calcitonin receptor-like   | 1066.71826 | 1302.18823 | 68.9269867 |
| 17777        | Mttp          | microsomal triglyceride t  | 1402.6886  | 1357.43018 | 69.0781708 |
| 217869       | Eif5          | eukaryotic translation ini | 142.416229 | 178.25444  | 69.7814941 |
| 11807        | Apoa2         | apolipoprotein A-II        | 58553.8516 | 65665.2109 | 69.7929916 |
| 102442       | Dennd4a       | DENN/MADD domain c         | 370.223938 | 449.768494 | 70.083847  |
| 243085       | Ugt2b35       | UDP glucuronosyltransfe    | 2367.5127  | 2267.5437  | 70.0953522 |
| 17920        | Myo6          | myosin VI                  | 171.625687 | 159.349579 | 70.2465363 |
| 217351       | Tnrc6c        | trinucleotide repeat conta | 154.639908 | 226.620819 | 70.2580414 |
| 216874       | Camta2        | calmodulin binding trans   | 202.523895 | 268.803467 | 70.8512573 |
| 21386        | Tbx3          | T-box 3                    | 3129.11914 | 2609.94775 | 70.8627625 |
| 11990        | Atrn          | attractin                  | 287.352936 | 195.338562 | 71.4904938 |
| 544963       | Iqgap2        | IQ motif containing GTP    | 3677.77148 | 3511.23047 | 72.0311279 |
| 72180        | Zfp661        | zinc finger protein 661    | 146.630203 | 158.479523 | 72.3334961 |
| 57344        | As3mt         | arsenic (+3 oxidation sta  | 2458.13208 | 2685.64355 | 72.420578  |
| 13423        | Dnase2a       | deoxyribonuclease II alp   | 152.532928 | 223.235397 | 73.1879883 |
| 74616        | Scrn3         | secernin 3                 | 490.355286 | 549.214661 | 73.8798065 |
| 219189       | 1300010F03Rik | RIKEN cDNA 1300010F        | 2072.67456 | 1383.56152 | 74.5075378 |
| 234733       | Ddx19b        | DEAD (Asp-Glu-Ala-As       | 241.252777 | 282.930817 | 74.97258   |
| 230103       | Npr2          | natriuretic peptide recept | 258.327271 | 294.684296 | 76.2806244 |
| 240753       | Plekha6       | pleckstrin homology dom    | 287.039276 | 314.634644 | 76.2806244 |
| 67432        | Hogal         | 4-hydroxy-2-oxoglutarate   | 1297.45667 | 1362.01392 | 76.4433136 |
| 213742       | Xist          | inactive X specific transc | 464.363312 | 499.686829 | 76.6815872 |
| 226418       | Yod1          | YOD1 OTU deubiquitin       | 384.296356 | 429.045715 | 77.3733978 |
| 223672171898 | Apol9a1Apol9b | apolipoprotein L 9a/apol   | 1441.4729  | 1618.59705 | 77.6642609 |
| 319530       | Zfp750        | zinc finger protein 750    | 411.443176 | 611.779175 | 78.1408081 |
| 16008        | Igfbp2        | insulin-like growth facto  | 2310.44043 | 3262.70996 | 78.2164001 |
| 27362        | Dnajb9        | DnaJ (Hsp40) homolog,      | 616.717224 | 745.716187 | 79.146492  |
| 11606        | Agt           | angiotensinogen (serpin    | 4973.33789 | 6940.79199 | 79.2220764 |
| 60440        | Iigp1         | interferon inducible GTP   | 7088.36279 | 8578.43945 | 79.3847656 |
| 76261        | 0610040J01Rik | RIKEN cDNA 0610040J        | 4032.65869 | 4502.2627  | 79.5244446 |
| 17388        | Mmp15         | matrix metalloproteinase   | 530.462402 | 762.646057 | 79.600029  |
| 12684        | Cideb         | cell death-inducing DNA    | 5237.43652 | 4733.16504 | 79.6871262 |
| 100503386    | Gm4980        | predicted gene 4980        | 897.414917 | 780.506897 | 79.8498077 |
| 20869        | Stk11         | serine/threonine kinase 1  | 166.176056 | 177.647522 | 80.1406708 |
| 69179        | Tmem110       | transmembrane protein 1    | 216.401459 | 298.794067 | 81.4602127 |
| 227377       | Farp2         | FERM, RhoGEF and ple       | 641.338867 | 727.664307 | 81.9252625 |
| 320940       | Atp11c        | ATPase, class VI, type 1   | 504.795197 | 401.259216 | 82.7797623 |
| 100861531    | Rn45s         | 45S pre-ribosomal RNA      | 1070.57568 | 886.289551 | 83.483078  |
| 11761        | Aox1          | aldehyde oxidase 1         | 2267.14893 | 2057.27686 | 83.622757  |
| 71768        | Vwce          | von Willebrand factor C    | 284.319214 | 311.404846 | 83.6868439 |
| 320302       | Glt28d2       | glycosyltransferase 28 dc  | 377.392426 | 518.614319 | 83.7969513 |



|        |               |                                 |            |            |            |
|--------|---------------|---------------------------------|------------|------------|------------|
| 19263  | Ptprb         | protein tyrosine phosphatase    | 1132.73975 | 1285.62207 | 84.0993042 |
| 330790 | Hapln4        | hyaluronan and proteoglycan     | 204.839981 | 301.364594 | 84.5643539 |
| 15451  | Hpn           | hepsin                          | 21182.2109 | 29081.9727 | 84.6514435 |
| 14528  | Gch1          | GTP cyclohydrolase 1            | 1561.85144 | 1975.02673 | 84.9538116 |
| 14871  | Gstt1         | glutathione S-transferase theta | 4609.16553 | 6476.35156 | 85.2676697 |
| 14635  | Galk1         | galactokinase 1                 | 402.42749  | 290.152954 | 85.3317642 |
| 110265 | MsrA          | methionine sulfoxide reductase  | 2166.97852 | 1861.43042 | 86.110672  |
| 67630  | Samd8         | sterile alpha motif domain      | 200.805023 | 285.855042 | 86.8024902 |
| 17979  | Ncoa3         | nuclear receptor coactivator    | 230.318634 | 315.293884 | 87.581398  |
| 67484  | Eepd1         | endonuclease/exonuclease        | 224.1371   | 335.730927 | 88.2617188 |
| 11529  | Adh7          | alcohol dehydrogenase 7         | 289.952606 | 220.271561 | 88.8779373 |
| 269823 | Pon3          | paraoxonase 3                   | 465.413635 | 696.261841 | 89.3429871 |
| 22259  | Nr1h3         | nuclear receptor subfamily      | 2425.61011 | 1961.79346 | 90.1333923 |
| 280408 | Rilp          | Rab interacting lysosomal       | 254.317657 | 325.690674 | 90.1333923 |
| 245860 | Atg9a         | autophagy-related 9A (yeast)    | 225.656342 | 325.479858 | 90.2089844 |
| 320817 | Atad2b        | ATPase family, AAA domain       | 334.579468 | 412.513306 | 90.4472656 |
| 21429  | Ubtf          | upstream binding transcription  | 331.08313  | 419.511902 | 91.7668076 |
| 16005  | Igfals        | insulin-like growth factor      | 13145.373  | 12810.2314 | 91.8308945 |
| 71893  | NoxO1         | NADPH oxidase organizer         | 397.765198 | 426.137054 | 92.057663  |
| 103142 | Rdh9          | retinol dehydrogenase 9         | 1945.11646 | 2131.69385 | 92.2203522 |
| 218989 | 6720456H20Rik | RIKEN cDNA 6720456H20           | 243.125305 | 271.468781 | 92.6623917 |
| 239570 | Ttc38         | tetratricopeptide repeat d      | 939.077759 | 1340.97852 | 93.4643097 |
| 102093 | Phkb          | phosphorylase kinase beta       | 195.211227 | 234.963409 | 93.5399017 |
| 214137 | Arhgap29      | Rho GTPase activating protein   | 1222.47498 | 1628.17468 | 94.307312  |
| 69134  | Fam25c        | family with sequence similarity | 3320.19092 | 4789.40674 | 94.3828964 |
| 12361  | Cask          | calcium/calmodulin-dependent    | 208.56601  | 255.157089 | 94.3828964 |
| 207798 | Gramd1c       | GRAM domain containing          | 663.595215 | 977.82605  | 94.7723541 |
| 72129  | Pex13         | peroxisomal biogenesis factor   | 311.268005 | 345.641022 | 95.4756699 |
| 66468  | Skal          | spindle and kinetochore         | 323.84494  | 404.897888 | 95.7665253 |
| 171210 | Acot2         | acyl-CoA thioesterase 2         | 936.257935 | 895.657837 | 97.09758   |
| 68177  | Ebpl          | emopamil binding protein        | 916.198792 | 799.564575 | 97.3243484 |
| 21355  | Tap2          | transporter 2, ATP-binding      | 979.853455 | 1199.27893 | 99.0974426 |
| 213989 | Tmem82        | transmembrane protein 82        | 536.320801 | 627.581543 | 99.4228058 |
| 21375  | Tbr1          | T-box brain gene 1              | 459.591736 | 449.447357 | 99.6380768 |
| 78329  | 2310010J17Rik | RIKEN cDNA 2310010J17           | 272.295135 | 381.474426 | 99.6495819 |
| 353170 | Txlng         | taxilin gamma                   | 370.732452 | 331.894226 | 99.9634399 |
| 67155  | Smarca2       | SWI/SNF related, matrix         | 264.524658 | 293.074341 | 100.341393 |
| 93765  | Ube2n         | ubiquitin-conjugating enzyme    | 227.658768 | 216.204254 | 100.579666 |
| 252966 | Cables2       | CDK5 and Abl enzyme sub         | 416.17041  | 530.621033 | 100.591171 |
| 624219 | Gm6484        | predicted gene 6484             | 392.524689 | 398.668884 | 100.655258 |
| 67727  | Stx17         | syntaxin 17                     | 305.688446 | 321.986938 | 101.422668 |
| 12724  | Clcn2         | chloride channel 2              | 459.770721 | 467.933472 | 101.974808 |
| 244416 | Ppp1r3b       | protein phosphatase 1, reg      | 457.74295  | 444.246826 | 102.0504   |
| 71918  | Zcchc24       | zinc finger, CCHC domain        | 5063.03516 | 4881.26562 | 102.201576 |
| 20623  | Snrk          | SNF related kinase              | 610.570557 | 721.051941 | 102.300171 |
| 15220  | Foxq1         | forkhead box Q1                 | 559.5578   | 739.736145 | 102.526947 |
| 12176  | Bnip3         | BCL2/adenovirus E1B inter       | 335.6203   | 406.482361 | 102.893394 |
| 11425  | Apoc4         | apolipoprotein C-IV             | 21871.75   | 17659.4805 | 103.20726  |
| 70503  | Ddo           | D-aspartate oxidase             | 294.291748 | 315.793304 | 103.20726  |
| 15377  | Foxa3         | forkhead box A3                 | 6983.89453 | 9637.91992 | 103.358444 |
| 68440  | Dusp23        | dual specificity phosphatase    | 228.246506 | 300.524231 | 103.509621 |
| 12572  | Cdk7          | cyclin-dependent kinase         | 322.081726 | 295.463806 | 104.212944 |
| 110616 | Atxn3         | ataxin 3                        | 218.543304 | 273.046204 | 105.207123 |
| 74008  | Arsg          | arylsulfatase G                 | 595.796265 | 812.471008 | 105.986031 |
| 213988 | Tnrc6b        | trinucleotide repeat cont       | 560.305542 | 803.38855  | 106.386986 |
| 78914  | Nadsyn1       | NAD synthetase 1                | 243.773224 | 364.036621 | 106.84053  |
| 227541 | Camk1d        | calcium/calmodulin-depen        | 545.900391 | 444.334564 | 107.456757 |
| 54338  | Slc23a2       | solute carrier family 23 (org   | 265.734985 | 276.110474 | 107.706535 |
| 14555  | Gpd1          | glycerol-3-phosphate dehyd      | 17519.7812 | 17194.6562 | 109.479622 |
| 66836  | Tmem223       | transmembrane protein 223       | 1152.34412 | 1392.55762 | 109.566711 |
| 231207 | Cpeb2         | cytoplasmic polyadenylation     | 637.229431 | 871.331787 | 110.031761 |

|           |               |                                   |            |            |            |
|-----------|---------------|-----------------------------------|------------|------------|------------|
| 232906    | Grfl1         | glucocorticoid receptor I         | 281.893799 | 384.701355 | 110.473801 |
| 219189    | 1300010F03Rik | RIKEN cDNA 1300010F03             | 2544.32812 | 1790.42725 | 110.560898 |
| 75869     | Arl5b         | ADP-ribosylation factor-5         | 283.417786 | 360.320129 | 111.037445 |
| 19885     | Rorc          | RAR-related orphan receptor       | 423.009399 | 567.830933 | 111.241211 |
| 67769     | Gpatch2       | G patch domain containing         | 298.261719 | 407.365173 | 111.717758 |
| 545622    | Ptpn3         | protein tyrosine phosphatase      | 382.577515 | 362.459167 | 112.333984 |
| 11432     | Acp2          | acid phosphatase 2, lysosomal     | 343.48584  | 403.395447 | 113.1129   |
| 68750     | Rreb1         | ras responsive element binding    | 702.473022 | 523.077759 | 113.264076 |
| 13107     | Cyp2f2        | cytochrome P450, family 2         | 10398.1484 | 7865.29346 | 113.688034 |
| 15357     | Hmgcr         | 3-hydroxy-3-methylglutaryl        | 322.012024 | 334.848145 | 114.258255 |
| 170716    | Cyp4f13       | cytochrome P450, family 4         | 1124.54614 | 994.416504 | 114.420944 |
| 16439     | Itrp2         | inositol 1,4,5-triphosphate       | 894.55072  | 1032.46948 | 115.176842 |
| 68777     | Tmem53        | transmembrane protein 53          | 1130.49329 | 823.075745 | 116.269615 |
| 320808    | Dcaf5         | DDB1 and CUL4 associated          | 316.831696 | 353.885986 | 116.420799 |
| 12013     | Bach1         | BTB and CNC homology 1            | 267.837189 | 375.71936  | 116.594986 |
| 382117    | D9Erd402e     | DNA segment, Chr 9, Eukary        | 392.320312 | 578.831787 | 117.060028 |
| 68646     | 1110020G09Rik | RIKEN cDNA 1110020G09             | 391.757935 | 351.847382 | 118.594849 |
| 67958     | 2610101N10Rik | RIKEN cDNA 2610101N10             | 270.367157 | 375.33313  | 119.332672 |
| 21843     | Tial1         | Tial cytotoxic granule-associated | 668.476196 | 777.329468 | 119.751709 |
| 232078    | Thns12        | threonine synthase-like 2         | 1470.79321 | 1199.65796 | 120.984161 |
| 269630    | 5031425E22Rik | RIKEN cDNA 5031425E22             | 304.17395  | 372.249023 | 121.158348 |
| 77031     | Slc9a8        | solute carrier family 9 (sodium   | 583.756348 | 825.091675 | 122.489403 |
| 68671     | Pcvt2         | phosphate cytidylyltransferase    | 593.534058 | 492.906067 | 122.617569 |
| 219181    | Akap11        | A kinase (PRKA) anchor protein    | 410.248688 | 462.905579 | 123.181213 |
| 218850    | D14Abble      | DNA segment, Chr 14, Eukary       | 254.975098 | 381.130615 | 124.186897 |
| 67867     | Lrrc28        | leucine rich repeat containing    | 256.903076 | 364.74115  | 124.250984 |
| 20338     | Sel1l         | sel-1 suppressor of lin-12        | 511.355408 | 617.839844 | 124.791626 |
| 22318     | Vamp2         | vesicle-associated membrane       | 423.09021  | 613.019897 | 125.33226  |
| 102448    | Xylb          | xylulokinase homolog (Fungi)      | 1439.74927 | 1426.63391 | 126.122665 |
| 23802     | Amfr          | autocrine motility factor         | 1126.18579 | 1064.18469 | 126.239342 |
| 192166    | Sardh         | sarcosine dehydrogenase           | 3610.86426 | 4921.53125 | 126.285355 |
| 18706     | Pik3ca        | phosphatidylinositol 3-kinase     | 255.802063 | 286.549683 | 126.779976 |
| 69215     | Sat2          | spermidine/spermine N1-acetyl     | 409.117554 | 420.316895 | 126.890076 |
| 73137     | Prrc1         | proline-rich coiled-coil 1        | 425.046692 | 460.192139 | 127.872749 |
| 100503842 | 2410022M11Rik | RIKEN cDNA 2410022M11             | 484.492126 | 434.577271 | 129.506165 |
| 13688     | Eif4ebp2      | eukaryotic translation initiation | 452.035095 | 570.496277 | 131.529022 |
| 72194     | Fbx120        | F-box and leucine-rich repeat     | 297.195557 | 360.62854  | 132.122253 |
| 22770     | Zhx1          | zinc fingers and homeobox         | 333.687561 | 489.516418 | 132.610291 |
| 234854    | Cdk10         | cyclin-dependent kinase 10        | 340.377625 | 347.105286 | 132.610291 |
| 240753    | Plekha6       | pleckstrin homology domain        | 691.190369 | 559.31012  | 132.848572 |
| 66205     | Cd302         | CD302 antigen                     | 2420.09082 | 3513.61279 | 132.999756 |
| 212862    | Chpt1         | choline phosphotransferase        | 366.274536 | 303.964844 | 133.354706 |
| 68204     | 2900060B14Rik | RIKEN cDNA 2900060B14             | 928.30835  | 1390.87134 | 135.453156 |
| 77733     | Rnf170        | ring finger protein 170           | 282.720734 | 382.454803 | 135.476166 |
| 29809     | Rabgap11      | RAB GTPase activating protein     | 647.759644 | 822.86499  | 136.458832 |
| 12751     | Tpp1          | tripeptidyl peptidase I           | 504.202728 | 563.96167  | 137.17366  |
| 52633     | Nit2          | nitrilase family, member 2        | 580.847778 | 544.572998 | 137.313339 |
| 320808    | Dcaf5         | DDB1 and CUL4 associated          | 294.196686 | 418.057587 | 137.400436 |
| 19934     | Rpl22         | ribosomal protein L22             | 468.965393 | 388.959686 | 137.615707 |
| 278279    | Tmtc2         | transmembrane and tetra-spanning  | 709.028442 | 624.03064  | 139.952438 |
| 14874     | Gstz1         | glutathione transferase zeta      | 4110.88281 | 4512.09521 | 141.196381 |
| 213649    | Arhgef19      | Rho guanine nucleotide exchange   | 1123.7002  | 1405.42737 | 143.207764 |
| 229487    | Pet112l       | PET112-like (yeast)               | 307.611664 | 332.501129 | 143.335922 |
| 53972     | Ngef          | neuronal guanine nucleotide       | 863.429138 | 1082.71887 | 143.975159 |
| 68526     | Gpr155        | G protein-coupled receptor        | 338.414795 | 331.91684  | 144.463211 |
| 71336     | Rbks          | ribokinase                        | 390.213318 | 391.936249 | 145.132019 |
| 380629    | Heca          | headcase homolog (Drosophila)     | 543.419556 | 583.834229 | 147.218979 |
| 70012     | Ccdc21        | coiled-coil domain containing     | 497.94043  | 658.578003 | 147.608429 |
| 27364     | Srr           | serine racemase                   | 2349.37207 | 1745.62451 | 147.910797 |
| 56358     | Copz2         | coatamer protein complex          | 588.089172 | 728.391479 | 151.07901  |
| 67201     | Glod4         | glyoxalase domain containing      | 347.565125 | 318.932556 | 151.793854 |

|           |               |                             |            |            |            |
|-----------|---------------|-----------------------------|------------|------------|------------|
| 50776     | Polg2         | polymerase (DNA direct      | 345.836792 | 328.674316 | 154.043488 |
| 70209     | Tmem143       | transmembrane protein 1     | 370.862366 | 310.599854 | 154.822388 |
| 18128     | Notch1        | Notch gene homolog 1 (      | 607.357788 | 887.770813 | 155.037659 |
| 240186    | Zfp438        | zinc finger protein 438     | 773.465698 | 1118.89746 | 156.368713 |
| 20318     | Sdf4          | stromal cell derived facto  | 423.582886 | 413.769592 | 157.060516 |
| 64008     | Aqp9          | aquaporin 9                 | 3944.47119 | 4431.43799 | 157.502563 |
| 11819     | Nr2f2         | nuclear receptor subfami    | 464.741943 | 641.094971 | 159.775208 |
| 94217     | Lrp1b         | low density lipoprotein-r   | 406.292969 | 413.912476 | 159.914886 |
| 231326    | Aasdh         | aminoadipate-semialdeh      | 363.858643 | 529.855652 | 160.077576 |
| 67207     | Lsm1          | LSM1 homolog, U6 sma        | 588.722839 | 521.59375  | 160.315842 |
| 78255     | Ralgps2       | Ral GEF with PH domai       | 691.100098 | 825.854248 | 162.304199 |
| 21685     | Tef           | thyrotroph embryonic fac    | 606.326477 | 556.080322 | 163.646759 |
| 223646    | Naprt1        | nicotinate phosphoribosy    | 4590.65137 | 5662.1377  | 164.867706 |
| 67422     | Dhdds         | dehydrodolicetyl diphosp    | 371.350281 | 398.393005 | 165.58252  |
| 225913    | Dak           | dihydroxyacetone kinase     | 1813.73254 | 1800.15479 | 165.733704 |
| 74764     | Klc4          | kinesin light chain 4       | 1281.56714 | 1189.43384 | 167.041748 |
| 224656    | Zfp523        | zinc finger protein 523     | 339.246521 | 456.130493 | 167.367126 |
| 12339     | Capn7         | calpain 7                   | 428.793304 | 531.442993 | 167.733582 |
| 16988     | Lst1          | leukocyte specific trans    | 544.86438  | 704.997681 | 168.837845 |
| 71670     | Acy3          | aspartoacylase (aminoacy    | 751.038208 | 673.438232 | 169.117203 |
| 53621     | Cnot4         | CCR4-NOT transcription      | 562.856079 | 632.872559 | 169.669342 |
| 100504663 | Atg14         | VATG14 autophagy rela       | 797.841797 | 1013.94519 | 169.832031 |
| 110095    | Pygl          | liver glycogen phosphor     | 4649.18896 | 5198.5376  | 169.832031 |
| 17117     | Amacr         | alpha-methylacyl-CoA r      | 646.713989 | 514.153687 | 171.854889 |
| 212483    | Fam193b       | family with sequence sim    | 602.918823 | 771.048096 | 174.081512 |
| 329650    | Med12l        | mediator of RNA polym       | 487.779358 | 476.840515 | 174.319794 |
| 14913     | Guc1a         | guanylate cyclase activat   | 897.579712 | 966.990723 | 176.08139  |
| 69870     | Polr3gl       | polymerase (RNA) III (D     | 431.253571 | 483.131775 | 176.319672 |
| 243382    | Ppm1k         | protein phosphatase 1K (    | 1748.76294 | 1982.41162 | 177.249756 |
| 107766    | Hao           | 3-hydroxyanthranilate 3,    | 5613.83887 | 6424.4248  | 179.941422 |
| 213819    | Casd1         | CAS1 domain containing      | 381.611145 | 412.282715 | 180.202698 |
| 21416     | Tcf7l2        | transcription factor 7 like | 496.750641 | 424.37146  | 180.330872 |
| 71361     | Aifm2         | apoptosis-inducing facto    | 412.753296 | 605.030945 | 181.03421  |
| 320560    | Dennd5b       | DENN/MADD domain c          | 658.454529 | 871.695312 | 182.039886 |
| 98432     | Phlpp1        | PH domain and leucine r     | 462.872559 | 619.183777 | 183.272339 |
| 223631    | BC025446      | cDNA sequence BC0254        | 2658.0957  | 2005.75732 | 184.591888 |
| 71755     | Dhdh          | dihydrodiol dehydrogena     | 1675.30371 | 2076.39258 | 185.23111  |
| 68636     | Fahd1         | fumarylacetoacetate hyd     | 608.926147 | 538.476929 | 186.213791 |
| 170460    | Stard5        | STAR-related lipid transf   | 1624.93262 | 2294.77539 | 186.678833 |
| 14544     | Gda           | guanine deaminase           | 1031.11023 | 1000.43182 | 187.132385 |
| 15586     | Hyal1         | hyaluronoglucosaminida      | 1016.0318  | 1460.69751 | 188.08548  |
| 15458     | Hpx           | hemopexin                   | 22475.9238 | 31850.582  | 188.550522 |
| 209558    | Enpp3         | ectonucleotide pyrophos     | 476.373108 | 568.041748 | 189.968658 |
| 382793    | Mtx3          | metaxin 3                   | 855.275269 | 710.609924 | 190.5849   |
| 67800     | Dgat2         | diacylglycerol O-acyltran   | 3303.48071 | 2936.69092 | 193.125397 |
| 224585    | Zfp160        | zinc finger protein 160     | 598.525879 | 617.505981 | 194.834381 |
| 52637     | Cisd1         | CDGSH iron sulfur dom       | 989.965393 | 1178.85181 | 194.886963 |
| 66443     | Tnfaip8l1     | tumor necrosis factor, al   | 438.371399 | 464.067017 | 195.90416  |
| 100504527 | Gm10374       | predicted gene 10374        | 882.970215 | 706.249756 | 198.694427 |
| 270076    | Gcdh          | glutaryl-Coenzyme A de      | 2607.94971 | 2514.76978 | 201.08374  |
| 76974     | 1190003J15Rik | RIKEN cDNA 1190003J         | 12460.1016 | 13359.2852 | 202.089432 |
| 67017     | 2010011I20Rik | RIKEN cDNA 2010011I         | 947.05896  | 863.249512 | 203.56015  |
| 71782     | Ankle2        | ankyrin repeat and LEM      | 560.135986 | 839.19928  | 205.873886 |
| 54403     | Slc4a4        | solute carrier family 4 (a  | 1120.90405 | 1254.11768 | 207.862244 |
| 107351    | Kank1         | KN motif and ankyrin re     | 901.150513 | 1029.69812 | 208.274704 |
| 227334    | Usp40         | ubiquitin specific peptid   | 555.194885 | 751.36084  | 209.053604 |
| 72108     | Dhdh2         | DDHD domain containin       | 558.865479 | 479.278076 | 210.02478  |
| 29869     | Ulk2          | Unc-51 like kinase 2 (C.    | 569.943787 | 689.990417 | 214.1987   |
| 16438     | Itpr1         | inositol 1,4,5-trisphospha  | 667.818726 | 954.65863  | 214.547058 |
| 71664     | Mettl7b       | methyltransferase like 7b   | 26093.7383 | 23428.1055 | 215.55275  |
| 19883     | Rora          | RAR-related orphan rece     | 1315.24084 | 1295.94385 | 216.070374 |

|        |               |                            |            |            |            |
|--------|---------------|----------------------------|------------|------------|------------|
| 21848  | Trim24        | tripartite motif-containin | 726.720825 | 683.851929 | 216.785202 |
| 11639  | Ak4           | adenylate kinase 4         | 907.073792 | 612.139893 | 216.872284 |
| 246103 | Atxn7         | ataxin 7                   | 573.335571 | 838.387207 | 217.034973 |
| 232232 | Hdac11        | histone deacetylase 11     | 953.015564 | 1022.79712 | 217.151642 |
| 52466  | Slc46a1       | solute carrier family 46,  | 587.477661 | 476.32135  | 218.25592  |
| 381110 | Fam82a1       | family with sequence sin   | 745.23053  | 628.895874 | 218.668396 |
| 15511  | Hspa1b        | heat shock protein 1B      | 515.718262 | 645.882324 | 219.238602 |
| 67393  | Cxxc5         | CXXC finger 5              | 591.726501 | 752.359619 | 219.889343 |
| 208922 | Cpeb3         | cytoplasmic polyadenyla    | 488.267273 | 645.51593  | 220.535141 |
| 71330  | Rcbtb1        | regulator of chromosome    | 863.125    | 907.483459 | 221.499756 |
| 76784  | Mtif2         | mitochondrial translation  | 663.983398 | 677.801208 | 221.889191 |
| 235493 | BC031353      | cDNA sequence BC0313       | 1153.12817 | 1258.21179 | 223.284332 |
| 67815  | Sec14l2       | SEC14-like 2 (S. cerevis   | 5835.41309 | 6561.57422 | 223.749374 |
| 53323  | Ube2k         | ubiquitin-conjugating en   | 473.84314  | 565.899841 | 224.237427 |
| 56738  | Mocs1         | molybdenum cofactor sy     | 2100.63403 | 1923.29895 | 225.208603 |
| 68267  | Slc25a22      | solute carrier family 25 ( | 3702.21069 | 5220.81641 | 225.371277 |
| 56632  | Sphk2         | sphingosine kinase 2       | 1325.39722 | 1960.06604 | 225.481384 |
| 212503 | Paox          | polyamine oxidase (exo-    | 662.831665 | 878.485962 | 226.010529 |
| 13688  | Eif4ebp2      | eukaryotic translation ini | 827.265076 | 889.491089 | 226.970184 |
| 224826 | Ubr2          | ubiquitin protein ligase E | 673.068726 | 682.349487 | 230.26001  |
| 77411  | Esrp2         | epithelial splicing regula | 511.16687  | 658.221497 | 230.63797  |
| 14132  | Fcgrt         | Fc receptor, IgG, alpha c  | 7221.70312 | 6797.57617 | 231.696228 |
| 103140 | Gstt3         | glutathione S-transferase  | 9524.61133 | 10885.4541 | 233.655014 |
| 69993  | Chn2          | chimerin (chimaerin) 2     | 522.707764 | 582.918945 | 237.16011  |
| 54636  | Wdr45         | WD repeat domain 45        | 735.861572 | 871.062988 | 237.67775  |
| 67118  | Bfar          | bifunctional apoptosis re  | 789.667358 | 938.869019 | 238.660431 |
| 232947 | Ppp1r37       | protein phosphatase 1, re  | 588.225464 | 802.651489 | 239.084381 |
| 110821 | Pcca          | propionyl-Coenzyme A c     | 491.136261 | 502.543152 | 239.386749 |
| 68364  | 0610030E20Rik | RIKEN cDNA 0610030E        | 515.490112 | 540.794312 | 240.997147 |
| 18186  | Nrp1          | neuropilin 1               | 1312.44946 | 1413.39502 | 242.717651 |
| 382073 | Ccdc84        | coiled-coil domain conta   | 547.982056 | 625.475037 | 243.723343 |
| 71448  | Tmem80        | transmembrane protein 8    | 668.466675 | 774.200073 | 243.787415 |
| 22034  | Traf6         | TNF receptor-associated    | 512.730469 | 600.44165  | 244.880188 |
| 212073 | 4831426I19Rik | RIKEN cDNA 4831426I        | 632.834839 | 552.665161 | 244.891693 |
| 69020  | Zfp707        | zinc finger protein 707    | 594.307129 | 652.105713 | 247.322113 |
| 68404  | Nrn1          | neuritin 1                 | 6815.77783 | 7446.36426 | 248.902924 |
| 18633  | Pex16         | peroxisomal biogenesis f   | 1072.79199 | 906.412476 | 250.740097 |
| 208846 | Daam1         | dishevelled associated ac  | 647.908508 | 905.432129 | 251.390839 |
| 21763  | Tex2          | testis expressed gene 2    | 996.779053 | 937.785278 | 251.594604 |
| 70804  | Pgrmc2        | progesterone receptor me   | 955.919373 | 907.25     | 252.797485 |
| 18618  | Pemt          | phosphatidylethanolamin    | 6004.92334 | 5540.20312 | 252.891144 |
| 72244  | 1600014C10Rik | RIKEN cDNA 1600014C        | 3512.41748 | 3421.54028 | 254.536057 |
| 15258  | Hipk2         | homeodomain interacting    | 830.842163 | 834.693359 | 254.943588 |
| 75352  | 4930550L24Rik | RIKEN cDNA 4930550L        | 629.932617 | 541.92041  | 255.349472 |
| 67528  | Nudt7         | nudix (nucleoside diphos   | 1256.56689 | 917.438843 | 255.628845 |
| 231997 | Fkbp14        | FK506 binding protein 1    | 581.321472 | 824.351807 | 260.377899 |
| 59038  | Pxmp4         | peroxisomal membrane p     | 2349.07593 | 1567.7251  | 261.738525 |
| 18563  | Pcx           | pyruvate carboxylase       | 3210.3313  | 3313.8999  | 263.639771 |
| 209200 | Dtx3l         | deltex 3-like (Drosophila  | 1126.78784 | 1366.44763 | 264.842651 |
| 320683 | Zfp629        | zinc finger protein 629    | 767.138428 | 1076.97095 | 265.028351 |
| 26363  | Btd           | biotinidase                | 1084.39624 | 1546.93164 | 267.598419 |
| 20315  | Cxcl12        | chemokine (C-X-C motif     | 10355.6562 | 8990.01758 | 268.301727 |
| 17714  | Grpel2        | GrpE-like 2, mitochondri   | 677.078369 | 552.938232 | 268.656677 |
| 68636  | Fahd1         | fumarylacetoacetate hydr   | 953.776001 | 1296.72192 | 271.818329 |
| 99887  | Tmem56        | transmembrane protein 5    | 18902.3164 | 13782.3457 | 275.893616 |
| 244631 | Pskh1         | protein serine kinase H1   | 714.856689 | 753.879089 | 277.980591 |
| 54426  | Hgfac         | hepatocyte growth factor   | 2269.28613 | 3189.31714 | 278.14328  |
| 224647 | D17Wsu92e     | DNA segment, Chr 17, N     | 632.128296 | 687.723999 | 279.102966 |
| 108934 | BC024659      | cDNA sequence BC0246       | 673.786377 | 840.987488 | 282.241608 |
| 72947  | Agxt2l2       | alanine-glyoxylate aminc   | 728.035645 | 1017.7395  | 282.986023 |
| 110135 | Fgb           | fibrinogen beta chain      | 23522.0117 | 34436.1562 | 285.206055 |

|           |               |                             |            |            |            |
|-----------|---------------|-----------------------------|------------|------------|------------|
| 114664    | Hsd17b11      | hydroxysteroid (17-beta)    | 1241.95581 | 854.137329 | 285.288208 |
| 15486     | Hsd17b2       | hydroxysteroid (17-beta)    | 5397.71924 | 5828.70508 | 285.961975 |
| 68631     | Cryl1         | crystallin, lambda 1        | 1086.73462 | 1564.4812  | 286.717865 |
| 70031     | Cmtm8         | CKLF-like MARVEL tra        | 582.028076 | 793.860352 | 287.444183 |
| 14186     | Fgfr4         | fibroblast growth factor r  | 1109.43298 | 1109.19678 | 287.455688 |
| 15525     | Hspa4         | heat shock protein 4        | 971.884888 | 767.973877 | 288.979004 |
| 114229    | Kiss1r        | KISS1 receptor              | 2847.15088 | 3111.2417  | 291.402832 |
| 76574     | Mfsd2a        | major facilitator superfar  | 4959.24512 | 3776.64429 | 297.001465 |
| 14431     | Gamt          | guanidinoacetate methylt    | 1014.54108 | 1091.974   | 302.843292 |
| 80283     | Abtb1         | ankyrin repeat and BTB      | 2260.19775 | 2354.53882 | 304.84314  |
| 59007     | Ngly1         | N-glycanase 1               | 973.337646 | 1125.13208 | 306.151184 |
| 58223     | Mmp19         | matrix metalloproteinase    | 2448.41626 | 2643.20508 | 307.081299 |
| 70484     | Slc35d2       | solute carrier family 35,   | 1585.98022 | 1168.99976 | 311.947021 |
| 320191    | Hook3         | hook homolog 3 (Drosop      | 1538.83777 | 1595.19189 | 313.080872 |
| 14073     | Faah          | fatty acid amide hydrolas   | 2024.47522 | 1798.20398 | 317.719788 |
| 328133    | Slc39a9       | solute carrier family 39 (  | 828.709839 | 970.905273 | 318.638397 |
| 74781     | Wipi2         | WD repeat domain, phos      | 1059.3374  | 1287.1853  | 319.89386  |
| 268566    | Gphn          | gephyrin                    | 1890.51392 | 2105.69287 | 323.160675 |
| 74525     | 8430419L09Rik | RIKEN cDNA 8430419L         | 2841.21191 | 2242.1665  | 323.387451 |
| 13382     | Dld           | dihydrolipoamide dehydr     | 952.397705 | 756.888184 | 324.835175 |
| 68066     | Slc25a39      | solute carrier family 25,   | 945.477905 | 1344.19556 | 325.172058 |
| 73166     | Tm7sf2        | transmembrane 7 superfa     | 1026.01379 | 1132.10107 | 329.758423 |
| 434402    | Gm5617        | predicted gene 5617         | 765.090088 | 1016.87231 | 331.538086 |
| 100383    | Bsdcl         | BSD domain containing       | 894.748779 | 1056.50415 | 334.555115 |
| 18634     | Pex7          | peroxisomal biogenesis f    | 921.432983 | 793.578857 | 334.729309 |
| 212647    | Aldh4a1       | aldehyde dehydrogenase      | 3579.90283 | 2428.37305 | 334.926514 |
| 50850     | Spast         | spastin                     | 744.359253 | 980.429199 | 339.21051  |
| 20181     | Rxra          | retinoid X receptor alpha   | 3168.29492 | 3030.76831 | 339.803711 |
| 12411     | Cbs           | cystathionine beta-syntha   | 2297.73047 | 1927.06909 | 341.391113 |
| 235132    | Zbtb44        | zinc finger and BTB dom     | 2161.9248  | 2440.85352 | 342.768188 |
| 108077    | Skiv2l        | superkiller viralicidic act | 708.957153 | 1030.90491 | 351.796326 |
| 14081     | Acsl1         | acyl-CoA synthetase long    | 10363.2715 | 9082.23242 | 354.900452 |
| 20186     | Nr1h4         | nuclear receptor subfami    | 5198.62988 | 5522.80371 | 358.336548 |
| 20502     | Slc16a2       | solute carrier family 16 (  | 1187.61304 | 1181.94434 | 359.330719 |
| 18569     | Pdcd4         | programmed cell death 4     | 1774.74231 | 2499.66479 | 365.962952 |
| 18553     | Pcsk6         | proprotein convertase sul   | 4025.89087 | 3072.28613 | 366.212738 |
| 20969     | Sdc1          | syndecan 1                  | 1093.27417 | 1320.19482 | 366.450989 |
| 69834     | Rab43         | RAB43, member RAS o         | 2374.45166 | 2398.3667  | 367.369598 |
| 11938     | Atp2a2        | ATPase, Ca++ transporti     | 1060.99609 | 1222.4718  | 370.386658 |
| 67732     | Iah1          | isoamyl acetate-hydrolyz    | 2851.09863 | 2553.38184 | 374.532623 |
| 12411     | Cbs           | cystathionine beta-syntha   | 1500.77271 | 1239.51343 | 375.217834 |
| 100037258 | Dnajc3        | DnaJ (Hsp40) homolog,       | 2892.60449 | 2410.9082  | 375.316467 |
| 320541    | Slc35e2       | solute carrier family 35,   | 1647.60559 | 1585.82373 | 376.235046 |
| 211922    | Fam116a       | family with sequence sim    | 1324.80786 | 1678.3208  | 378.257904 |
| 67101     | 2310039H08Rik | RIKEN cDNA 2310039H         | 1226.14709 | 1195.58789 | 380.408936 |
| 15259     | Hipk3         | homeodomain interacting     | 1444.29126 | 1776.6012  | 381.286438 |
| 67914     | Coq9          | coenzyme Q9 homolog (       | 2125.69287 | 1765.17871 | 381.955261 |
| 66586     | Crls1         | cardiolipin synthase 1      | 793.513733 | 819.346558 | 382.11795  |
| 320415    | Gchfr         | GTP cyclohydrolase I fe     | 4393.86865 | 3773.43311 | 393.732605 |
| 30934     | Tor1b         | torsin family 1, member     | 902.824951 | 1069.79968 | 396.255005 |
| 18408     | Slc25a15      | solute carrier family 25 (  | 4822.61719 | 6091.95312 | 400.511078 |
| 13113     | Cyp3a13       | cytochrome P450, family     | 4226.4502  | 6161.18506 | 402.865906 |
| 110446    | Acat1         | acetyl-Coenzyme A acet      | 2029.54785 | 1392.4303  | 403.248779 |
| 104009    | Qsox1         | quiescin Q6 sulfhydryl o    | 2175.26709 | 2894.75171 | 404.847656 |
| 67880     | Dcxr          | dicarbonyl L-xylulose re    | 1387.26807 | 1180.13635 | 407.47525  |
| 235293    | Sc5d          | sterol-C5-desaturase (fur   | 1159.91187 | 1175.96155 | 409.78241  |
| 246277    | Csad          | cysteine sulfinic acid dec  | 14201.416  | 13701.5469 | 411.346802 |
| 15500     | Hsf2          | heat shock factor 2         | 1157.12683 | 976.213257 | 414.299744 |
| 67384     | Bag4          | BCL2-associated athanos     | 1114.51343 | 1062.96655 | 414.805908 |
| 108958    | Fam73b        | family with sequence sim    | 1175.30396 | 1637.36182 | 414.897919 |
| 231670    | Fbxo21        | F-box protein 21            | 1649.51611 | 1138.86621 | 418.141724 |

|              |               |                             |            |            |            |
|--------------|---------------|-----------------------------|------------|------------|------------|
| 65116        | Prrg2         | proline-rich Gla (G-carboxy | 875.991821 | 1090.67529 | 431.774292 |
| 142688       | Asb13         | ankyrin repeat and SOCS     | 1824.21997 | 1435.75464 | 436.621948 |
| 75578        | Fggy          | FGGY carbohydrate kinase    | 2392.04736 | 1836.45789 | 439.075378 |
| 72144        | Slc37a3       | solute carrier family 37 (O | 1003.1554  | 1032.22339 | 445.650085 |
| 16432        | Itm2b         | integral membrane protei    | 3457.78027 | 3462.44116 | 451.505066 |
| 58809        | Rnase4        | ribonuclease, RNase A fa    | 22701.9199 | 29873.4805 | 455.660889 |
| 71898 223672 | Apol9b Apol9a | apolipoprotein L 9b apol    | 1390.04028 | 1326.59497 | 456.190002 |
| 74440        | 4933407C03Rik | RIKEN cDNA 4933407C0        | 937.016724 | 1160.19312 | 459.71814  |
| 20181        | Rxra          | retinoid X receptor alpha   | 4146.5498  | 4264.89453 | 462.084442 |
| 20334        | Sec23a        | SEC23A (S. cerevisiae)      | 1686.56897 | 2109.61572 | 463.56665  |
| 226252       | Fam160b1      | family with sequence sim    | 960.920654 | 1058.08154 | 465.536926 |
| 66146        | Tmem57        | transmembrane protein 5     | 1644.70337 | 1545.41797 | 469.751953 |
| 74178        | Stk40         | serine/threonine kinase 4   | 1908.77966 | 1519.2146  | 471.321259 |
| 16922        | Phyh          | phytanoyl-CoA hydroxyl      | 6675.09473 | 9557.85938 | 473.763153 |
| 20411        | Sorbs1        | sorbin and SH3 domain c     | 1569.75183 | 2169.90137 | 479.110352 |
| 104174       | Gldc          | glycine decarboxylase       | 2418.2229  | 3133.31543 | 481.721497 |
| 68477        | Rmnd5a        | required for meiotic nucl   | 2118.6543  | 2478.64795 | 482.62204  |
| 353156       | Egfl7         | EGF-like domain 7           | 2320.30835 | 3258.48975 | 485.888855 |
| 52588        | Tspan14       | tetraspanin 14              | 1077.76953 | 1421.53247 | 488.615051 |
| 225010       | Lclat1        | lysocardiolipin acyltrans   | 1760.85352 | 1651.92639 | 492.493164 |
| 74754        | Dhcr24        | 24-dehydrocholesterol re    | 2813.604   | 2466.92676 | 493.173462 |
| 12509        | Cd59a         | CD59a antigen               | 1962.68518 | 2046.91138 | 494.03949  |
| 207304       | Hectd1        | HECT domain containin       | 1364.45874 | 1450.40125 | 497.31781  |
| 52633        | Nit2          | nitrilase family, member    | 1316.75854 | 1273.67188 | 500.568207 |
| 102294       | Cyp4v3        | cytochrome P450, family     | 11565.3496 | 10629.9453 | 502.433289 |
| 110391       | Qdpr          | quinoid dihydropteridine    | 2645.88965 | 2795.21362 | 510.984894 |
| 11639        | Ak4           | adenylate kinase 4          | 3206.58496 | 2221.25391 | 511.956055 |
| 235043       | Tmem205       | transmembrane protein 2     | 9080.33789 | 6180.95605 | 516.762573 |
| 80285        | Parp9         | poly (ADP-ribose) polyn     | 1517.52551 | 1461.55066 | 516.879272 |
| 66972        | Slc25a23      | solute carrier family 25 (O | 2200.73779 | 2361.70459 | 518.251404 |
| 67302        | Zc3h13        | zinc finger CCCH type c     | 1273.75073 | 1539.60339 | 524.697998 |
| 226791       | Lyplal1       | lysophospholipase-like 1    | 1555.45435 | 1771.57324 | 526.070068 |
| 140630       | Ube4a         | ubiquitination factor E4A   | 1800.95752 | 2065.82324 | 527.337036 |
| 11798        | Xiap          | X-linked inhibitor of apo   | 1135.32031 | 1267.29285 | 529.616333 |
| 56690        | Mlycd         | malonyl-CoA decarboxy       | 9857.61133 | 8986.04492 | 530.040283 |
| 67095        | Trak1         | trafficking protein, kines  | 1229.72266 | 1245.64917 | 537.405396 |
| 72278        | Ccpg1         | cell cycle progression 1    | 2585.33203 | 3854.49048 | 540.64917  |
| 74334        | Ranbp10       | RAN binding protein 10      | 3112.35522 | 3875.14111 | 541.288452 |
| 28042        | Ept1          | ethanolaminephosphotran     | 1480.08142 | 2066.06665 | 543.061523 |
| 12892        | Cpox          | coproporphyrinogen oxid     | 3037.68872 | 3733.74854 | 544.154297 |
| 216440       | Os9           | amplified in osteosarcom    | 1123.61475 | 1536.58728 | 547.095764 |
| 11981        | Atp9a         | ATPase, class II, type 9A   | 2263.18555 | 2954.94775 | 556.222473 |
| 272589       | Tbcel         | tubulin folding cofactor 1  | 1677.13196 | 1618.38196 | 557.44342  |
| 69129        | Pex11c        | peroxisomal biogenesis f    | 2316.60303 | 1893.82056 | 558.623291 |
| 52065        | Mfhas1        | malignant fibrous histioc   | 1173.20325 | 1347.04333 | 558.914185 |
| 15490        | Hsd17b7       | hydroxysteroid (17-beta)    | 2902.38721 | 3380.33105 | 561.111206 |
| 13804        | Endog         | endonuclease G              | 2495.96899 | 2973.14697 | 562.187561 |
| 212862       | Chpt1         | choline phosphotransfera    | 1976.9541  | 1743.72168 | 562.657532 |
| 270166       | Clpx          | caseinolytic peptidase X    | 2449.73877 | 2839.34985 | 566.936646 |
| 223267       | A2ld1         | AIG2-like domain 1          | 1260.87439 | 1447.57031 | 577.731262 |
| 57435        | Plin4         | perilipin 4                 | 1322.08459 | 1825.4585  | 579.062317 |
| 20425        | Shmt1         | serine hydroxymethyltran    | 1648.15381 | 1319.44507 | 584.89917  |
| 110198       | Akr7a5        | aldo-keto reductase fami    | 2795.45361 | 2409.31812 | 586.049438 |
| 57279        | Slc25a20      | solute carrier family 25 (O | 3512.26392 | 2852.29883 | 586.422485 |
| 18569        | Pdcd4         | programmed cell death 4     | 2374.61304 | 3289.83447 | 587.631958 |
| 70510        | Rnf167        | ring finger protein 167     | 1331.26978 | 1598.88574 | 589.30481  |
| 109299       | C330006A16Rik | RIKEN cDNA C330006A16       | 1398.10071 | 1364.05249 | 596.415222 |
| 67155        | Smarca2       | SWI/SNF related, matrix     | 2135.67651 | 2681.53271 | 602.501953 |
| 228607       | Mavs          | mitochondrial antiviral s   | 1250.10815 | 1284.67969 | 613.087891 |
| 73389        | Hbp1          | high mobility group box     | 1706.04663 | 1674.59448 | 637.224243 |
| 66552        | 2010106G01Rik | RIKEN cDNA 2010106G01       | 1393.62219 | 1290.38965 | 638.159241 |

|                 |                |                             |            |            |            |
|-----------------|----------------|-----------------------------|------------|------------|------------|
| 67636           | Lym5           | LYR motif containing 5      | 2325.62793 | 2008.97705 | 645.036377 |
| 69632           | Arhgef12       | Rho guanine nucleotide e    | 1470.69666 | 1813.86621 | 645.244995 |
| 664994          | Isoc2a         | isochorismatase domain      | 1314.49634 | 1663.15784 | 649.512573 |
| 13528           | Dtnb           | dystrobrevin, beta          | 1470.79639 | 2109.65137 | 652.151672 |
| 23972           | Papss2         | 3'-phosphoadenosine 5'-r    | 2925.69702 | 3667.86377 | 652.465576 |
| 13177           | Eci1           | enoyl-Coenzyme A delta      | 4209.4248  | 3310.53296 | 657.848938 |
| 70335           | Reep6          | receptor accessory protei   | 18253.3555 | 23482.1035 | 659.603882 |
| 14287           | Fpgs           | folylpolyglutamyl synthe    | 1350.29919 | 1405.84473 | 660.156067 |
| 14962           | Cfb            | complement factor B         | 45025.6797 | 53988.0664 | 660.400879 |
| 170459          | Stard4         | StAR-related lipid transf   | 1668.59302 | 1888.33838 | 670.045288 |
| 13850           | Ephx2          | epoxide hydrolase 2, cyto   | 44938.4023 | 32613.1523 | 676.026733 |
| 27376           | Slc25a10       | solute carrier family 25 (C | 1633.5     | 2235.73364 | 682.264648 |
| 214627          | Papd5          | PAP associated domain c     | 1436.74878 | 1898.28955 | 682.862793 |
| 28199           | Dcaf11         | DDB1 and CUL4 associat      | 3826.59399 | 4400.26611 | 693.675537 |
| 16432           | Itm2b          | integral membrane prote     | 3414.99072 | 4070.75854 | 704.795532 |
| 22117           | Tst            | thiosulfate sulfurtransfer  | 4891.43848 | 5045.56543 | 705.342773 |
| 100046684 28295 | LOC100046684 D | ES1 protein homolog, m      | 1675.5509  | 1696.14197 | 707.708984 |
| 58887           | Repin1         | replication initiator 1     | 1485.23169 | 1839.61694 | 708.888916 |
| 55951           | Brp44l         | brain protein 44-like       | 2381.89404 | 3017.31006 | 711.687378 |
| 66273           | 1810020D17Rik  | RIKEN cDNA 1810020D17       | 1451.44067 | 2027.79565 | 712.847534 |
| 224824          | Pex6           | peroxisomal biogenesis f    | 4425.0293  | 3731.48364 | 724.396484 |
| 16548           | Khk            | ketoheokinase               | 7964.07422 | 9458.14258 | 727.793091 |
| 27399           | Ip6k1          | inositol hexaphosphate k    | 1519.23804 | 2033.39648 | 732.885559 |
| 14600           | Ghr            | growth hormone receptor     | 2831.53076 | 2128.18262 | 740.832397 |
| 319263          | Pcmt1          | protein-L-isoaspartate (D   | 3495.29077 | 4259.41553 | 741.187378 |
| 233016          | Blvrb          | biliverdin reductase B (fl  | 18166.9844 | 18652.8633 | 750.992798 |
| 68024           | Hist1h2bc      | histone cluster 1, H2bc     | 4577.18555 | 6184.19727 | 758.313538 |
| 66790           | Grtp1          | GH regulated TBC prote      | 1776.52441 | 2247.30762 | 766.263672 |
| 66885           | Acad5b         | acyl-Coenzyme A dehyd       | 1613.97949 | 1880.37793 | 770.851685 |
| 217463          | Snx13          | sorting nexin 13            | 2016.578   | 2498.10449 | 770.950317 |
| 19662           | Rbp4           | retinol binding protein 4,  | 4052.13623 | 4596.04199 | 775.792969 |
| 57279           | Slc25a20       | solute carrier family 25 (C | 2884.12305 | 2174.17236 | 780.134521 |
| 21452           | Tcn2           | transcobalamin 2            | 2076.36572 | 2949.91016 | 829.756409 |
| 13202           | Ddt            | D-dopachrome tautomer       | 6461.34863 | 9691.35938 | 831.563965 |
| 28169           | Agpat3         | 1-acylglycerol-3-phosph     | 2274.53931 | 1811.35376 | 858.950745 |
| 68778           | 1110038D17Rik  | RIKEN cDNA 1110038D17       | 2837.04395 | 2995.64941 | 863.58313  |
| 68728           | Trp53inp2      | transformation related pr   | 5483.72559 | 5007.16602 | 864.158264 |
| 229003          | BC006779       | cDNA sequence BC006779      | 3722.1145  | 4106.54395 | 866.820312 |
| 235439          | Herc1          | hect (homologous to the     | 2974.50464 | 2396.1499  | 871.36731  |
| 108156          | Mthfd1         | methylenetetrahydrofolat    | 1788.67371 | 2253.68652 | 875.04657  |
| 239743          | Klhl6          | kelch-like 6 (Drosophila)   | 2017.55872 | 2107.46704 | 887.410522 |
| 15529           | Sdc2           | syndecan 2                  | 7581.4668  | 8058.92871 | 909.251221 |
| 12040           | Bckd1b         | branched chain ketoacid     | 8930.25195 | 9978.89844 | 935.683228 |
| 13036           | Ctsh           | cathepsin H                 | 8866.05078 | 9012.18262 | 946.137756 |
| 68180           | Hyi            | hydroxypyruvate isomer      | 6778.32422 | 5575.72266 | 950.839111 |
| 140740          | Sec63          | SEC63-like (S. cerevisiae)  | 1959.26331 | 2485.16553 | 961.691284 |
| 15356           | Hmgcl          | 3-hydroxy-3-methylgluta     | 15003.0498 | 10306.375  | 990.869202 |
| 67836           | Wdr83          | WD repeat domain conta      | 2208.08838 | 2291.72827 | 1012.67377 |
| 17117           | Amacr          | alpha-methylacyl-CoA re     | 3978.31738 | 4323.92773 | 1018.23792 |
| 214597          | Sidt2          | SID1 transmembrane fan      | 2667.50122 | 3423.69189 | 1030.97327 |
| 15199           | Hebp1          | heme binding protein 1      | 11255.5195 | 11303.3809 | 1038.37939 |
| 22661           | Zfp148         | zinc finger protein 148     | 2389.44922 | 2355.3042  | 1047.46509 |
| 69635           | Dapk1          | death associated protein    | 2690.98682 | 3279.1123  | 1065.79419 |
| 235674          | Acaal1b        | acetyl-Coenzyme A acyl      | 34858.2695 | 27056.0859 | 1070.63696 |
| 192197          | Bcas3          | breast carcinoma amplifi    | 2291.33838 | 3286.07959 | 1071.76416 |
| 64384           | Sirt3          | sirtuin 3 (silent mating ty | 4301.28125 | 5555.99561 | 1092.6748  |
| 66349           | Atp5sl         | ATP5S-like                  | 2743.17383 | 2896.32495 | 1099.46472 |
| 17158           | Man2a1         | mannosidase 2, alpha 1      | 4257.79688 | 5549.93359 | 1108.86597 |
| 66904           | Pccb           | propionyl Coenzyme A de     | 4231.21387 | 4521.97559 | 1119.82983 |
| 74159           | Acbd5          | acyl-Coenzyme A bindin      | 3109.73804 | 2897.54004 | 1141.71484 |
| 57875           | Angptl4        | angiopoietin-like 4         | 6672.93701 | 9018.84277 | 1146.80737 |

|                 |               |                             |            |            |            |
|-----------------|---------------|-----------------------------|------------|------------|------------|
| 12633           | Cflar         | CASP8 and FADD-like 2       | 2403.80347 | 2565.22559 | 1148.96509 |
| 100727          | Ugt2b34       | UDP glucuronosyltransferase | 3147.63525 | 2789.56323 | 1149.31348 |
| 14854           | Gss           | glutathione synthetase      | 2348.64819 | 3030.4502  | 1161.53271 |
| 76491           | Abhd14b       | abhydrolase domain cont     | 2386.82715 | 3081.17749 | 1171.04236 |
| 20656           | Sod2          | superoxide dismutase 2,     | 3103.02905 | 3433.86963 | 1199.05688 |
| 93721           | Cpn1          | carboxypeptidase N, poly    | 9510.39746 | 13364.0039 | 1296.14783 |
| 11946           | Atp5a1        | ATP synthase, H+ transp     | 2899.18066 | 3244.50098 | 1316.07739 |
| 66890           | Lman2         | lectin, mannose-binding     | 5884.12695 | 4965.30566 | 1350.60583 |
| 23821           | Bace1         | beta-site APP cleaving e    | 3602.74365 | 3296.99561 | 1362.87769 |
| 56876           | Nelf          | nasal embryonic LHRH        | 6422.48975 | 7427.90674 | 1381.78369 |
| 74148           | 1300001I01Rik | RIKEN cDNA 1300001I         | 5420.05811 | 5479.37451 | 1388.25146 |
| 13601           | Ecm1          | extracellular matrix prote  | 3453.5835  | 3353.00708 | 1389.27026 |
| 76408           | Abcc3         | ATP-binding cassette, su    | 3795.37256 | 4517.02539 | 1414.30054 |
| 20917           | Suc1g2        | succinate-Coenzyme A li     | 3281.17383 | 4090.7854  | 1430.92725 |
| 12894           | Cpt1a         | carnitine palmitoyltransf   | 7801.28516 | 11602.3525 | 1431.53027 |
| 14085           | Fah           | fumarylacetoacetate hydr    | 14215.6133 | 20951.0742 | 1482.62292 |
| 68917           | Hint2         | histidine triad nucleotide  | 9683.99219 | 8048.03906 | 1486.93652 |
| 19305           | Pex5          | peroxisomal biogenesis f    | 3636.47754 | 4491.41797 | 1513.18286 |
| 70361           | Lman1         | lectin, mannose-binding,    | 3109.18848 | 3184.71777 | 1531.19141 |
| 19301           | Pxmp2         | peroxisomal membrane p      | 9699.36914 | 9583.78711 | 1531.67285 |
| 12780           | Abcc2         | ATP-binding cassette, su    | 5650.38184 | 6397.67188 | 1543.98096 |
| 19268           | Ptpnf         | protein tyrosine phosphat   | 4319.33691 | 5157.42285 | 1574.38965 |
| 12266           | C3            | complement component        | 36598.5117 | 47907.4297 | 1580.3186  |
| 73724           | Mcee          | methylmalonyl CoA epim      | 3341.00879 | 4976.7749  | 1615.29236 |
| 27981           | D4Wsu53e      | DNA segment, Chr 4, W       | 6598.14697 | 6974.5293  | 1622.82507 |
| 14860           | Gsta4         | glutathione S-transferase   | 3680.95068 | 3772.8374  | 1623.51196 |
| 69574           | Cmb1          | carboxymethylenebutene      | 7220.53564 | 6872.44336 | 1643.05371 |
| 50799           | Slc25a13      | solute carrier family 25 (  | 7119.96582 | 7329.59375 | 1643.30518 |
| 29811           | Ndrp2         | N-myc downstream regul      | 60692.1133 | 62133.7148 | 1648.67542 |
| 22134           | Tgoln1        | trans-golgi network prote   | 3959.64136 | 4312.66553 | 1661.81995 |
| 67452           | Pnpla8        | patatin-like phospholipas   | 4809.94727 | 5992.17188 | 1663.30225 |
| 14651           | Hagh          | hydroxyacyl glutathione     | 4845.43457 | 6972.12402 | 1681.61316 |
| 56752           | Aldh9a1       | aldehyde dehydrogenase      | 5813.29395 | 5762.7666  | 1725.39307 |
| 230249          | AI314180      | expressed sequence AI31     | 3637.78613 | 3746.72876 | 1738.98462 |
| 208884          | Zdhhc9        | zinc finger, DHHC doma      | 5891.66113 | 6104.1123  | 1761.37085 |
| 15488           | Hsd17b4       | hydroxysteroid (17-beta)    | 7184.96387 | 4920.7041  | 1776.00928 |
| 211389          | Suox          | sulfite oxidase             | 9515.08008 | 10090.0957 | 1807.021   |
| 14645           | Glul          | glutamate-ammonia ligas     | 10078.7344 | 10861.7148 | 1820.25427 |
| 51798           | Echl          | enoyl coenzyme A hydrat     | 10560.3242 | 8522.71973 | 1862.99072 |
| 100502992 20280 | Gm19491 Scp2  | predicted gene, 19491 st    | 15690.2021 | 11628.293  | 1879.94775 |
| 78920           | Dlst          | dihydrolipoamide S-succ     | 4094.6167  | 5123.20117 | 1917.72803 |
| 73192           | Xpot          | exportin, tRNA (nuclear     | 5556.7002  | 6132.7793  | 1928.86621 |
| 217069          | Trim25        | tripartite motif-containin  | 5735.76465 | 7958.29248 | 1984.25757 |
| 12460           | Ccs           | copper chaperone for sup    | 8400.47168 | 11714.0957 | 1990.8125  |
| 72999           | Insig2        | insulin induced gene 2      | 10764.3145 | 12566.1719 | 1992.77795 |
| 11370           | Acadv1        | acyl-Coenzyme A dehyd       | 12938.7002 | 12432.5039 | 2004.56519 |
| 13849           | Ephx1         | epoxide hydrolase 1, mic    | 5250.54102 | 6969.00488 | 2038.62024 |
| 70984           | 4931406C07Rik | RIKEN cDNA 4931406C         | 10842.1475 | 9986.63086 | 2120.5144  |
| 18035           | Nfkb1a        | nuclear factor of kappa li  | 6857.57861 | 8629.6416  | 2177.74463 |
| 14828           | Hspa5         | heat shock protein 5        | 5116.59082 | 5764.19824 | 2242.62573 |
| 14473           | Gc            | group specific componen     | 11648.6348 | 17316.6641 | 2275.8938  |
| 15473           | Hrsp12        | heat-responsive protein 1   | 15376.2822 | 12922.7969 | 2291.1582  |
| 18082           | Nipsnap1      | 4-nitrophenylphosphatas     | 9170.51562 | 12629.8691 | 2316.18677 |
| 16010           | Igf1          | insulin-like growth facto   | 12931.5557 | 16646.7539 | 2332.50439 |
| 11655           | Alas1         | aminolevulinic acid synt    | 12460.6748 | 14272.0283 | 2345.18896 |
| 74114           | Crot          | carnitine O-octanoyltrans   | 21497.1406 | 17274.3828 | 2398.70361 |
| 238055          | Apob          | apolipoprotein B            | 14862.5879 | 19347.9688 | 2414.20288 |
| 58875           | Hibadh        | 3-hydroxyisobutyrate del    | 6479.65723 | 8707.10254 | 2425.95557 |
| 23986           | Eci2          | enoyl-Coenzyme A delta      | 9487.41797 | 6908.33008 | 2632.22559 |
| 217615          | Ctage5        | CTAGE family, member        | 7087.7041  | 8398.00391 | 2808.09155 |
| 64209           | Herpud1       | homocysteine-inducible,     | 14149.3398 | 20928.4258 | 2863.43359 |



|        |           |                            |            |            |            |
|--------|-----------|----------------------------|------------|------------|------------|
| 53945  | Slc40a1   | solute carrier family 40 ( | 17442.9375 | 18887.2031 | 3087.62012 |
| 113868 | Acaa1a    | acetyl-Coenzyme A acyl     | 12772.25   | 11770.5879 | 3124.4541  |
| 56615  | Mgst1     | microsomal glutathione S   | 12267.1064 | 9509.38672 | 3164.51709 |
| 12896  | Cpt2      | carntine palmitoyltransf   | 21977.1289 | 14835.3193 | 3208.0686  |
| 57436  | Gabarapl1 | gamma-aminobutyric aci     | 10044.8281 | 13311.1221 | 3221.03076 |
| 11430  | Acox1     | acyl-Coenzyme A oxidas     | 13612.6582 | 16231.4395 | 3344.74121 |
| 11364  | Acadm     | acyl-Coenzyme A dehyd      | 20127.1211 | 14720.0156 | 3400.06836 |
| 27973  | Vkorc1    | vitamin K epoxide reduc    | 11726.043  | 12399.4668 | 3657.93359 |
| 15473  | Hrsp12    | heat-responsive protein 1  | 28073.873  | 19593.125  | 3958.26123 |
| 67125  | Tspan31   | tetraspanin 31             | 8038.1499  | 8075.72412 | 4000.60156 |
| 19299  | Abcd3     | ATP-binding cassette, su   | 28246.4375 | 19228.2051 | 4051.77148 |
| 14600  | Ghr       | growth hormone receptor    | 14200.9746 | 13495.5322 | 4493.60254 |
| 11534  | Adk       | adenosine kinase           | 10073.7227 | 14015.4043 | 4955.31055 |
| 110213 | Tmbim6    | transmembrane BAX inh      | 11330.9453 | 13882.0752 | 5005.15137 |
| 66092  | Ghitm     | growth hormone inducib     | 10572.4473 | 12834.0879 | 5272.12988 |
| 71900  | Tmem106b  | transmembrane protein 1    | 15437.873  | 16232.6035 | 5340.8335  |
| 76238  | Grhpr     | glyoxylate reductase/hyd   | 19756.8086 | 19426.6328 | 5724.86133 |
| 56018  | Stard10   | START domain containi      | 13550.0566 | 18595.168  | 5937.09766 |
| 103172 | Chchd10   | coiled-coil-helix-coiled-c | 20447.5234 | 22940.8574 | 6042.87305 |
| 101502 | Hsd3b7    | hydroxy-delta-5-steroid c  | 30313.2559 | 25661.1055 | 6657.59277 |
| 18242  | Oat       | ornithine aminotransferas  | 35267.5547 | 29672.2051 | 6711.43799 |
| 57874  | Ptplad1   | protein tyrosine phospho   | 15874.5127 | 20008.6484 | 7067.60205 |
| 14661  | Glud1     | glutamate dehydrogenase    | 56500.0977 | 51925.8555 | 7726.37793 |
| 14859  | Gsta3     | glutathione S-transferase  | 31050.5449 | 38174.0586 | 8070.07227 |
| 68465  | Adipor2   | adiponectin receptor 2     | 34666.9258 | 35141.5039 | 8213.96094 |
| 57874  | Ptplad1   | protein tyrosine phospho   | 19765.9922 | 19155.998  | 8255.71973 |
| 107503 | Atf5      | activating transcription f | 30668.832  | 39056.1016 | 8504.11621 |
| 14775  | Gpx1      | glutathione peroxidase 1   | 18224.084  | 19215.7031 | 8647.5918  |
| 52538  | Acaa2     | acetyl-Coenzyme A acyl     | 58482.6641 | 60199.0938 | 9620.22461 |
| 15107  | Hadh      | hydroxyacyl-Coenzyme       | 25414.0977 | 27484.125  | 11338.5996 |
| 11669  | Aldh2     | aldehyde dehydrogenase     | 36541.8281 | 35247.5117 | 11820.4688 |
| 68801  | Elov15    | ELOVL family member        | 35787.543  | 42984.6797 | 12511.3457 |
| 22041  | Trf       | transferrin                | 31044.0117 | 42361.9453 | 14671.0234 |
| 19662  | Rbp4      | retinol binding protein 4  | 37808.9648 | 45243.7891 | 16254.9609 |
| 20363  | Sepp1     | selenoprotein P, plasma    | 62336.0312 | 65664.625  | 23347.7969 |

Supplementary Table 2: List of genes participate in Glutathion pathway.

| Group           | Entrez Gene | Gene symbol | Description                                | Normalize Value |             |           |
|-----------------|-------------|-------------|--------------------------------------------|-----------------|-------------|-----------|
|                 |             |             |                                            | Normal liver    | Gnmt-/- HCC | Ymac-1    |
| Up regulation   | 20810       | Srm         | spermidine synthase                        | 804.56665       | 933.604858  | 7861.4609 |
|                 | 14381       | G6pdx       | glucose-6-phosphate dehydrogenase          | 50              | 193.773895  | 454.02091 |
|                 | 110208      | Pgd         | phosphogluconate dehydrogenase             | 117.625122      | 502.523315  | 1638.8667 |
|                 | 382985      | Rrm2b       | ribonucleotide reductase M2                | 81.3770905      | 208.423309  | 454.21317 |
|                 | 72692       | Hnrpl1      | heterogeneous nuclear ribonucleoprotein L1 | 866.386841      | 1288.99316  | 4632.8223 |
|                 | 14862       | Gstm1       | glutathione S-transferase mu 1             | 50              | 50          | 135.91821 |
|                 | 66073       | Txndc12     | thioredoxin domain containing 12           | 1032.11621      | 1142.88831  | 2894.1958 |
|                 | 20135       | Rrm2        | ribonucleotide reductase M2                | 50              | 447.213501  | 3187.5278 |
|                 | 20133       | Rrm1        | ribonucleotide reductase M1                | 50              | 50          | 714.13257 |
|                 | 68214       | Gsto2       | glutathione S-transferase omega 2          | 50              | 50          | 356.16248 |
|                 | 14873       | Gsto1       | glutathione S-transferase omega 1          | 12182.5176      | 11097.4551  | 36592.375 |
|                 | 14870       | Gstp1       | glutathione S-transferase pi 1             | 2667.90039      | 2870.19092  | 8398.4141 |
|                 | 211666      | Mgst2       | microsomal glutathione S-transferase 2     | 50              | 70.4105072  | 260.69833 |
| Down regulation | 14854       | Gss         | glutathione synthetase                     | 2348.64819      | 3030.4502   | 1161.5327 |
|                 | 14775       | Gpx1        | glutathione peroxidase 1                   | 18224.084       | 19215.7031  | 8647.5918 |
|                 | 14859       | Gsta3       | glutathione S-transferase A3               | 31050.5449      | 38174.0586  | 8070.0723 |
|                 | 14860       | Gsta4       | glutathione S-transferase A4               | 3680.95068      | 3772.8374   | 1623.512  |
|                 | 75475       | Oplah       | 5-oxoprolinase (ATP-dependent)             | 1054.95874      | 1085.93176  | 55.323994 |
|                 | 76263       | Gstk1       | glutathione S-transferase kappa 1          | 7946.54053      | 5457.95166  | 50        |
|                 | 14871       | Gstt1       | glutathione S-transferase theta 1          | 4609.16553      | 6476.35156  | 85.26767  |
|                 | 14874       | Gstz1       | glutathione transferase zeta 1             | 4110.88281      | 4512.09521  | 141.19638 |
|                 | 16790       | Anpep       | alanyl (membrane) aminopeptidase           | 163.650818      | 154.291962  | 50        |
|                 | 56615       | Mgst1       | microsomal glutathione S-transferase 1     | 12267.1064      | 9509.38672  | 3164.5171 |
|                 | 68312       | Gstm7       | glutathione S-transferase mu 7             | 296.782104      | 391.981506  | 50        |

**Supplementary Table 3.** G6PD and CD133 expression in Tumor (T) versus tumor-adjacent (TA) tissues from 37 HCC patients and the associations with their clinical characteristics.

|                                    | G6PD expression (T/TA) |      |                             | CD133 expression (T/TA) |      |                |
|------------------------------------|------------------------|------|-----------------------------|-------------------------|------|----------------|
|                                    | Low                    | High | <i>P</i> value <sup>c</sup> | Low                     | High | <i>P</i> value |
| <b>Age</b>                         |                        |      | 0.823                       |                         |      | 0.098          |
|                                    | < 60                   | 7    | 6                           | 5                       | 8    |                |
|                                    | ≥ 60                   | 12   | 12                          | 16                      | 8    |                |
| <b>Gender</b>                      |                        |      | 0.248                       |                         |      | 0.236          |
|                                    | Female                 | 8    | 11                          | 9                       | 10   |                |
|                                    | Male                   | 11   | 7                           | 12                      | 6    |                |
| <b>Cirrhosis</b>                   |                        |      | 0.909                       |                         |      | 0.565          |
|                                    | Negative               | 13   | 12                          | 15                      | 10   |                |
|                                    | Positive               | 6    | 6                           | 6                       | 6    |                |
| <b>Viral infection<sup>a</sup></b> |                        |      | 0.281                       |                         |      | 0.983          |
|                                    | NBNC                   | 6    | 5                           | 6                       | 5    |                |
|                                    | HBV                    | 8    | 4                           | 7                       | 5    |                |
|                                    | HCV                    | 5    | 9                           | 8                       | 6    |                |
| <b>Tumor size (cm)</b>             |                        |      | 0.419                       |                         |      | <b>0.039</b>   |
|                                    | < 5                    | 12   | 9                           | 15                      | 6    |                |
|                                    | ≥ 5                    | 7    | 9                           | 6                       | 10   |                |
| <b>AFP (ng/ml)</b>                 |                        |      | 0.254                       |                         |      |                |
|                                    | < 20                   | 12   | 8                           | 12                      | 8    | 0.666          |
|                                    | ≥ 20                   | 7    | 10                          | 9                       | 8    |                |
| <b>TNM<sup>b</sup> stage</b>       |                        |      | <b>0.033</b>                |                         |      | <b>0.005</b>   |
|                                    | Early                  | 13   | 6                           | 15                      | 4    |                |
|                                    | Late                   | 6    | 12                          | 6                       | 12   |                |
| <b>Tumor type</b>                  |                        |      | 0.092                       |                         |      | <b>0.041</b>   |
|                                    | Solitary               | 17   | 12                          | 19                      | 10   |                |
|                                    | Multiple               | 2    | 6                           | 2                       | 6    |                |
| <b>PVTT</b>                        |                        |      | 0.072                       |                         |      | <b>0.015</b>   |
|                                    | Negative               | 13   | 7                           | 15                      | 5    |                |
|                                    | Positive               | 6    | 11                          | 6                       | 11   |                |

---

<sup>a</sup>HBV, HBV sAg (+); HCV, anti-HCV antibody (+); NBNC, HBV sAg (-) and anti-HCV antibodies (-).

<sup>b</sup>Early stage, TNM stage = I; Late stage, beyond TNM stage I (TNM stage = II+IIIA+IIIB+IIIC+IV).

<sup>c</sup>Estimated by  $\chi^2$  test.

**Supplementary Table 4.** Characteristics and univariate survival analysis of 37 HCC cases

|                                    | Case No. | Median OS <sup>c</sup><br>(years) | <i>P</i> value <sup>e</sup> |
|------------------------------------|----------|-----------------------------------|-----------------------------|
| <b>Age</b>                         |          |                                   | 0.44                        |
|                                    | < 60     | 13                                | 2.858                       |
|                                    | ≥ 60     | 24                                | — <sup>d</sup>              |
| <b>Gender</b>                      |          |                                   | 0.246                       |
|                                    | Female   | 19                                | — <sup>d</sup>              |
|                                    | Male     | 18                                | — <sup>d</sup>              |
| <b>Cirrhosis</b>                   |          |                                   | 0.311                       |
|                                    | Negative | 25                                | — <sup>d</sup>              |
|                                    | Positive | 12                                | 2.858                       |
| <b>Viral infection<sup>a</sup></b> |          |                                   | 0.974                       |
|                                    | NBNC     | 11                                | — <sup>d</sup>              |
|                                    | HBV      | 12                                | — <sup>d</sup>              |
|                                    | HCV      | 14                                | — <sup>d</sup>              |
| <b>Tumor size (cm)</b>             |          |                                   | 0.057                       |
|                                    | < 5      | 21                                | — <sup>d</sup>              |
|                                    | ≥ 5      | 16                                | 2.542                       |
| <b>AFP (ng/ml)</b>                 |          |                                   | 0.649                       |
|                                    | < 20     | 20                                | — <sup>d</sup>              |
|                                    | ≥ 20     | 17                                | — <sup>d</sup>              |
| <b>TNM<sup>b</sup> stage</b>       |          |                                   | <b>0.014</b>                |
|                                    | Early    | 19                                | — <sup>d</sup>              |
|                                    | Late     | 18                                | 2.542                       |
| <b>Tumor type</b>                  |          |                                   | <b>0.003</b>                |
|                                    | Solitary | 29                                | — <sup>d</sup>              |
|                                    | Multiple | 8                                 | 1.194                       |
| <b>PVTT</b>                        |          |                                   | <b>0.007</b>                |
|                                    | Negative | 20                                | — <sup>d</sup>              |
|                                    | Positive | 17                                | 2.514                       |

|                         |      |    |                |                   |
|-------------------------|------|----|----------------|-------------------|
| <b>G6PD expression</b>  |      |    |                | <b>0.003</b>      |
|                         | Low  | 19 | — <sup>d</sup> |                   |
|                         | High | 18 | 1.617          |                   |
| <b>CD133 expression</b> |      |    |                | <b>&lt;0.0001</b> |
|                         | Low  | 21 | — <sup>d</sup> |                   |
|                         | High | 16 | 1.617          |                   |

---

<sup>a</sup>HBV, HBV sAg (+); HCV, anti-HCV antibody (+); NBNC, HBV sAg (-) and anti-HCV antibodies (-).

<sup>b</sup>Early stage, TNM stage = I; Late stage, beyond TNM stage I (TNM stage = II+IIIA+IIIB+IIIC+IV).

<sup>c</sup>OS, overall survival.

<sup>d</sup>Median survival was not reached.

<sup>e</sup>Estimated by log-rank test.

**Supplementary Table 5.** The comparison of gene expression profile in SH-J1 and Ymac-1.

| Official symbol |        | Full name                                          | Expression in SH-J1 | Expression in Ymac-1 <sup>a</sup> | References |
|-----------------|--------|----------------------------------------------------|---------------------|-----------------------------------|------------|
| Human           | Mouse  |                                                    |                     |                                   |            |
| EPCAM           | Epcam  | Epithelial cell adhesion molecule                  | Non-detectable      | Ymac-1 << HCC <sup>b</sup>        | [4]        |
| SRF             | Srf    | Serum response factor                              | Ddetectable         | Ymac-1 ≈ HCC                      | [5, 6]     |
| DDR1            | Ddr1   | Discoidin domain receptor tyrosine kinase 1        | Non-detectable      | Ymac-1 >> HCC                     | [7]        |
| SIRT1           | Sirt1  | Sirtuin 1                                          | Ddetectable         | Ymac-1 ≈ HCC                      | [8]        |
| PPARG           | Pparg  | Peroxisome proliferator activated receptor gamma   | Ddetectable         | Ymac-1 ≈ HCC                      | [9]        |
| HMGB2           | Hmgb2  | High mobility group box 2                          | Ddetectable         | Ymac-1 >> HCC                     | [10]       |
| NME2            | Nme2   | NME/NM23 nucleoside diphosphate kinase 2 (NM23-H2) | Ddetectable         | Ymac-1 > HCC                      | [11]       |
| MOK             | Mok    | MOK protein kinase (RAGE)                          | Ddetectable         | Ymac-1 >> HCC                     | [12]       |
| LCN2            | Lcn2   | Lipocalin 2                                        | Non-detectable      | Ymac-1 << HCC                     | [13]       |
| PTTG1           | Pttg1  | Pituitary tumor-transforming 1                     | Ddetectable         | Ymac-1 ≈ HCC                      | [14]       |
| EPHA2           | Epha2  | EPH receptor A2                                    | Ddetectable         | Ymac-1 >> HCC                     | [15]       |
| DUSP1           | Dusp1  | Dual specificity phosphatase 1                     | Non-detectable      | Ymac-1 ≈ HCC                      | [16]       |
| VRK1            | Vrk1   | Vaccinia related kinase 1                          | Ddetectable         | Ymac-1 >> HCC                     | [17]       |
| RPL36A          | Mrpl44 | Ribosomal protein L36a                             | Ddetectable         | Ymac-1 > HCC                      | [18]       |

<sup>a</sup>The expression in Ymac-1 is showed as comparison of Ymac-1 and Gmmt KO HCC tissue (HCC).

<sup>b</sup>">>" or "<<" represent a difference in expression is >3-folds; ">" or "<" represent a difference in expression is >1.5-folds but <3-folds; "≈" represent a different in expression is <1.5-folds.

## Supplementary References

1. Yen, C.H., et al., *Functional characterization of glycine N-methyltransferase and its interactive protein DEPDC6/DEPTOR in hepatocellular carcinoma*. *Molecular Medicine*, 2012. **18**(1): p. 286-296.
2. Liu, H.H., et al., *Characterization of reduced expression of glycine N-methyltransferase in cancerous hepatic tissues using two newly developed monoclonal antibodies*. *Journal of Biomedical Science*, 2003. **10**(1): p. 87-97.
3. Huang da, W., B.T. Sherman, and R.A. Lempicki, *Systematic and integrative analysis of large gene lists using DAVID bioinformatics resources*. *Nat Protoc*, 2009. **4**(1): p. 44-57.
4. Bae, J.S., et al., *Expression and role of epithelial cell adhesion molecule in dysplastic nodule and hepatocellular carcinoma*. *Int J Oncol*, 2012. **41**(6): p. 2150-8.
5. Kwon, C.Y., et al., *The role of serum response factor in hepatocellular carcinoma: implications for disease progression*. *Int J Oncol*, 2010. **37**(4): p. 837-44.
6. Bae, J.S., et al., *Serum response factor induces epithelial to mesenchymal transition with resistance to sorafenib in hepatocellular carcinoma*. *Int J Oncol*, 2014. **44**(1): p. 129-36.
7. Park, H.S., et al., *Overexpression of discoidin domain receptor 1 increases the migration and invasion of hepatocellular carcinoma cells in association with matrix metalloproteinase*. *Oncol Rep*, 2007. **18**(6): p. 1435-41.
8. Choi, H.N., et al., *Expression and role of SIRT1 in hepatocellular carcinoma*. *Oncol Rep*, 2011. **26**(2): p. 503-10.
9. Kim, K.R., et al., *A peroxisome proliferator-activated receptor gamma antagonist induces vimentin cleavage and inhibits invasion in high-grade hepatocellular carcinoma*. *Oncol Rep*, 2007. **18**(4): p. 825-32.
10. Kwon, J.H., et al., *Overexpression of high-mobility group box 2 is associated with tumor aggressiveness and prognosis of hepatocellular carcinoma*. *Clin Cancer Res*, 2010. **16**(22): p. 5511-21.
11. Lee, M.J., et al., *Pro-oncogenic potential of NM23-H2 in hepatocellular carcinoma*. *Exp Mol Med*, 2012. **44**(3): p. 214-24.
12. Cha, H.J., et al., *Overexpression of renal tumor antigen is associated with tumor invasion and poor prognosis of hepatocellular carcinoma*. *Ann Surg Oncol*, 2012. **19 Suppl 3**: p. S404-11.
13. Wang, Y.P., et al., *Lipocalin-2 negatively modulates the*



- epithelial-to-mesenchymal transition in hepatocellular carcinoma through the epidermal growth factor (TGF-beta1)/Lcn2/Twist1 pathway.* Hepatology, 2013. **58**(4): p. 1349-61.
14. Cho-Rok, J., et al., *Adenovirus-mediated transfer of siRNA against PTTG1 inhibits liver cancer cell growth in vitro and in vivo.* Hepatology, 2006. **43**(5): p. 1042-52.
  15. Cui, X.D., et al., *EFNA1 ligand and its receptor EphA2: potential biomarkers for hepatocellular carcinoma.* Int J Cancer, 2010. **126**(4): p. 940-9.
  16. Hao, P.P., et al., *Disruption of a regulatory loop between DUSP1 and p53 contributes to hepatocellular carcinoma development and progression.* J Hepatol, 2015. **62**(6): p. 1278-86.
  17. Lee, N., et al., *Vaccinia-related kinase 1 promotes hepatocellular carcinoma by controlling the levels of cell cycle regulators associated with G1/S transition.* Oncotarget, 2015. **6**(30): p. 30130-48.
  18. Kim, J.H., et al., *Over-expression of the ribosomal protein L36a gene is associated with cellular proliferation in hepatocellular carcinoma.* Hepatology, 2004. **39**(1): p. 129-38.
